# Supplementary material for: Is it possible to predict the stability of a crystal structure under the influence of pressure? Quantum chemical study of ibuprofen crystals
Source: Royal Society of Chemistry journal article supplement (doi:10.1039/d1nj05780d), 2022-01-01
Supplement: d1nj05780d1.pdf [file d1nj05780d1.pdf]

Supporting information for

**Is it possible to predict the stability of a crystal structure to the pressure influence? Quantum chemical study of the ibuprofen crystals**

Yevhenii A. Vaksler<sup>a,b,c</sup>, Abdenacer Idrissi<sup>c</sup>, Svitlana V. Shishkina<sup>a,b\*</sup>

<sup>a</sup> SSI “Institute for Single Crystals” NAS of Ukraine, 60 Nauky ave., Kharkiv, 61001, Ukraine

<sup>b</sup> V.N. Karazin Kharkiv National University, 4 Svobody Sq., Kharkiv, 61022, Ukraine

<sup>c</sup> Laboratoire de Spectroscopie pour les Interactions, la Réactivité et L’environnement (UMR CNRS A8516), Université de Lille, 59655, Villeneuve d'Ascq Cedex, France

## List of contents

|                                                                                                                                                                                                                                                                                                                                 |           |
|---------------------------------------------------------------------------------------------------------------------------------------------------------------------------------------------------------------------------------------------------------------------------------------------------------------------------------|-----------|
| <b>Table S1.</b> Symmetry codes, binding types, interaction energies of the <b>monomeric</b> building unit with neighboring ones ( $E_{\text{int}}$ , kcal/mol) and the contribution of these energies to the total interaction energy (%) in the crystal of ibuprofen <b>form I</b> under <b>ambient pressure</b> . .....      | <b>9</b>  |
| <b>Table S2.</b> Symmetry codes, binding types, interaction energies of the <b>dimeric</b> building unit with neighboring ones ( $E_{\text{int}}$ , kcal/mol) and the contribution of these energies to the total interaction energy (%) in the crystal of ibuprofen <b>form I</b> under <b>ambient pressure</b> . .....        | <b>10</b> |
| <b>Table S3.</b> Symmetry codes, binding types, interaction energies of the <b>monomeric</b> building unit with neighboring ones ( $E_{\text{int}}$ , kcal/mol) and the contribution of these energies to the total interaction energy (%) in the crystal of ibuprofen <b>form I</b> under pressure of <b>0.23 GPa</b> . .....  | <b>11</b> |
| <b>Table S4.</b> Symmetry codes, binding types, interaction energies of the <b>monomeric</b> building unit with neighboring ones ( $E_{\text{int}}$ , kcal/mol) and the contribution of these energies to the total interaction energy (%) in the crystal of ibuprofen <b>form I</b> under pressure of <b>0.60 GPa</b> . .....  | <b>12</b> |
| <b>Table S5.</b> Symmetry codes, binding types, interaction energies of the <b>monomeric</b> building unit with neighboring ones ( $E_{\text{int}}$ , kcal/mol) and the contribution of these energies to the total interaction energy (%) in the crystal of ibuprofen <b>form I</b> under pressure of <b>0.80 GPa</b> . .....  | <b>13</b> |
| <b>Table S6.</b> Symmetry codes, binding types, interaction energies of the <b>monomeric</b> building unit with neighboring ones ( $E_{\text{int}}$ , kcal/mol) and the contribution of these energies to the total interaction energy (%) in the crystal of ibuprofen <b>form I</b> under pressure of <b>0.88 GPa</b> . .....  | <b>14</b> |
| <b>Table S7.</b> Symmetry codes, binding types, interaction energies of the <b>monomeric</b> building unit with neighboring ones ( $E_{\text{int}}$ , kcal/mol) and the contribution of these energies to the total interaction energy (%) in the crystal of ibuprofen <b>form I</b> under pressure of <b>1.70 GPa</b> . .....  | <b>15</b> |
| <b>Table S8.</b> Symmetry codes, binding types, interaction energies of the <b>monomeric</b> building unit with neighboring ones ( $E_{\text{int}}$ , kcal/mol) and the contribution of these energies to the total interaction energy (%) in the crystal of ibuprofen <b>form I</b> under pressure of <b>1.89 GPa</b> . .....  | <b>16</b> |
| <b>Table S9.</b> Symmetry codes, binding types, interaction energies of the <b>monomeric</b> building unit with neighboring ones ( $E_{\text{int}}$ , kcal/mol) and the contribution of these energies to the total interaction energy (%) in the crystal of ibuprofen <b>form I</b> under pressure of <b>2.32 GPa</b> . .....  | <b>17</b> |
| <b>Table S10.</b> Symmetry codes, binding types, interaction energies of the <b>monomeric</b> building unit with neighboring ones ( $E_{\text{int}}$ , kcal/mol) and the contribution of these energies to the total interaction energy (%) in the crystal of ibuprofen <b>form I</b> under pressure of <b>2.65 GPa</b> . ..... | <b>18</b> |
| <b>Table S11.</b> Symmetry codes, binding types, interaction energies of the <b>monomeric</b> building unit with neighboring ones ( $E_{\text{int}}$ , kcal/mol) and the contribution of these energies to the total interaction energy (%) in the crystal of ibuprofen <b>form I</b> under pressure of <b>3.46 GPa</b> . ..... | <b>19</b> |

|                                                                                                                                                                                                                                                                                                                                                                                                                                                      |           |
|------------------------------------------------------------------------------------------------------------------------------------------------------------------------------------------------------------------------------------------------------------------------------------------------------------------------------------------------------------------------------------------------------------------------------------------------------|-----------|
| <b>Table S12.</b> Symmetry codes, binding types, interaction energies of the <b>monomeric</b> building unit with neighboring ones ( $E_{\text{int}}$ , kcal/mol) and the contribution of these energies to the total interaction energy (%) in the crystal of ibuprofen <b>form I</b> under pressure of <b>4.00 GPa</b> . .....                                                                                                                      | <b>20</b> |
| <b>Table S13.</b> Symmetry codes, binding types, interaction energies of the <b>dimeric</b> building unit with neighboring ones ( $E_{\text{int}}$ , kcal/mol) and the contribution of these energies to the total interaction energy (%) in the crystal of ibuprofen <b>form I</b> under pressure of <b>0.23 GPa</b> . .....                                                                                                                        | <b>21</b> |
| <b>Table S14.</b> Symmetry codes, binding types, interaction energies of the <b>dimeric</b> building unit with neighboring ones ( $E_{\text{int}}$ , kcal/mol) and the contribution of these energies to the total interaction energy (%) in the crystal of ibuprofen <b>form I</b> under pressure of <b>0.60 GPa</b> . .....                                                                                                                        | <b>22</b> |
| <b>Table S15.</b> Symmetry codes, binding types, interaction energies of the <b>dimeric</b> building unit with neighboring ones ( $E_{\text{int}}$ , kcal/mol) and the contribution of these energies to the total interaction energy (%) in the crystal of ibuprofen <b>form I</b> under pressure of <b>0.80 GPa</b> . .....                                                                                                                        | <b>23</b> |
| <b>Table S16.</b> Symmetry codes, binding types, interaction energies of the <b>dimeric</b> building unit with neighboring ones ( $E_{\text{int}}$ , kcal/mol) and the contribution of these energies to the total interaction energy (%) in the crystal of ibuprofen <b>form I</b> under pressure of <b>0.88 GPa</b> . .....                                                                                                                        | <b>24</b> |
| <b>Table S17.</b> Symmetry codes, binding types, interaction energies of the <b>dimeric</b> building unit with neighboring ones ( $E_{\text{int}}$ , kcal/mol) and the contribution of these energies to the total interaction energy (%) in the crystal of ibuprofen <b>form I</b> under pressure of <b>1.70 GPa</b> . .....                                                                                                                        | <b>25</b> |
| <b>Table S18.</b> Symmetry codes, binding types, interaction energies of the <b>dimeric</b> building unit with neighboring ones ( $E_{\text{int}}$ , kcal/mol) and the contribution of these energies to the total interaction energy (%) in the crystal of ibuprofen <b>form I</b> under pressure of <b>1.89 GPa</b> . .....                                                                                                                        | <b>26</b> |
| <b>Table S19.</b> Symmetry codes, binding types, interaction energies of the <b>dimeric</b> building unit with neighboring ones ( $E_{\text{int}}$ , kcal/mol) and the contribution of these energies to the total interaction energy (%) in the crystal of ibuprofen <b>form I</b> under pressure of <b>2.32 GPa</b> . .....                                                                                                                        | <b>27</b> |
| <b>Table S20.</b> Symmetry codes, binding types, interaction energies of the <b>dimeric</b> building unit with neighboring ones ( $E_{\text{int}}$ , kcal/mol) and the contribution of these energies to the total interaction energy (%) in the crystal of ibuprofen <b>form I</b> under pressure of <b>2.65 GPa</b> . .....                                                                                                                        | <b>28</b> |
| <b>Table S21.</b> Symmetry codes, binding types, interaction energies of the <b>dimeric</b> building unit with neighboring ones ( $E_{\text{int}}$ , kcal/mol) and the contribution of these energies to the total interaction energy (%) in the crystal of ibuprofen <b>form I</b> under pressure of <b>3.46 GPa</b> . .....                                                                                                                        | <b>29</b> |
| <b>Table S22.</b> Symmetry codes, binding types, interaction energies of the <b>dimeric</b> building unit with neighboring ones ( $E_{\text{int}}$ , kcal/mol) and the contribution of these energies to the total interaction energy (%) in the crystal of ibuprofen <b>form I</b> under pressure of <b>4.00 GPa</b> . .....                                                                                                                        | <b>30</b> |
| <b>Table S23.</b> <b>Minimal interatomic distances</b> and <b>absolute deviation (AD)</b> of their determination for the different step sizes in comparison to the high-precision computation with a step size of 1/1000 of a translation occurring during the displacement of the <b>dimeric</b> building units in polymorph <b>I</b> of ibuprofen along <b>[001]</b> and <b>[010]</b> directions of layers parallel to the <b>(100)</b> plane..... | <b>31</b> |

**Table S24. Minimal differences between the interatomic distances and the corresponding sums of van der Waals radii ( $\delta$ ) and absolute deviation (AD) of their determination for the different step sizes in comparison to the high-precision computation with a step size of 1/1000 of a translation occurring during the displacement of the **dimeric** building units in polymorph **I** of ibuprofen along **[001]** and **[010]** directions of layers parallel to the **(100)** plane.....33**

**Figure S1. Packing of the molecules in the crystals of ibuprofen polymorphs **I** at ambient pressure and under the pressure of 0.23 and 0.60 GPa. The projections in *a* (right), *b* (middle), *c* (left) crystallographic directions are represented.....35**

**Figure S2. Packing of the molecules in the crystals of ibuprofen polymorph **I** under the pressure of 0.80 (A), 0.88 (B), 1.70 (C) and 1.89 GPa (D). The projections in *a* (right), *b* (middle), *c* (left) crystallographic directions are represented.....36**

**Figure S3. Packing of the molecules in the crystals of ibuprofen polymorph **I** under the pressure of 2.32 (A), 2.65 (B), 3.46 (C) and 4.00 GPa (D). The projections in *a* (right), *b* (middle), *c* (left) crystallographic directions are represented.....37**

**Figure S4. Packing of the energy vector diagrams representing the pairwise interaction energy distribution of **monomeric** building units in the crystals of ibuprofen polymorphs **I** (A) at ambient pressure and under the pressure of 0.23 (B) and 0.60 GPa (C). The projections in *a* (right), *b* (middle), *c* (left) crystallographic directions are represented.....38**

**Figure S5. Packing of the energy vector diagrams representing the pairwise interaction energy distribution of **monomeric** building units in the crystals of ibuprofen polymorph **I** under the pressure of 0.80 (A), 0.88 (B), 1.70 (C) and 1.89 GPa (D). The projections in *a* (right), *b* (middle), *c* (left) crystallographic directions are represented.....39**

**Figure S6. Packing of the energy vector diagrams representing the pairwise interaction energy distribution of **monomeric** building units in the crystals of ibuprofen polymorph **I** under the pressure of 2.32 (A), 2.65 (B), 3.46 (C) and 4.00 GPa (D). The projections in *a* (right), *b* (middle), *c* (left) crystallographic directions are represented.....40**

**Figure S7. Packing of the energy vector diagrams representing the pairwise interaction energy distribution of **dimeric** building units in the crystals of ibuprofen polymorphs **I** (A) at ambient pressure and under the pressure of 0.23 (B) and 0.60 GPa (B). The projections in *a* (right), *b* (middle), *c* (left) crystallographic directions are represented.....41**

**Figure S8. Packing of the energy vector diagrams representing the pairwise interaction energy distribution of **dimeric** building units in the crystals of ibuprofen polymorph **I** under the pressure of 0.80 (A), 0.88 (B), 1.70 (C) and 1.89 GPa (D). The projections in *a* (right), *b* (middle), *c* (left) crystallographic directions are represented.....42**

**Figure S9. Packing of the energy vector diagrams representing the pairwise interaction energy distribution of **dimeric** building units in the crystals of ibuprofen polymorph **I** under the pressure of 2.32 (A), 2.65 (B), 3.46 (C) and 4.00 GPa (D). The projections in *a* (right), *b* (middle), *c* (left) crystallographic directions are represented.....43**



|                                                                                                                                                                                                                                                                                                                      |           |
|----------------------------------------------------------------------------------------------------------------------------------------------------------------------------------------------------------------------------------------------------------------------------------------------------------------------|-----------|
| <b>Figure S10.</b> 2D-maps of the parameter $\delta$ during the displacement of the mobile DBU to the fixed part within the (100) crystallographic layer calculated using four model systems extracted from the crystal structure of the ibuprofen polymorphic form <b>I</b> at <b>ambient pressure</b> .            | <b>44</b> |
| <b>Figure S11.</b> 2D-maps of the parameter $\delta$ during the displacement of the mobile DBU to the fixed part within the (100) crystallographic layer calculated using four model systems extracted from the crystal structure of the ibuprofen polymorphic form <b>I</b> under the pressure of <b>0.23 GPa</b> . | <b>45</b> |
| <b>Figure S12.</b> 2D-maps of the parameter $\delta$ during the displacement of the mobile DBU to the fixed part within the (100) crystallographic layer calculated using four model systems extracted from the crystal structure of the ibuprofen polymorphic form <b>I</b> under the pressure of <b>0.60 GPa</b> . | <b>46</b> |
| <b>Figure S13.</b> 2D-maps of the parameter $\delta$ during the displacement of the mobile DBU to the fixed part within the (100) crystallographic layer calculated using four model systems extracted from the crystal structure of the ibuprofen polymorphic form <b>I</b> under the pressure of <b>0.80 GPa</b> . | <b>47</b> |
| <b>Figure S14.</b> 2D-maps of the parameter $\delta$ during the displacement of the mobile DBU to the fixed part within the (100) crystallographic layer calculated using four model systems extracted from the crystal structure of the ibuprofen polymorphic form <b>I</b> under the pressure of <b>0.88 GPa</b> . | <b>48</b> |
| <b>Figure S15.</b> 2D-maps of the parameter $\delta$ during the displacement of the mobile DBU to the fixed part within the (100) crystallographic layer calculated using four model systems extracted from the crystal structure of the ibuprofen polymorphic form <b>I</b> under the pressure of <b>1.70 GPa</b> . | <b>49</b> |
| <b>Figure S16.</b> 2D-maps of the parameter $\delta$ during the displacement of the mobile DBU to the fixed part within the (100) crystallographic layer calculated using four model systems extracted from the crystal structure of the ibuprofen polymorphic form <b>I</b> under the pressure of <b>1.89 GPa</b> . | <b>50</b> |
| <b>Figure S17.</b> 2D-maps of the parameter $\delta$ during the displacement of the mobile DBU to the fixed part within the (100) crystallographic layer calculated using four model systems extracted from the crystal structure of the ibuprofen polymorphic form <b>I</b> under the pressure of <b>2.32 GPa</b> . | <b>51</b> |
| <b>Figure S18.</b> 2D-maps of the parameter $\delta$ during the displacement of the mobile DBU to the fixed part within the (100) crystallographic layer calculated using four model systems extracted from the crystal structure of the ibuprofen polymorphic form <b>I</b> under the pressure of <b>2.65 GPa</b> . | <b>52</b> |
| <b>Figure S19.</b> 2D-maps of the parameter $\delta$ during the displacement of the mobile DBU to the fixed part within the (100) crystallographic layer calculated using four model systems                                                                                                                         |           |

extracted from the crystal structure of the ibuprofen polymorphic form **I** under the pressure of **3.46 GPa** .....53

**Figure S20.** 2D-maps of the parameter  $\delta$  during the displacement of the mobile DBU to the fixed part within the (100) crystallographic layer calculated using four model systems extracted from the crystal structure of the ibuprofen polymorphic form **I** under the pressure of **4.00 GPa**.....54

**Figure S21.** Profiles of interaction energy (bright green) and topological parameter  $\delta$  (red) occurring during the shear of the dimeric building unit(s) along the direction **[001]** in parallel to a neighboring layer (**100**) with lower coordinate  $a$  in the crystals of the polymorphic modification **I** of ibuprofen **under ambient pressure**. The line of zero energy is marked as the black dashed one.....55

**Figure S22.** Profiles of interaction energy (bright green) and topological parameter  $\delta$  (red) occurring during the shear of the dimeric building unit(s) along the direction **[001]** in parallel to a neighboring layer (**100**) with lower coordinate  $a$  in the crystals of the polymorphic modification **I** of ibuprofen at the pressure of **0.23 GPa**. The line of zero energy is marked as the black dashed one.....55

**Figure S23.** Profiles of interaction energy (bright green) and topological parameter  $\delta$  (red) occurring during the shear of the dimeric building unit(s) along the direction **[001]** in parallel to a neighboring layer (**100**) with lower coordinate  $a$  in the crystals of the polymorphic modification **I** of ibuprofen at the pressure of **0.60 GPa**. The line of zero energy is marked as the black dashed one.....56

**Figure S24.** Profiles of interaction energy (bright green) and topological parameter  $\delta$  (red) occurring during the shear of the dimeric building unit(s) along the direction **[001]** in parallel to a neighboring layer (**100**) with lower coordinate  $a$  in the crystals of the polymorphic modification **I** of ibuprofen at the pressure of **0.80 GPa**. The line of zero energy is marked as the black dashed one.....56

**Figure S25.** Profiles of interaction energy (bright green) and topological parameter  $\delta$  (red) occurring during the shear of the dimeric building unit(s) along the direction **[001]** in parallel to a neighboring layer (**100**) with lower coordinate  $a$  in the crystals of the polymorphic modification **I** of ibuprofen at the pressure of **0.88 GPa**. The line of zero energy is marked as the black dashed one.....57

**Figure S26.** Profiles of interaction energy (bright green) and topological parameter  $\delta$  (red) occurring during the shear of the dimeric building unit(s) along the direction **[001]** in parallel to a neighboring layer (**100**) with lower coordinate  $a$  in the crystals of the polymorphic modification **I** of ibuprofen at the pressure of **1.70 GPa**. The line of zero energy is marked as the black dashed one.....57

**Figure S27.** Profiles of interaction energy (bright green) and topological parameter  $\delta$  (red) occurring during the shear of the dimeric building unit(s) along the direction **[001]** in parallel to a neighboring layer (**100**) with lower coordinate  $a$  in the crystals of the polymorphic

modification **I** of ibuprofen at the pressure of **2.65 GPa**. The line of zero energy is marked as the black dashed one.....**58**

**Figure S28.** Profiles of interaction energy (bright green) and topological parameter  $\delta$  (red) occurring during the shear of the dimeric building unit(s) along the direction **[001]** in parallel to a neighboring layer **(100)** with lower coordinate  $a$  in the crystals of the polymorphic modification **I** of ibuprofen at the pressure of **4.00 GPa**. The line of zero energy is marked as the black dashed one.....**58**

**Table S1.** Symmetry codes, binding types, interaction energies of the **monomeric** building unit with neighboring ones ( $E_{\text{int}}$ , kcal/mol) and the contribution of these energies to the total interaction energy (%) in the crystal of ibuprofen **form I** under **ambient pressure**.

| Dimer     | Symmetry operation | $E_{\text{int}}$ ,<br>kcal/mol | Contribution to the<br>total interaction<br>energy, % | Interaction                  |
|-----------|--------------------|--------------------------------|-------------------------------------------------------|------------------------------|
| <b>d1</b> | <b>1-x,-y,1-z</b>  | <b>-11.5</b>                   | <b>18.9</b>                                           | <b>O-H...O, 1.85 Å, 176°</b> |
| d2        | x,1/2-y,-1/2+z     | -6.5                           | 10.6                                                  | C-H... $\pi$ , 2.86 Å, 166°  |
| d3        | x,1/2-y,1/2+z      | -6.5                           | 10.6                                                  | C-H... $\pi$ , 2.86 Å, 166°  |
| d4        | x,3/2-y,-1/2+z     | -6.0                           | 9.8                                                   | non-specific                 |
| d5        | x,3/2-y,1/2+z      | -6.0                           | 9.8                                                   | non-specific                 |
| d6        | 1-x,1-y,1-z        | -5.8                           | 9.6                                                   | non-specific                 |
| d7        | 2-x,1-y,1-z        | -3.7                           | 6.1                                                   | non-specific                 |
| d8        | x,-1+y,z           | -2.7                           | 4.4                                                   | non-specific                 |
| d9        | x,1+y,z            | -2.7                           | 4.4                                                   | non-specific                 |
| d10       | 2-x,-1/2+y,1/2-z   | -2.2                           | 3.6                                                   | non-specific                 |
| d11       | 2-x,1/2+y,1/2-z    | -2.2                           | 3.6                                                   | non-specific                 |
| d12       | 1-x,-1/2+y,3/2-z   | -1.8                           | 3.0                                                   | non-specific                 |
| d13       | 1-x,1/2+y,3/2-z    | -1.8                           | 3.0                                                   | non-specific                 |
| d14       | 2-x,2-y,1-z        | -1.7                           | 2.8                                                   | non-specific                 |

**Table S2.** Symmetry codes, binding types, interaction energies of the **dimeric** building unit with neighboring ones ( $E_{\text{int}}$ , kcal/mol) and the contribution of these energies to the total interaction energy (%) in the crystal of ibuprofen **form I** under **ambient pressure**.

| Dimer | Symmetry operation | $E_{\text{int}}$ ,<br>kcal/mol | Contribution to the<br>total interaction<br>energy, % | Interaction                 |
|-------|--------------------|--------------------------------|-------------------------------------------------------|-----------------------------|
| dd1   | 1-x,-1-y,1-z       | -10.7                          | 10.6                                                  | non-specific                |
| dd2   | 1-x,1-y,1-z        | -10.7                          | 10.6                                                  | non-specific                |
| dd3   | 1-x,-1/2+y,1/2-z   | -8.8                           | 8.8                                                   | C-H... $\pi$ , 2.86 Å, 166° |
| dd4   | 1-x,-1/2+y,3/2-z   | -8.8                           | 8.8                                                   | C-H... $\pi$ , 2.86 Å, 166° |
| dd5   | 1-x,1/2+y,1/2-z    | -8.8                           | 8.8                                                   | C-H... $\pi$ , 2.86 Å, 166° |
| dd6   | 1-x,1/2+y,3/2-z    | -8.8                           | 8.8                                                   | C-H... $\pi$ , 2.86 Å, 166° |
| dd7   | 1-x,-3/2+y,1/2-z   | -6.0                           | 6.0                                                   | non-specific                |
| dd8   | 1-x,-3/2+y,3/2-z   | -6.0                           | 6.0                                                   | non-specific                |
| dd9   | 1-x,3/2+y,1/2-z    | -6.0                           | 6.0                                                   | non-specific                |
| dd10  | 1-x,3/2+y,3/2-z    | -6.0                           | 6.0                                                   | non-specific                |
| dd11  | -x,-1-y,1-z        | -3.8                           | 3.8                                                   | non-specific                |
| dd12  | 2-x,1-y,1-z        | -3.8                           | 3.8                                                   | non-specific                |
| dd13  | -x,-1/2+y,3/2-z    | -2.2                           | 2.2                                                   | non-specific                |
| dd14  | -x,1/2+y,3/2-z     | -2.2                           | 2.2                                                   | non-specific                |
| dd15  | 2-x,-1/2+y,1/2-z   | -2.2                           | 2.2                                                   | non-specific                |
| dd16  | 2-x,1/2+y,1/2-z    | -2.2                           | 2.2                                                   | non-specific                |
| dd17  | -x,-2-y,1-z        | -1.7                           | 1.7                                                   | non-specific                |
| dd18  | 2-x,2-y,1-z        | -1.7                           | 1.7                                                   | non-specific                |

**Table S3.** Symmetry codes, binding types, interaction energies of the **monomeric** building unit with neighboring ones ( $E_{\text{int}}$ , kcal/mol) and the contribution of these energies to the total interaction energy (%) in the crystal of ibuprofen **form I** under pressure of **0.23 GPa**.

| Dimer     | Symmetry operation | $E_{\text{int}}$ ,<br>kcal/mol | Contribution to the<br>total interaction<br>energy, % | Interaction                  |
|-----------|--------------------|--------------------------------|-------------------------------------------------------|------------------------------|
| <b>d1</b> | <b>1-x,-y,1-z</b>  | <b>-10.9</b>                   | <b>17.7</b>                                           | <b>O-H...O, 1.80 Å, 176°</b> |
| d2        | x,1/2-y,-1/2+z     | -6.5                           | 10.6                                                  | C-H... $\pi$ , 2.77 Å, 165°  |
| d3        | x,1/2-y,1/2+z      | -6.5                           | 10.6                                                  | C-H... $\pi$ , 2.77 Å, 165°  |
| d4        | x,3/2-y,-1/2+z     | -6.1                           | 10.0                                                  | non-specific                 |
| d5        | x,3/2-y,1/2+z      | -6.1                           | 10.0                                                  | non-specific                 |
| d6        | 1-x,1-y,1-z        | -5.6                           | 9.1                                                   | non-specific                 |
| d7        | 2-x,1-y,1-z        | -4.0                           | 6.5                                                   | non-specific                 |
| d8        | x,-1+y,z           | -2.9                           | 4.6                                                   | non-specific                 |
| d9        | x,1+y,z            | -2.9                           | 4.6                                                   | non-specific                 |
| d10       | 2-x,-1/2+y,1/2-z   | -2.2                           | 3.6                                                   | non-specific                 |
| d11       | 2-x,1/2+y,1/2-z    | -2.2                           | 3.6                                                   | non-specific                 |
| d12       | 1-x,-1/2+y,3/2-z   | -1.9                           | 3.1                                                   | non-specific                 |
| d13       | 1-x,1/2+y,3/2-z    | -1.9                           | 3.1                                                   | non-specific                 |
| d14       | 2-x,2-y,1-z        | -1.9                           | 3.1                                                   | non-specific                 |

**Table S4.** Symmetry codes, binding types, interaction energies of the **monomeric** building unit with neighboring ones ( $E_{\text{int}}$ , kcal/mol) and the contribution of these energies to the total interaction energy (%) in the crystal of ibuprofen **form I** under pressure of **0.60 GPa**.

| Dimer     | Symmetry operation | $E_{\text{int}}$ ,<br>kcal/mol | Contribution to the<br>total interaction<br>energy, % | Interaction                  |
|-----------|--------------------|--------------------------------|-------------------------------------------------------|------------------------------|
| <b>d1</b> | <b>1-x,-y,1-z</b>  | <b>-10.9</b>                   | <b>16.8</b>                                           | <b>O-H...O, 1.82 Å, 173°</b> |
| d2        | x,3/2-y,-1/2+z     | -6.8                           | 10.5                                                  | non-specific                 |
| d3        | x,3/2-y,1/2+z      | -6.8                           | 10.5                                                  | non-specific                 |
| d4        | x,1/2-y,-1/2+z     | -6.6                           | 10.3                                                  | C-H... $\pi$ , 2.69 Å, 164°  |
| d5        | x,1/2-y,1/2+z      | -6.6                           | 10.3                                                  | C-H... $\pi$ , 2.69 Å, 164°  |
| d6        | 1-x,1-y,1-z        | -5.8                           | 8.9                                                   | non-specific                 |
| d7        | 2-x,1-y,1-z        | -4.2                           | 6.5                                                   | non-specific                 |
| d8        | x,-1+y,z           | -3.0                           | 4.6                                                   | non-specific                 |
| d9        | x,1+y,z            | -3.0                           | 4.6                                                   | non-specific                 |
| d10       | 2-x,-1/2+y,1/2-z   | -2.5                           | 3.8                                                   | non-specific                 |
| d11       | 2-x,1/2+y,1/2-z    | -2.5                           | 3.8                                                   | non-specific                 |
| d12       | 2-x,2-y,1-z        | -2.0                           | 3.2                                                   | non-specific                 |
| d13       | 1-x,-1/2+y,3/2-z   | -2.0                           | 3.1                                                   | non-specific                 |
| d14       | 1-x,1/2+y,3/2-z    | -2.0                           | 3.1                                                   | non-specific                 |

**Table S5.** Symmetry codes, binding types, interaction energies of the **monomeric** building unit with neighboring ones ( $E_{\text{int}}$ , kcal/mol) and the contribution of these energies to the total interaction energy (%) in the crystal of ibuprofen **form I** under pressure of **0.80 GPa**.

| Dimer     | Symmetry operation | $E_{\text{int}}$ ,<br>kcal/mol | Contribution to the<br>total interaction<br>energy, % | Interaction                  |
|-----------|--------------------|--------------------------------|-------------------------------------------------------|------------------------------|
| <b>d1</b> | <b>1-x,-y,1-z</b>  | <b>-11.8</b>                   | <b>17.6</b>                                           | <b>O-H...O, 1.78 Å, 172°</b> |
| d2        | x,3/2-y,-1/2+z     | -7.0                           | 10.5                                                  | C...H, 2.85 Å                |
| d3        | x,3/2-y,1/2+z      | -7.0                           | 10.5                                                  | C...H, 2.85 Å                |
| d4        | x,1/2-y,-1/2+z     | -6.7                           | 10.0                                                  | C-H... $\pi$ , 2.65 Å, 166°  |
| d5        | x,1/2-y,1/2+z      | -6.7                           | 10.0                                                  | C-H... $\pi$ , 2.65 Å, 166°  |
| d6        | 1-x,1-y,1-z        | -5.7                           | 8.5                                                   | non-specific                 |
| d7        | 2-x,1-y,1-z        | -4.4                           | 6.6                                                   | non-specific                 |
| d8        | x,-1+y,z           | -3.1                           | 4.6                                                   | non-specific                 |
| d9        | x,1+y,z            | -3.1                           | 4.6                                                   | non-specific                 |
| d10       | 2-x,-1/2+y,1/2-z   | -2.6                           | 3.9                                                   | non-specific                 |
| d11       | 2-x,1/2+y,1/2-z    | -2.6                           | 3.9                                                   | non-specific                 |
| d12       | 2-x,2-y,1-z        | -2.1                           | 3.2                                                   | H...H, 2.34 Å                |
| d13       | 1-x,-1/2+y,3/2-z   | -2.0                           | 3.0                                                   | non-specific                 |
| d14       | 1-x,1/2+y,3/2-z    | -2.0                           | 3.0                                                   | non-specific                 |



**Table S6.** Symmetry codes, binding types, interaction energies of the **monomeric** building unit with neighboring ones ( $E_{\text{int}}$ , kcal/mol) and the contribution of these energies to the total interaction energy (%) in the crystal of ibuprofen **form I** under pressure of **0.88 GPa**.

| Dimer     | Symmetry operation | $E_{\text{int}}$ ,<br>kcal/mol | Contribution to the<br>total interaction<br>energy, % | Interaction                                |
|-----------|--------------------|--------------------------------|-------------------------------------------------------|--------------------------------------------|
| <b>d1</b> | <b>1-x,-y,1-z</b>  | <b>-12.1</b>                   | <b>18.0</b>                                           | <b>O-H...O, 1.82 Å, 172°</b>               |
| d2        | x,3/2-y,-1/2+z     | -7.1                           | 10.6                                                  | C...H, 2.85 Å                              |
| d3        | x,3/2-y,1/2+z      | -7.1                           | 10.6                                                  | C...H, 2.85 Å                              |
| d4        | x,1/2-y,-1/2+z     | -6.6                           | 9.8                                                   | C-H... $\pi$ , 2.68 Å, 164°; C...H, 2.88 Å |
| d5        | x,1/2-y,1/2+z      | -6.6                           | 9.8                                                   | C-H... $\pi$ , 2.68 Å, 164°; C...H, 2.88 Å |
| d6        | 1-x,1-y,1-z        | -5.6                           | 8.3                                                   | non-specific                               |
| d7        | 2-x,1-y,1-z        | -4.4                           | 6.6                                                   | non-specific                               |
| d8        | x,-1+y,z           | -3.2                           | 4.7                                                   | non-specific                               |
| d9        | x,1+y,z            | -3.2                           | 4.7                                                   | non-specific                               |
| d10       | 2-x,-1/2+y,1/2-z   | -2.6                           | 3.8                                                   | non-specific                               |
| d11       | 2-x,1/2+y,1/2-z    | -2.6                           | 3.8                                                   | non-specific                               |
| d12       | 2-x,2-y,1-z        | -2.2                           | 3.2                                                   | non-specific                               |
| d13       | 1-x,-1/2+y,3/2-z   | -2.0                           | 3.0                                                   | non-specific                               |
| d14       | 1-x,1/2+y,3/2-z    | -2.0                           | 3.0                                                   | non-specific                               |

**Table S7.** Symmetry codes, binding types, interaction energies of the **monomeric** building unit with neighboring ones ( $E_{\text{int}}$ , kcal/mol) and the contribution of these energies to the total interaction energy (%) in the crystal of ibuprofen **form I** under pressure of **1.70 GPa**.

| Dimer     | Symmetry operation | $E_{\text{int}}$ ,<br>kcal/mol | Contribution to the<br>total interaction<br>energy, % | Interaction                                |
|-----------|--------------------|--------------------------------|-------------------------------------------------------|--------------------------------------------|
| <b>d1</b> | <b>1-x,-y,1-z</b>  | <b>-12.2</b>                   | <b>17.9</b>                                           | <b>O-H...O, 1.80 Å, 170°</b>               |
| d2        | x,3/2-y,-1/2+z     | -7.5                           | 10.9                                                  | C...H, 2.72 Å                              |
| d3        | x,3/2-y,1/2+z      | -7.5                           | 10.9                                                  | C...H, 2.72 Å                              |
| d4        | x,1/2-y,-1/2+z     | -6.3                           | 9.3                                                   | C-H... $\pi$ , 2.63 Å, 163°; C...H, 2.80 Å |
| d5        | x,1/2-y,1/2+z      | -6.3                           | 9.3                                                   | C-H... $\pi$ , 2.63 Å, 163°; C...H, 2.80 Å |
| d6        | 1-x,1-y,1-z        | -5.6                           | 8.1                                                   | non-specific                               |
| d7        | 2-x,1-y,1-z        | -4.7                           | 6.9                                                   | non-specific                               |
| d8        | x,-1+y,z           | -3.2                           | 4.7                                                   | non-specific                               |
| d9        | x,1+y,z            | -3.2                           | 4.7                                                   | non-specific                               |
| d10       | 2-x,-1/2+y,1/2-z   | -2.6                           | 3.8                                                   | H...H, 2.21 Å                              |
| d11       | 2-x,1/2+y,1/2-z    | -2.6                           | 3.8                                                   | H...H, 2.21 Å                              |
| d12       | 2-x,2-y,1-z        | -2.3                           | 3.4                                                   | H...H, 2.28 Å                              |
| d13       | 1-x,-1/2+y,3/2-z   | -2.1                           | 3.1                                                   | non-specific                               |
| d14       | 1-x,1/2+y,3/2-z    | -2.1                           | 3.1                                                   | non-specific                               |

**Table S8.** Symmetry codes, binding types, interaction energies of the **monomeric** building unit with neighboring ones ( $E_{\text{int}}$ , kcal/mol) and the contribution of these energies to the total interaction energy (%) in the crystal of ibuprofen **form I** under pressure of **1.89 GPa**.

| Dimer     | Symmetry operation    | $E_{\text{int}}$ ,<br>kcal/mol | Contribution to the<br>total interaction<br>energy, % | Interaction                                |
|-----------|-----------------------|--------------------------------|-------------------------------------------------------|--------------------------------------------|
| <b>d1</b> | <b>1-x,-y,1-z</b>     | <b>-10.7</b>                   | <b>16.1</b>                                           | <b>O-H...O, 1.77 Å, 170°</b>               |
| <b>d2</b> | <b>x,3/2-y,-1/2+z</b> | <b>-7.5</b>                    | <b>11.2</b>                                           | <b>C...H, 2.70 Å</b>                       |
| <b>d3</b> | <b>x,3/2-y,1/2+z</b>  | <b>-7.5</b>                    | <b>11.2</b>                                           | <b>C...H, 2.70 Å</b>                       |
| d4        | x,1/2-y,-1/2+z        | -6.4                           | 9.5                                                   | C-H... $\pi$ , 2.55 Å, 164°; C...H, 2.81 Å |
| d5        | x,1/2-y,1/2+z         | -6.4                           | 9.5                                                   | C-H... $\pi$ , 2.55 Å, 164°; C...H, 2.81 Å |
| d6        | 1-x,1-y,1-z           | -5.3                           | 8.0                                                   | O-H...O, 2.43 Å, 125°                      |
| d7        | 2-x,1-y,1-z           | -4.7                           | 7.1                                                   | non-specific                               |
| d8        | x,-1+y,z              | -3.2                           | 4.9                                                   | non-specific                               |
| d9        | x,1+y,z               | -3.2                           | 4.9                                                   | non-specific                               |
| d10       | 2-x,-1/2+y,1/2-z      | -2.7                           | 4.0                                                   | H...H, 2.23 Å                              |
| d11       | 2-x,1/2+y,1/2-z       | -2.7                           | 4.0                                                   | H...H, 2.23 Å                              |
| d12       | 2-x,2-y,1-z           | -2.3                           | 3.4                                                   | H...H, 2.22 Å                              |
| d13       | 1-x,-1/2+y,3/2-z      | -2.0                           | 3.0                                                   | non-specific                               |
| d14       | 1-x,1/2+y,3/2-z       | -2.0                           | 3.0                                                   | non-specific                               |

**Table S9.** Symmetry codes, binding types, interaction energies of the **monomeric** building unit with neighboring ones ( $E_{\text{int}}$ , kcal/mol) and the contribution of these energies to the total interaction energy (%) in the crystal of ibuprofen **form I** under pressure of **2.32 GPa**.

| Dimer     | Symmetry operation | $E_{\text{int}}$ ,<br>kcal/mol | Contribution to the<br>total interaction<br>energy, % | Interaction                                 |
|-----------|--------------------|--------------------------------|-------------------------------------------------------|---------------------------------------------|
| <b>d1</b> | <b>1-x,-y,1-z</b>  | <b>-11.7</b>                   | <b>17.5</b>                                           | <b>O-H...O, 1.80 Å, 168°</b>                |
| d2        | x,3/2-y,-1/2+z     | -7.5                           | 11.3                                                  | C...H, 2.70 Å, 2.88 Å; H...H, 2.33 Å        |
| d3        | x,3/2-y,1/2+z      | -7.5                           | 11.3                                                  | C...H, 2.70 Å, 2.88 Å; H...H, 2.33 Å        |
| d4        | x,1/2-y,-1/2+z     | -5.8                           | 8.7                                                   | C-H... $\pi$ , 2.48 Å, 164°; C...H, 2.73 Å; |
| d5        | x,1/2-y,1/2+z      | -5.8                           | 8.7                                                   | C-H... $\pi$ , 2.48 Å, 164°; C...H, 2.73 Å  |
| d6        | 1-x,1-y,1-z        | -5.4                           | 8.1                                                   | O-H...O, 2.43 Å, 124°                       |
| d7        | 2-x,1-y,1-z        | -4.8                           | 7.1                                                   | non-specific                                |
| d8        | x,-1+y,z           | -3.2                           | 4.9                                                   | non-specific                                |
| d9        | x,1+y,z            | -3.2                           | 4.9                                                   | non-specific                                |
| d10       | 2-x,-1/2+y,1/2-z   | -2.7                           | 4.0                                                   | H...H, 2.19 Å                               |
| d11       | 2-x,1/2+y,1/2-z    | -2.7                           | 4.0                                                   | H...H, 2.19 Å                               |
| d12       | 2-x,2-y,1-z        | -2.4                           | 3.5                                                   | H...H, 2.22 Å                               |
| d13       | 1-x,-1/2+y,3/2-z   | -2.0                           | 3.1                                                   | non-specific                                |
| d14       | 1-x,1/2+y,3/2-z    | -2.0                           | 3.1                                                   | non-specific                                |

**Table S10.** Symmetry codes, binding types, interaction energies of the **monomeric** building unit with neighboring ones ( $E_{\text{int}}$ , kcal/mol) and the contribution of these energies to the total interaction energy (%) in the crystal of ibuprofen **form I** under pressure of **2.65 GPa**.

| Dimer     | Symmetry operation | $E_{\text{int}}$ ,<br>kcal/mol | Contribution to the<br>total interaction<br>energy, % | Interaction                                                  |
|-----------|--------------------|--------------------------------|-------------------------------------------------------|--------------------------------------------------------------|
| <b>d1</b> | <b>1-x,-y,1-z</b>  | <b>-10.0</b>                   | <b>15.5</b>                                           | <b>O-H...O, 1.78 Å, 168°</b>                                 |
| d2        | x,3/2-y,-1/2+z     | -7.5                           | 11.6                                                  | C...H, 2.60 Å, 2.83 Å; H...H, 2.32 Å                         |
| d3        | x,3/2-y,1/2+z      | -7.5                           | 11.6                                                  | C...H, 2.60 Å, 2.83 Å; H...H, 2.32 Å                         |
| d4        | x,1/2-y,-1/2+z     | -5.9                           | 9.1                                                   | C-H... $\pi$ , 2.54 Å, 162°; C...H, 2.73 Å;<br>C...C, 3.41 Å |
| d5        | x,1/2-y,1/2+z      | -5.9                           | 9.1                                                   | C-H... $\pi$ , 2.54 Å, 162°; C...H, 2.73 Å;<br>C...C, 3.41 Å |
| d6        | 1-x,1-y,1-z        | -5.2                           | 8.0                                                   | O-H...O, 2.41 Å, 124°                                        |
| d7        | 2-x,1-y,1-z        | -4.8                           | 7.5                                                   | non-specific                                                 |
| d8        | x,-1+y,z           | -3.2                           | 5.0                                                   | non-specific                                                 |
| d9        | x,1+y,z            | -3.2                           | 5.0                                                   | non-specific                                                 |
| d10       | 2-x,-1/2+y,1/2-z   | -2.6                           | 4.1                                                   | H...H, 2.16 Å, 2.34 Å                                        |
| d11       | 2-x,1/2+y,1/2-z    | -2.6                           | 4.1                                                   | H...H, 2.16 Å, 2.34 Å                                        |
| d12       | 2-x,2-y,1-z        | -2.4                           | 3.7                                                   | H...H, 2.22 Å                                                |
| d13       | 1-x,-1/2+y,3/2-z   | -1.9                           | 3.0                                                   | non-specific                                                 |
| d14       | 1-x,1/2+y,3/2-z    | -1.9                           | 3.0                                                   | non-specific                                                 |

**Table S11.** Symmetry codes, binding types, interaction energies of the **monomeric** building unit with neighboring ones ( $E_{\text{int}}$ , kcal/mol) and the contribution of these energies to the total interaction energy (%) in the crystal of ibuprofen **form I** under pressure of **3.46 GPa**.

| Dimer     | Symmetry operation | $E_{\text{int}}$ ,<br>kcal/mol | Contribution to the<br>total interaction<br>energy, % | Interaction                                                          |
|-----------|--------------------|--------------------------------|-------------------------------------------------------|----------------------------------------------------------------------|
| <b>d1</b> | <b>1-x,-y,1-z</b>  | <b>-11.9</b>                   | <b>18.4</b>                                           | <b>O-H...O, 1.76 Å, 167°</b>                                         |
| d2        | x,3/2-y,-1/2+z     | -7.4                           | 11.5                                                  | C...H, 2.53 Å, 2.75 Å, 2.85 Å;<br>H...H, 2.27 Å, 2.32 Å              |
| d3        | x,3/2-y,1/2+z      | -7.4                           | 11.5                                                  | C...H, 2.53 Å, 2.75 Å, 2.85 Å;<br>H...H, 2.27 Å, 2.32 Å              |
| d4        | x,1/2-y,-1/2+z     | -5.1                           | 7.9                                                   | C-H... $\pi$ , 2.43 Å, 163°; C...H, 2.63 Å;<br>C...C, 3.31 Å, 3.39 Å |
| d5        | x,1/2-y,1/2+z      | -5.1                           | 7.9                                                   | C-H... $\pi$ , 2.43 Å, 163°; C...H, 2.63 Å;<br>C...C, 3.31 Å, 3.39 Å |
| d6        | 1-x,1-y,1-z        | -5.0                           | 7.7                                                   | O-H...O, 2.41 Å, 123°                                                |
| d7        | 2-x,1-y,1-z        | -4.9                           | 7.6                                                   | non-specific                                                         |
| d8        | x,-1+y,z           | -3.3                           | 5.1                                                   | C...C, 3.40 Å                                                        |
| d9        | x,1+y,z            | -3.3                           | 5.1                                                   | C...C, 3.40 Å                                                        |
| d10       | 2-x,-1/2+y,1/2-z   | -2.5                           | 3.9                                                   | H...H, 2.10 Å, 2.31 Å; C...H, 2.85 Å,<br>2.88 Å                      |
| d11       | 2-x,1/2+y,1/2-z    | -2.5                           | 3.9                                                   | H...H, 2.10 Å, 2.31 Å; C...H, 2.85 Å,<br>2.88 Å                      |
| d12       | 2-x,2-y,1-z        | -2.4                           | 3.7                                                   | H...H, 2.15 Å; C...H, 2.87 Å                                         |
| d13       | 1-x,-1/2+y,3/2-z   | -1.9                           | 3.0                                                   | non-specific                                                         |
| d14       | 1-x,1/2+y,3/2-z    | -1.9                           | 3.0                                                   | non-specific                                                         |

**Table S12.** Symmetry codes, binding types, interaction energies of the **monomeric** building unit with neighboring ones ( $E_{\text{int}}$ , kcal/mol) and the contribution of these energies to the total interaction energy (%) in the crystal of ibuprofen **form I** under pressure of **4.00 GPa**.

| Dimer     | Symmetry operation | $E_{\text{int}}$ ,<br>kcal/mol | Contribution to the<br>total interaction<br>energy, % | Interaction                                                          |
|-----------|--------------------|--------------------------------|-------------------------------------------------------|----------------------------------------------------------------------|
| <b>d1</b> | <b>1-x,-y,1-z</b>  | <b>-9.9</b>                    | <b>15.9</b>                                           | <b>O-H...O, 1.74 Å, 167°</b>                                         |
| d2        | x,3/2-y,-1/2+z     | -7.3                           | 11.7                                                  | C...H, 2.50 Å, 2.76 Å, 2.85 Å, 2.86 Å;<br>H...H, 2.25 Å, 2.25 Å      |
| d3        | x,3/2-y,1/2+z      | -7.3                           | 11.7                                                  | C...H, 2.50 Å, 2.76 Å, 2.85 Å, 2.86 Å;<br>H...H, 2.25 Å, 2.25 Å      |
| d4        | 1-x,1-y,1-z        | -5.1                           | 8.3                                                   | O-H...O, 2.39 Å, 124°; O-H...O, 2.41<br>Å, 122°                      |
| d5        | x,1/2-y,-1/2+z     | -5.0                           | 8.0                                                   | C-H... $\pi$ , 2.40 Å, 163°; C...H, 2.61 Å;<br>C...C, 3.31 Å, 3.34 Å |
| d6        | x,1/2-y,1/2+z      | -5.0                           | 8.0                                                   | C-H... $\pi$ , 2.40 Å, 163°; C...H, 2.61 Å;<br>C...C, 3.31 Å, 3.34 Å |
| d7        | 2-x,1-y,1-z        | -4.9                           | 7.9                                                   | non-specific                                                         |
| d8        | x,-1+y,z           | -3.2                           | 5.1                                                   | C...C, 3.33 Å; C...H, 2.86 Å                                         |
| d9        | x,1+y,z            | -3.2                           | 5.1                                                   | C...C, 3.33 Å; C...H, 2.86 Å                                         |
| d10       | 2-x,-1/2+y,1/2-z   | -2.5                           | 4.1                                                   | H...H, 2.11 Å, 2.29 Å; C...H, 2.84 Å                                 |
| d11       | 2-x,1/2+y,1/2-z    | -2.5                           | 4.1                                                   | H...H, 2.11 Å, 2.29 Å; C...H, 2.84 Å                                 |
| d12       | 2-x,2-y,1-z        | -2.4                           | 3.9                                                   | H...H, 2.13 Å; C...H, 2.84 Å                                         |
| d13       | 1-x,-1/2+y,3/2-z   | -1.9                           | 3.0                                                   | non-specific                                                         |
| d14       | 1-x,1/2+y,3/2-z    | -1.9                           | 3.0                                                   | non-specific                                                         |

**Table S13.** Symmetry codes, binding types, interaction energies of the **dimeric** building unit with neighboring ones ( $E_{\text{int}}$ , kcal/mol) and the contribution of these energies to the total interaction energy (%) in the crystal of ibuprofen **form I** under pressure of **0.23 GPa**.

| Dimer | Symmetry operation    | $E_{\text{int}}$ ,<br>kcal/mol | Contribution to the<br>total interaction<br>energy, % | Interaction                 |
|-------|-----------------------|--------------------------------|-------------------------------------------------------|-----------------------------|
| dd1   | $x, -1+y, z$          | -10.8                          | 10.5                                                  | non-specific                |
| dd2   | $x, 1+y, z$           | -10.8                          | 10.5                                                  | non-specific                |
| dd3   | $x, -1/2-y, -1/2+z$   | -8.9                           | 8.7                                                   | C-H... $\pi$ , 2.77 Å, 165° |
| dd4   | $x, -1/2-y, 1/2+z$    | -8.9                           | 8.7                                                   | C-H... $\pi$ , 2.77 Å, 165° |
| dd5   | $x, 1/2-y, -1/2+z$    | -8.9                           | 8.7                                                   | C-H... $\pi$ , 2.77 Å, 165° |
| dd6   | $x, 1/2-y, 1/2+z$     | -8.9                           | 8.7                                                   | C-H... $\pi$ , 2.77 Å, 165° |
| dd7   | $x, -3/2-y, -1/2+z$   | -6.2                           | 6.0                                                   | non-specific                |
| dd8   | $x, -3/2-y, 1/2+z$    | -6.2                           | 6.0                                                   | non-specific                |
| dd9   | $x, 3/2-y, -1/2+z$    | -6.2                           | 6.0                                                   | non-specific                |
| dd10  | $x, 3/2-y, 1/2+z$     | -6.2                           | 6.0                                                   | non-specific                |
| dd11  | $-1+x, -1+y, z$       | -4.1                           | 3.9                                                   | non-specific                |
| dd12  | $1+x, 1+y, z$         | -4.1                           | 3.9                                                   | non-specific                |
| dd13  | $-1+x, -1/2-y, 1/2+z$ | -2.2                           | 2.2                                                   | non-specific                |
| dd14  | $-1+x, 1/2-y, 1/2+z$  | -2.2                           | 2.2                                                   | non-specific                |
| dd15  | $1+x, -1/2-y, -1/2+z$ | -2.2                           | 2.2                                                   | non-specific                |
| dd16  | $1+x, 1/2-y, -1/2+z$  | -2.2                           | 2.2                                                   | non-specific                |
| dd17  | $-1+x, -2+y, z$       | -1.9                           | 1.9                                                   | non-specific                |
| dd18  | $1+x, 2+y, z$         | -1.9                           | 1.9                                                   | non-specific                |



**Table S14.** Symmetry codes, binding types, interaction energies of the **dimeric** building unit with neighboring ones ( $E_{\text{int}}$ , kcal/mol) and the contribution of these energies to the total interaction energy (%) in the crystal of ibuprofen **form I** under pressure of **0.60 GPa**.

| Dimer | Symmetry operation    | $E_{\text{int}}$ ,<br>kcal/mol | Contribution to the<br>total interaction<br>energy, % | Interaction                 |
|-------|-----------------------|--------------------------------|-------------------------------------------------------|-----------------------------|
| dd1   | $x, -1+y, z$          | -11.2                          | 10.2                                                  | non-specific                |
| dd2   | $x, 1+y, z$           | -11.2                          | 10.2                                                  | non-specific                |
| dd3   | $x, -1/2-y, -1/2+z$   | -9.2                           | 8.4                                                   | C-H... $\pi$ , 2.69 Å, 164° |
| dd4   | $x, -1/2-y, 1/2+z$    | -9.2                           | 8.4                                                   | C-H... $\pi$ , 2.69 Å, 164° |
| dd5   | $x, 1/2-y, -1/2+z$    | -9.2                           | 8.4                                                   | C-H... $\pi$ , 2.69 Å, 164° |
| dd6   | $x, 1/2-y, 1/2+z$     | -9.2                           | 8.4                                                   | C-H... $\pi$ , 2.69 Å, 164° |
| dd7   | $x, -3/2-y, -1/2+z$   | -6.9                           | 6.3                                                   | non-specific                |
| dd8   | $x, -3/2-y, 1/2+z$    | -6.9                           | 6.3                                                   | non-specific                |
| dd9   | $x, 3/2-y, -1/2+z$    | -6.9                           | 6.3                                                   | non-specific                |
| dd10  | $x, 3/2-y, 1/2+z$     | -6.9                           | 6.3                                                   | non-specific                |
| dd11  | $-1+x, -1+y, z$       | -4.3                           | 3.9                                                   | non-specific                |
| dd12  | $1+x, 1+y, z$         | -4.3                           | 3.9                                                   | non-specific                |
| dd13  | $-1+x, -1/2-y, 1/2+z$ | -2.5                           | 2.3                                                   | non-specific                |
| dd14  | $-1+x, 1/2-y, 1/2+z$  | -2.5                           | 2.3                                                   | non-specific                |
| dd15  | $1+x, -1/2-y, -1/2+z$ | -2.5                           | 2.3                                                   | non-specific                |
| dd16  | $1+x, 1/2-y, -1/2+z$  | -2.5                           | 2.3                                                   | non-specific                |
| dd17  | $-1+x, -2+y, z$       | -2.1                           | 1.9                                                   | non-specific                |
| dd18  | $1+x, 2+y, z$         | -2.1                           | 1.9                                                   | non-specific                |

**Table S15.** Symmetry codes, binding types, interaction energies of the **dimeric** building unit with neighboring ones ( $E_{\text{int}}$ , kcal/mol) and the contribution of these energies to the total interaction energy (%) in the crystal of ibuprofen **form I** under pressure of **0.80 GPa**.

| Dimer | Symmetry operation    | $E_{\text{int}}$ ,<br>kcal/mol | Contribution to the<br>total interaction<br>energy, % | Interaction                 |
|-------|-----------------------|--------------------------------|-------------------------------------------------------|-----------------------------|
| dd1   | $x, -1+y, z$          | -11.3                          | 10.0                                                  | non-specific                |
| dd2   | $x, 1+y, z$           | -11.3                          | 10.0                                                  | non-specific                |
| dd3   | $x, -1/2-y, 1/2+z$    | -9.3                           | 8.3                                                   | C-H... $\pi$ , 2.65 Å, 166° |
| dd4   | $x, 1/2-y, 1/2+z$     | -9.3                           | 8.3                                                   | C-H... $\pi$ , 2.65 Å, 166° |
| dd5   | $x, 1/2-y, -1/2+z$    | -9.3                           | 8.3                                                   | C-H... $\pi$ , 2.65 Å, 166° |
| dd6   | $x, -1/2-y, -1/2+z$   | -9.3                           | 8.3                                                   | C-H... $\pi$ , 2.65 Å, 166° |
| dd7   | $x, 3/2-y, -1/2+z$    | -7.1                           | 6.4                                                   | C...H, 2.85 Å               |
| dd8   | $x, 3/2-y, 1/2+z$     | -7.1                           | 6.4                                                   | C...H, 2.85 Å               |
| dd9   | $x, -3/2-y, -1/2+z$   | -7.1                           | 6.4                                                   | C...H, 2.85 Å               |
| dd10  | $x, -3/2-y, 1/2+z$    | -7.1                           | 6.4                                                   | C...H, 2.85 Å               |
| dd11  | $1+x, 1+y, z$         | -4.5                           | 4.0                                                   | non-specific                |
| dd12  | $-1+x, -1+y, z$       | -4.5                           | 4.0                                                   | non-specific                |
| dd13  | $1+x, -1/2-y, -1/2+z$ | -2.6                           | 2.4                                                   | non-specific                |
| dd14  | $1+x, 1/2-y, -1/2+z$  | -2.6                           | 2.4                                                   | non-specific                |
| dd15  | $-1+x, -1/2-y, 1/2+z$ | -2.6                           | 2.4                                                   | non-specific                |
| dd16  | $-1+x, 1/2-y, 1/2+z$  | -2.6                           | 2.4                                                   | non-specific                |
| dd17  | $1+x, 2+y, z$         | -2.1                           | 1.9                                                   | H...H, 2.34 Å               |
| dd18  | $-1+x, -2+y, z$       | -2.1                           | 1.9                                                   | H...H, 2.34 Å               |

**Table S16.** Symmetry codes, binding types, interaction energies of the **dimeric** building unit with neighboring ones ( $E_{\text{int}}$ , kcal/mol) and the contribution of these energies to the total interaction energy (%) in the crystal of ibuprofen **form I** under pressure of **0.88 GPa**.

| Dimer | Symmetry operation    | $E_{\text{int}}$ ,<br>kcal/mol | Contribution to the<br>total interaction<br>energy, % | Interaction                                |
|-------|-----------------------|--------------------------------|-------------------------------------------------------|--------------------------------------------|
| dd1   | $x, -1+y, z$          | -11.3                          | 10.1                                                  | non-specific                               |
| dd2   | $x, 1+y, z$           | -11.3                          | 10.1                                                  | non-specific                               |
| dd3   | $x, -1/2-y, -1/2+z$   | -9.2                           | 8.2                                                   | C-H... $\pi$ , 2.68 Å, 164°; C...H, 2.88 Å |
| dd4   | $x, -1/2-y, 1/2+z$    | -9.2                           | 8.2                                                   | C-H... $\pi$ , 2.68 Å, 164°; C...H, 2.88 Å |
| dd5   | $x, 1/2-y, -1/2+z$    | -9.2                           | 8.2                                                   | C-H... $\pi$ , 2.68 Å, 164°; C...H, 2.88 Å |
| dd6   | $x, 1/2-y, 1/2+z$     | -9.2                           | 8.2                                                   | C-H... $\pi$ , 2.68 Å, 164°; C...H, 2.88 Å |
| dd7   | $x, -3/2-y, -1/2+z$   | -7.2                           | 6.4                                                   | C...H, 2.85 Å                              |
| dd8   | $x, -3/2-y, 1/2+z$    | -7.2                           | 6.4                                                   | C...H, 2.85 Å                              |
| dd9   | $x, 3/2-y, -1/2+z$    | -7.2                           | 6.4                                                   | C...H, 2.85 Å                              |
| dd10  | $x, 3/2-y, 1/2+z$     | -7.2                           | 6.4                                                   | C...H, 2.85 Å                              |
| dd11  | $-1+x, -1+y, z$       | -4.5                           | 4.0                                                   | non-specific                               |
| dd12  | $1+x, 1+y, z$         | -4.5                           | 4.0                                                   | non-specific                               |
| dd13  | $-1+x, -1/2-y, 1/2+z$ | -2.6                           | 2.3                                                   | non-specific                               |
| dd14  | $-1+x, 1/2-y, 1/2+z$  | -2.6                           | 2.3                                                   | non-specific                               |
| dd15  | $1+x, -1/2-y, -1/2+z$ | -2.6                           | 2.3                                                   | non-specific                               |
| dd16  | $1+x, 1/2-y, -1/2+z$  | -2.6                           | 2.3                                                   | non-specific                               |
| dd17  | $-1+x, -2+y, z$       | -2.2                           | 1.9                                                   | non-specific                               |
| dd18  | $1+x, 2+y, z$         | -2.2                           | 1.9                                                   | non-specific                               |

**Table S17.** Symmetry codes, binding types, interaction energies of the **dimeric** building unit with neighboring ones ( $E_{\text{int}}$ , kcal/mol) and the contribution of these energies to the total interaction energy (%) in the crystal of ibuprofen **form I** under pressure of **1.70 GPa**.

| Dimer | Symmetry operation    | $E_{\text{int}}$ ,<br>kcal/mol | Contribution to the<br>total interaction<br>energy, % | Interaction                                |
|-------|-----------------------|--------------------------------|-------------------------------------------------------|--------------------------------------------|
| dd1   | $x, -1+y, z$          | -11.3                          | 9.9                                                   | non-specific                               |
| dd2   | $x, 1+y, z$           | -11.3                          | 9.9                                                   | non-specific                               |
| dd3   | $x, -1/2-y, -1/2+z$   | -9.2                           | 8.0                                                   | C-H... $\pi$ , 2.63 Å, 163°; C...H, 2.80 Å |
| dd4   | $x, -1/2-y, 1/2+z$    | -9.2                           | 8.0                                                   | C-H... $\pi$ , 2.63 Å, 163°; C...H, 2.80 Å |
| dd5   | $x, 1/2-y, -1/2+z$    | -9.2                           | 8.0                                                   | C-H... $\pi$ , 2.63 Å, 163°; C...H, 2.80 Å |
| dd6   | $x, 1/2-y, 1/2+z$     | -9.2                           | 8.0                                                   | C-H... $\pi$ , 2.63 Å, 163°; C...H, 2.80 Å |
| dd7   | $x, -3/2-y, -1/2+z$   | -7.6                           | 6.6                                                   | C...H, 2.72 Å                              |
| dd8   | $x, -3/2-y, 1/2+z$    | -7.6                           | 6.6                                                   | C...H, 2.72 Å                              |
| dd9   | $x, 3/2-y, -1/2+z$    | -7.6                           | 6.6                                                   | C...H, 2.72 Å                              |
| dd10  | $x, 3/2-y, 1/2+z$     | -7.6                           | 6.6                                                   | C...H, 2.72 Å                              |
| dd11  | $-1+x, -1+y, z$       | -4.8                           | 4.2                                                   | non-specific                               |
| dd12  | $1+x, 1+y, z$         | -4.8                           | 4.2                                                   | non-specific                               |
| dd13  | $-1+x, -1/2-y, 1/2+z$ | -2.7                           | 2.3                                                   | H...H, 2.21 Å                              |
| dd14  | $-1+x, 1/2-y, 1/2+z$  | -2.7                           | 2.3                                                   | H...H, 2.21 Å                              |
| dd15  | $1+x, -1/2-y, -1/2+z$ | -2.7                           | 2.3                                                   | H...H, 2.21 Å                              |
| dd16  | $1+x, 1/2-y, -1/2+z$  | -2.7                           | 2.3                                                   | H...H, 2.21 Å                              |
| dd17  | $-1+x, -2+y, z$       | -2.3                           | 2.0                                                   | H...H, 2.28 Å                              |
| dd18  | $1+x, 2+y, z$         | -2.3                           | 2.0                                                   | H...H, 2.28 Å                              |

**Table S18.** Symmetry codes, binding types, interaction energies of the **dimeric** building unit with neighboring ones ( $E_{\text{int}}$ , kcal/mol) and the contribution of these energies to the total interaction energy (%) in the crystal of ibuprofen **form I** under pressure of **1.89 GPa**.

| Dimer | Symmetry operation    | $E_{\text{int}}$ ,<br>kcal/mol | Contribution to the<br>total interaction<br>energy, % | Interaction                                |
|-------|-----------------------|--------------------------------|-------------------------------------------------------|--------------------------------------------|
| dd1   | $x, -1+y, z$          | -11.2                          | 9.8                                                   | O-H...O, 2.43 Å, 125°                      |
| dd2   | $x, 1+y, z$           | -11.2                          | 9.8                                                   | O-H...O, 2.43 Å, 125°                      |
| dd3   | $x, -1/2-y, 1/2+z$    | -9.1                           | 8.0                                                   | C-H... $\pi$ , 2.55 Å, 164°; C...H, 2.81 Å |
| dd4   | $x, 1/2-y, -1/2+z$    | -9.1                           | 8.0                                                   | C-H... $\pi$ , 2.55 Å, 164°; C...H, 2.81 Å |
| dd5   | $x, 1/2-y, 1/2+z$     | -9.1                           | 8.0                                                   | C-H... $\pi$ , 2.55 Å, 164°; C...H, 2.81 Å |
| dd6   | $x, -1/2-y, -1/2+z$   | -9.1                           | 8.0                                                   | C-H... $\pi$ , 2.55 Å, 164°; C...H, 2.81 Å |
| dd7   | $x, 3/2-y, -1/2+z$    | -7.6                           | 6.6                                                   | C...H, 2.70 Å                              |
| dd8   | $x, 3/2-y, 1/2+z$     | -7.6                           | 6.6                                                   | C...H, 2.70 Å                              |
| dd9   | $x, -3/2-y, -1/2+z$   | -7.6                           | 6.6                                                   | C...H, 2.70 Å                              |
| dd10  | $x, -3/2-y, 1/2+z$    | -7.6                           | 6.6                                                   | C...H, 2.70 Å                              |
| dd11  | $1+x, 1+y, z$         | -4.8                           | 4.2                                                   | non-specific                               |
| dd12  | $-1+x, -1+y, z$       | -4.8                           | 4.2                                                   | non-specific                               |
| dd13  | $1+x, -1/2-y, -1/2+z$ | -2.7                           | 2.4                                                   | H...H, 2.23 Å                              |
| dd14  | $1+x, 1/2-y, -1/2+z$  | -2.7                           | 2.4                                                   | H...H, 2.23 Å                              |
| dd15  | $-1+x, -1/2-y, 1/2+z$ | -2.7                           | 2.4                                                   | H...H, 2.23 Å                              |
| dd16  | $-1+x, 1/2-y, 1/2+z$  | -2.7                           | 2.4                                                   | H...H, 2.23 Å                              |
| dd17  | $1+x, 2+y, z$         | -2.3                           | 2.0                                                   | H...H, 2.22 Å                              |
| dd18  | $-1+x, -2+y, z$       | -2.3                           | 2.0                                                   | H...H, 2.22 Å                              |

**Table S19.** Symmetry codes, binding types, interaction energies of the **dimeric** building unit with neighboring ones ( $E_{\text{int}}$ , kcal/mol) and the contribution of these energies to the total interaction energy (%) in the crystal of ibuprofen **form I** under pressure of **2.32 GPa**.

| Dimer | Symmetry operation    | $E_{\text{int}}$ ,<br>kcal/mol | Contribution to the<br>total interaction<br>energy, % | Interaction                                |
|-------|-----------------------|--------------------------------|-------------------------------------------------------|--------------------------------------------|
| dd1   | $x, -1+y, z$          | -11.2                          | 9.9                                                   | O-H...O, 2.43 Å, 124°                      |
| dd2   | $x, 1+y, z$           | -11.2                          | 9.9                                                   | O-H...O, 2.43 Å, 124°                      |
| dd3   | $x, -1/2-y, 1/2+z$    | -8.6                           | 7.7                                                   | C-H... $\pi$ , 2.48 Å, 164°; C...H, 2.73 Å |
| dd4   | $x, 1/2-y, 1/2+z$     | -8.6                           | 7.7                                                   | C-H... $\pi$ , 2.48 Å, 164°; C...H, 2.73 Å |
| dd5   | $x, 1/2-y, -1/2+z$    | -8.6                           | 7.7                                                   | C-H... $\pi$ , 2.48 Å, 164°; C...H, 2.73 Å |
| dd6   | $x, -1/2-y, -1/2+z$   | -8.6                           | 7.7                                                   | C-H... $\pi$ , 2.48 Å, 164°; C...H, 2.73 Å |
| dd7   | $x, 3/2-y, -1/2+z$    | -7.6                           | 6.8                                                   | C...H, 2.70 Å, 2.88 Å; H...H, 2.33 Å       |
| dd8   | $x, 3/2-y, 1/2+z$     | -7.6                           | 6.8                                                   | C...H, 2.70 Å, 2.88 Å; H...H, 2.33 Å       |
| dd9   | $x, -3/2-y, -1/2+z$   | -7.6                           | 6.8                                                   | C...H, 2.70 Å, 2.88 Å; H...H, 2.33 Å       |
| dd10  | $x, -3/2-y, 1/2+z$    | -7.6                           | 6.8                                                   | C...H, 2.70 Å, 2.88 Å; H...H, 2.33 Å       |
| dd11  | $1+x, 1+y, z$         | -4.9                           | 4.3                                                   | non-specific                               |
| dd12  | $-1+x, -1+y, z$       | -4.9                           | 4.3                                                   | non-specific                               |
| dd13  | $1+x, -1/2-y, -1/2+z$ | -2.7                           | 2.4                                                   | H...H, 2.19 Å                              |
| dd14  | $1+x, 1/2-y, -1/2+z$  | -2.7                           | 2.4                                                   | H...H, 2.19 Å                              |
| dd15  | $-1+x, -1/2-y, 1/2+z$ | -2.7                           | 2.4                                                   | H...H, 2.19 Å                              |
| dd16  | $-1+x, 1/2-y, 1/2+z$  | -2.7                           | 2.4                                                   | H...H, 2.19 Å                              |
| dd17  | $1+x, 2+y, z$         | -2.4                           | 2.1                                                   | H...H, 2.22 Å                              |
| dd18  | $-1+x, -2+y, z$       | -2.4                           | 2.1                                                   | H...H, 2.22 Å                              |

**Table S20.** Symmetry codes, binding types, interaction energies of the **dimeric** building unit with neighboring ones ( $E_{\text{int}}$ , kcal/mol) and the contribution of these energies to the total interaction energy (%) in the crystal of ibuprofen **form I** under pressure of **2.65 GPa**.

| Dimer | Symmetry operation    | $E_{\text{int}}$ ,<br>kcal/mol | Contribution to the<br>total interaction<br>energy, % | Interaction                                                  |
|-------|-----------------------|--------------------------------|-------------------------------------------------------|--------------------------------------------------------------|
| dd1   | $x, -1+y, z$          | -11.0                          | 9.8                                                   | O-H...O, 2.41 Å, 124°                                        |
| dd2   | $x, 1+y, z$           | -11.0                          | 9.8                                                   | O-H...O, 2.41 Å, 124°                                        |
| dd3   | $x, -1/2-y, -1/2+z$   | -8.7                           | 7.7                                                   | C-H... $\pi$ , 2.54 Å, 162°; C...H, 2.73 Å;<br>C...C, 3.41 Å |
| dd4   | $x, -1/2-y, 1/2+z$    | -8.7                           | 7.7                                                   | C-H... $\pi$ , 2.54 Å, 162°; C...H, 2.73 Å;<br>C...C, 3.41 Å |
| dd5   | $x, 1/2-y, -1/2+z$    | -8.7                           | 7.7                                                   | C-H... $\pi$ , 2.54 Å, 162°; C...H, 2.73 Å;<br>C...C, 3.41 Å |
| dd6   | $x, 1/2-y, 1/2+z$     | -8.7                           | 7.7                                                   | C-H... $\pi$ , 2.54 Å, 162°; C...H, 2.73 Å;<br>C...C, 3.41 Å |
| dd7   | $x, -3/2-y, -1/2+z$   | -7.6                           | 6.7                                                   | C...H, 2.60 Å, 2.83 Å; H...H, 2.32 Å                         |
| dd8   | $x, -3/2-y, 1/2+z$    | -7.6                           | 6.7                                                   | C...H, 2.60 Å, 2.83 Å; H...H, 2.32 Å                         |
| dd9   | $x, 3/2-y, -1/2+z$    | -7.6                           | 6.7                                                   | C...H, 2.60 Å, 2.83 Å; H...H, 2.32 Å                         |
| dd10  | $x, 3/2-y, 1/2+z$     | -7.6                           | 6.7                                                   | C...H, 2.60 Å, 2.83 Å; H...H, 2.32 Å                         |
| dd11  | $-1+x, -1+y, z$       | -4.9                           | 4.4                                                   | non-specific                                                 |
| dd12  | $1+x, 1+y, z$         | -4.9                           | 4.4                                                   | non-specific                                                 |
| dd13  | $-1+x, -1/2-y, 1/2+z$ | -2.7                           | 2.4                                                   | H...H, 2.16 Å, 2.34 Å                                        |
| dd14  | $-1+x, 1/2-y, 1/2+z$  | -2.7                           | 2.4                                                   | H...H, 2.16 Å, 2.34 Å                                        |
| dd15  | $1+x, -1/2-y, -1/2+z$ | -2.7                           | 2.4                                                   | H...H, 2.16 Å, 2.34 Å                                        |
| dd16  | $1+x, 1/2-y, -1/2+z$  | -2.7                           | 2.4                                                   | H...H, 2.16 Å, 2.34 Å                                        |
| dd17  | $-1+x, -2+y, z$       | -2.4                           | 2.1                                                   | H...H, 2.22 Å                                                |
| dd18  | $1+x, 2+y, z$         | -2.4                           | 2.1                                                   | H...H, 2.22 Å                                                |

**Table S21.** Symmetry codes, binding types, interaction energies of the **dimeric** building unit with neighboring ones ( $E_{\text{int}}$ , kcal/mol) and the contribution of these energies to the total interaction energy (%) in the crystal of ibuprofen **form I** under pressure of **3.46 GPa**.

| Dimer | Symmetry operation    | $E_{\text{int}}$ ,<br>kcal/mol | Contribution to the<br>total interaction<br>energy, % | Interaction                                                          |
|-------|-----------------------|--------------------------------|-------------------------------------------------------|----------------------------------------------------------------------|
| dd1   | $x, -1+y, z$          | -10.8                          | 10.0                                                  | O-H...O, 2.41 Å, 123°; C...C, 3.40 Å                                 |
| dd2   | $x, 1+y, z$           | -10.8                          | 10.0                                                  | O-H...O, 2.41 Å, 123°; C...C, 3.40 Å                                 |
| dd3   | $x, -1/2-y, -1/2+z$   | -7.9                           | 7.3                                                   | C-H... $\pi$ , 2.43 Å, 163°; C...H, 2.63 Å;<br>C...C, 3.31 Å, 3.39 Å |
| dd4   | $x, -1/2-y, 1/2+z$    | -7.9                           | 7.3                                                   | C-H... $\pi$ , 2.43 Å, 163°; C...H, 2.63 Å;<br>C...C, 3.31 Å, 3.39 Å |
| dd5   | $x, 1/2-y, -1/2+z$    | -7.9                           | 7.3                                                   | C-H... $\pi$ , 2.43 Å, 163°; C...H, 2.63 Å;<br>C...C, 3.31 Å, 3.39 Å |
| dd6   | $x, 1/2-y, 1/2+z$     | -7.9                           | 7.3                                                   | C-H... $\pi$ , 2.43 Å, 163°; C...H, 2.63 Å;<br>C...C, 3.31 Å, 3.39 Å |
| dd7   | $x, -3/2-y, -1/2+z$   | -7.5                           | 7.0                                                   | C...H, 2.53 Å, 2.75 Å, 2.85 Å;<br>H...H, 2.27 Å, 2.32 Å              |
| dd8   | $x, -3/2-y, 1/2+z$    | -7.5                           | 7.0                                                   | C...H, 2.53 Å, 2.75 Å, 2.85 Å;<br>H...H, 2.27 Å, 2.32 Å              |
| dd9   | $x, 3/2-y, -1/2+z$    | -7.5                           | 7.0                                                   | C...H, 2.53 Å, 2.75 Å, 2.85 Å;<br>H...H, 2.27 Å, 2.32 Å              |
| dd10  | $x, 3/2-y, 1/2+z$     | -7.5                           | 7.0                                                   | C...H, 2.53 Å, 2.75 Å, 2.85 Å;<br>H...H, 2.27 Å, 2.32 Å              |
| dd11  | $-1+x, -1+y, z$       | -5.0                           | 4.6                                                   | non-specific                                                         |
| dd12  | $1+x, 1+y, z$         | -5.0                           | 4.6                                                   | non-specific                                                         |
| dd13  | $-1+x, -1/2-y, 1/2+z$ | -2.5                           | 2.3                                                   | H...H, 2.10 Å, 2.31 Å; C...H, 2.85 Å,<br>2.88 Å                      |
| dd14  | $-1+x, 1/2-y, 1/2+z$  | -2.5                           | 2.3                                                   | H...H, 2.10 Å, 2.31 Å; C...H, 2.85 Å,<br>2.88 Å                      |
| dd15  | $1+x, -1/2-y, -1/2+z$ | -2.5                           | 2.3                                                   | H...H, 2.10 Å, 2.31 Å; C...H, 2.85 Å,<br>2.88 Å                      |
| dd16  | $1+x, 1/2-y, -1/2+z$  | -2.5                           | 2.3                                                   | H...H, 2.10 Å, 2.31 Å; C...H, 2.85 Å,<br>2.88 Å                      |
| dd17  | $-1+x, -2+y, z$       | -2.4                           | 2.2                                                   | H...H, 2.15 Å; C...H, 2.87 Å                                         |
| dd18  | $1+x, 2+y, z$         | -2.4                           | 2.2                                                   | H...H, 2.15 Å; C...H, 2.87 Å                                         |



**Table S22.** Symmetry codes, binding types, interaction energies of the **dimeric** building unit with neighboring ones ( $E_{\text{int}}$ , kcal/mol) and the contribution of these energies to the total interaction energy (%) in the crystal of ibuprofen **form I** under pressure of **4.00 GPa**.

| Dimer | Symmetry operation    | $E_{\text{int}}$ ,<br>kcal/mol | Contribution to the<br>total interaction<br>energy, % | Interaction                                                                   |
|-------|-----------------------|--------------------------------|-------------------------------------------------------|-------------------------------------------------------------------------------|
| dd1   | $x, -1+y, z$          | -10.8                          | 10.0                                                  | O-H...O, 2.39 Å, 124°; O-H...O, 2.41 Å, 122°;<br>C...C, 3.33 Å; C...H, 2.86 Å |
| dd2   | $x, 1+y, z$           | -10.8                          | 10.0                                                  | O-H...O, 2.39 Å, 124°; O-H...O, 2.41 Å, 122°;<br>C...C, 3.33 Å; C...H, 2.86 Å |
| dd3   | $x, -1/2-y, -1/2+z$   | -7.8                           | 7.2                                                   | C-H... $\pi$ , 2.40 Å, 163°; C...H, 2.61 Å;<br>C...C, 3.31 Å, 3.34 Å          |
| dd4   | $x, -1/2-y, 1/2+z$    | -7.8                           | 7.2                                                   | C-H... $\pi$ , 2.40 Å, 163°; C...H, 2.61 Å;<br>C...C, 3.31 Å, 3.34 Å          |
| dd5   | $x, 1/2-y, -1/2+z$    | -7.8                           | 7.2                                                   | C-H... $\pi$ , 2.40 Å, 163°; C...H, 2.61 Å;<br>C...C, 3.31 Å, 3.34 Å          |
| dd6   | $x, 1/2-y, 1/2+z$     | -7.8                           | 7.2                                                   | C-H... $\pi$ , 2.40 Å, 163°; C...H, 2.61 Å;<br>C...C, 3.31 Å, 3.34 Å          |
| dd7   | $x, -3/2-y, -1/2+z$   | -7.4                           | 6.9                                                   | C...H, 2.50 Å, 2.76 Å, 2.85 Å, 2.86 Å;<br>H...H, 2.25 Å, 2.25 Å               |
| dd8   | $x, -3/2-y, 1/2+z$    | -7.4                           | 6.9                                                   | C...H, 2.50 Å, 2.76 Å, 2.85 Å, 2.86 Å;<br>H...H, 2.25 Å, 2.25 Å               |
| dd9   | $x, 3/2-y, -1/2+z$    | -7.4                           | 6.9                                                   | C...H, 2.50 Å, 2.76 Å, 2.85 Å, 2.86 Å;<br>H...H, 2.25 Å, 2.25 Å               |
| dd10  | $x, 3/2-y, 1/2+z$     | -7.4                           | 6.9                                                   | C...H, 2.50 Å, 2.76 Å, 2.85 Å, 2.86 Å;<br>H...H, 2.25 Å, 2.25 Å               |
| dd11  | $-1+x, -1+y, z$       | -5.1                           | 4.7                                                   | non-specific                                                                  |
| dd12  | $1+x, 1+y, z$         | -5.1                           | 4.7                                                   | non-specific                                                                  |
| dd13  | $-1+x, -1/2-y, 1/2+z$ | -2.6                           | 2.4                                                   | H...H, 2.11 Å, 2.29 Å; C...H, 2.84 Å                                          |
| dd14  | $-1+x, 1/2-y, 1/2+z$  | -2.6                           | 2.4                                                   | H...H, 2.11 Å, 2.29 Å; C...H, 2.84 Å                                          |
| dd15  | $1+x, -1/2-y, -1/2+z$ | -2.6                           | 2.4                                                   | H...H, 2.11 Å, 2.29 Å; C...H, 2.84 Å                                          |
| dd16  | $1+x, 1/2-y, -1/2+z$  | -2.6                           | 2.4                                                   | H...H, 2.11 Å, 2.29 Å; C...H, 2.84 Å                                          |
| dd17  | $-1+x, -2+y, z$       | -2.4                           | 2.3                                                   | H...H, 2.13 Å; C...H, 2.84 Å                                                  |
| dd18  | $1+x, 2+y, z$         | -2.4                           | 2.3                                                   | H...H, 2.13 Å; C...H, 2.84 Å                                                  |

**Table S23. Minimal interatomic distances and absolute deviation (AD) of their determination for the different step sizes in comparison to the high-precision computation with a step size of 1/1000 of a translation occurring during the displacement of the **dimeric** building units in polymorph **I** of ibuprofen along **[001]** and **[010]** directions of layers parallel to the **(100)** plane.**

| Shift direction | Step size<br>(Part of a translation) | Minimal interatomic distance $\pm$ AD, Å |  |                     |  |                          |  |                          |  |                          |  |                          |  |                 |  |       |  |                     |  |       |  |
|-----------------|--------------------------------------|------------------------------------------|--|---------------------|--|--------------------------|--|--------------------------|--|--------------------------|--|--------------------------|--|-----------------|--|-------|--|---------------------|--|-------|--|
|                 |                                      | Ambient pressure                         |  | 0.23 GPa            |  | 0.60 GPa                 |  | 0.80 GPa                 |  | 0.88 GPa                 |  | 1.70 GPa                 |  |                 |  |       |  |                     |  |       |  |
| [010] (100)     | 0.20                                 | 0.360                                    |  | 0.275               |  | 0.381                    |  | 0.025                    |  | 0.497                    |  | 0.306                    |  |                 |  |       |  |                     |  |       |  |
|                 | 0.10                                 | 0.082                                    |  | 0.038               |  | 0.074                    |  | 0.025                    |  | 0.107                    |  | 0.054                    |  |                 |  |       |  |                     |  |       |  |
|                 | 0.05                                 | $0.265^{\beta}$<br>$\pm$                 |  | $0.446^{\beta} \pm$ |  | $0.234^{\beta}$<br>$\pm$ |  | $0.543^{\beta}$<br>$\pm$ |  | $0.096^{\beta}$<br>$\pm$ |  | $0.153^{\beta}$<br>$\pm$ |  |                 |  |       |  |                     |  |       |  |
|                 | 0.04                                 | 0.051                                    |  | 0.033               |  | 0.064                    |  | 0.025                    |  | 0.107                    |  | 0.054                    |  |                 |  |       |  |                     |  |       |  |
|                 | 0.02                                 | 0.008                                    |  | 0.004               |  | 0.005                    |  | 0.017                    |  | 0.003                    |  | 0.000                    |  |                 |  |       |  |                     |  |       |  |
| [001] (100)     | 0.20                                 | 0.039                                    |  | 0.009               |  | 0.042                    |  | 0.082                    |  | 0.055                    |  | 0.106                    |  |                 |  |       |  |                     |  |       |  |
|                 | 0.10                                 | 0.039                                    |  | 0.009               |  | 0.042                    |  | 0.082                    |  | 0.055                    |  | 0.106                    |  |                 |  |       |  |                     |  |       |  |
|                 | 0.05                                 | $1.548 \pm$                              |  | $0.011$             |  | $1.450 \pm$              |  | $0.009$                  |  | $1.286 \pm$              |  | $0.014$                  |  |                 |  |       |  |                     |  |       |  |
|                 | 0.04                                 | 0.002                                    |  | 0.009               |  | 0.003                    |  | 0.001                    |  | 0.001                    |  | 0.003                    |  |                 |  |       |  |                     |  |       |  |
|                 | 0.02                                 | 0.002                                    |  | 0.009               |  | 0.003                    |  | 0.001                    |  | 0.001                    |  | 0.003                    |  |                 |  |       |  |                     |  |       |  |
| Shift direction | Step size<br>(Part of a translation) | Minimal interatomic distance (AD), Å     |  |                     |  |                          |  |                          |  |                          |  |                          |  |                 |  |       |  |                     |  |       |  |
|                 |                                      | 1.89 GPa                                 |  | 2.32 GPa            |  | 2.65 GPa                 |  | 3.46 GPa                 |  | 4.00 GPa                 |  |                          |  |                 |  |       |  |                     |  |       |  |
| [010] (100)     | 0.20                                 | $0.195^{\beta} \pm$                      |  | 0.264               |  | $0.243^{\beta} \pm$      |  | 0.116                    |  | $0.285^{\beta}$          |  | 0.034                    |  | $0.156^{\beta}$ |  | 0.051 |  | $0.207^{\beta} \pm$ |  | 0.038 |  |
|                 | 0.10                                 | 0.044                                    |  | 0.024               |  | $\pm$                    |  | 0.016                    |  | $\pm$                    |  | 0.051                    |  | $\pm$           |  | 0.038 |  |                     |  |       |  |

|             |      |               |               |               |               |         |       |
|-------------|------|---------------|---------------|---------------|---------------|---------|-------|
|             | 0.05 | 0.044         | 0.024         | 0.016         | 0.051         |         | 0.038 |
|             | 0.04 | 0.000         | 0.003         | 0.004         | 0.051         |         | 0.038 |
|             | 0.02 | 0.000         | 0.003         | 0.001         | 0.000         |         | 0.000 |
| [001] (100) | 0.20 | 0.103         | 0.132         | 0.157         | 0.206         |         | 0.195 |
|             | 0.10 | 0.103         | 0.126         | 0.112         | 0.097         |         | 0.118 |
|             | 0.05 | 0.966 ± 0.001 | 0.907 ± 0.000 | 0.863 ± 0.001 | 0.747 ± 0.007 | 0.697 ± | 0.003 |
|             | 0.04 | 0.002         | 0.006         | 0.012         | 0.025         |         | 0.019 |
|             | 0.02 | 0.002         | 0.005         | 0.002         | 0.000         |         | 0.001 |

<sup>β</sup> Movements in the directions marked with red are improbable from the topological point of view because of the molecules overlapping during the translations.

**Table S24. Minimal differences between the interatomic distances and the corresponding sums of van der Waals radii ( $\delta$ ) and absolute deviation (AD) of their determination for the different step sizes in comparison to the high-precision computation with a step size of 1/1000 of a translation occurring during the displacement of the **dimeric** building units in polymorph **I** of ibuprofen along **[001]** and **[010]** directions of layers parallel to the **(100)** plane.**

| Shift direction | Step size<br>(Part of a translation) | $\delta \pm AD, \text{ \AA}$         |             |                                      |             |                                      |             |                                      |             |                                      |             |                                       |       |
|-----------------|--------------------------------------|--------------------------------------|-------------|--------------------------------------|-------------|--------------------------------------|-------------|--------------------------------------|-------------|--------------------------------------|-------------|---------------------------------------|-------|
|                 |                                      | Ambient pressure                     |             | 0.23 GPa                             |             | 0.60 GPa                             |             | 0.80 GPa                             |             | 0.88 GPa                             |             | 1.70 GPa                              |       |
| [010] (100)     | 0.20                                 |                                      | 0.169       |                                      | 0.089       |                                      | 0.158       |                                      | 0.131       |                                      | 0.193       |                                       | 0.118 |
|                 | 0.10                                 |                                      | 0.000       |                                      | 0.000       |                                      | 0.000       |                                      | 0.000       |                                      | 0.000       |                                       | 0.000 |
|                 | 0.05                                 | -2.107 <sup><math>\beta</math></sup> | 0.000       | -2.093 <sup><math>\beta</math></sup> | 0.000       | -2.200 <sup><math>\beta</math></sup> | 0.000       | -2.352 <sup><math>\beta</math></sup> | 0.000       | -2.300 <sup><math>\beta</math></sup> | 0.000       | -2.449 <sup><math>\beta</math></sup>  | 0.000 |
|                 | 0.04                                 | $\pm$                                | 0.010       | $\pm$                                | 0.009       | $\pm$                                | 0.010       | $\pm$                                | 0.011       | $\pm$                                | 0.011       | $\pm$                                 | 0.012 |
|                 | 0.02                                 |                                      | 0.000       |                                      | 0.000       |                                      | 0.000       |                                      | 0.000       |                                      | 0.000       |                                       | 0.000 |
| [001] (100)     | 0.20                                 |                                      | 0.039       |                                      | 0.009       |                                      | 0.042       |                                      | 0.082       |                                      | 0.055       |                                       | 0.109 |
|                 | 0.10                                 |                                      | 0.039       |                                      | 0.009       |                                      | 0.042       |                                      | 0.082       |                                      | 0.055       |                                       | 0.109 |
|                 | 0.05                                 | -0.632                               | $\pm$ 0.011 | -0.730                               | $\pm$ 0.009 | -0.894                               | $\pm$ 0.014 | -0.998                               | $\pm$ 0.002 | -0.991                               | $\pm$ 0.009 | -1.163 <sup><math>\gamma</math></sup> | 0.000 |
|                 | 0.04                                 |                                      | 0.002       |                                      | 0.009       |                                      | 0.003       |                                      | 0.001       |                                      | 0.001       |                                       | 0.003 |
|                 | 0.02                                 |                                      | 0.002       |                                      | 0.001       |                                      | 0.003       |                                      | 0.001       |                                      | 0.001       |                                       | 0.003 |
| Shift direction | Step size<br>(Part of a translation) | $\delta \pm AD, \text{ \AA}$         |             |                                      |             |                                      |             |                                      |             |                                      |             |                                       |       |
|                 |                                      | 1.89 GPa                             |             | 2.32 GPa                             |             | 2.65 GPa                             |             | 3.46 GPa                             |             | 4.00 GPa                             |             |                                       |       |
| [010] (100)     | 0.20                                 |                                      | 0.168       |                                      | 0.090       |                                      | 0.085       |                                      | 0.051       |                                      |             |                                       | 0.124 |
|                 | 0.10                                 | -2.499 <sup><math>\beta</math></sup> | 0.000       | -2.522 <sup><math>\beta</math></sup> | 0.000       | -2.557 <sup><math>\beta</math></sup> | 0.000       | -2.634 <sup><math>\beta</math></sup> | 0.003       | -2.669 <sup><math>\beta</math></sup> | $\pm$       |                                       | 0.000 |
|                 | 0.05                                 | $\pm$                                | 0.000       | $\pm$                                | 0.000       | $\pm$                                | 0.000       | $\pm$                                | 0.003       |                                      |             |                                       | 0.000 |

|             |      |                          |       |                          |       |                          |       |                          |       |                       |       |
|-------------|------|--------------------------|-------|--------------------------|-------|--------------------------|-------|--------------------------|-------|-----------------------|-------|
|             | 0.04 | 0.012                    | 0.013 | 0.013                    | 0.016 | 0.014                    |       |                          |       |                       |       |
|             | 0.02 | 0.000                    | 0.000 | 0.000                    | 0.000 | 0.000                    |       |                          |       |                       |       |
| [001] (100) | 0.20 | 0.103                    | 0.132 | 0.157                    | 0.206 | 0.195                    |       |                          |       |                       |       |
|             | 0.10 | 0.103                    | 0.126 | 0.112                    | 0.097 | 0.118                    |       |                          |       |                       |       |
|             | 0.05 | -1.214 $\gamma$<br>$\pm$ | 0.001 | -1.273 $\gamma$<br>$\pm$ | 0.000 | -1.317 $\gamma$<br>$\pm$ | 0.001 | -1.433 $\gamma$<br>$\pm$ | 0.007 | -1.483 $\gamma$ $\pm$ | 0.003 |
|             | 0.04 | 0.002                    | 0.006 | 0.012                    | 0.025 | 0.019                    |       |                          |       |                       |       |
|             | 0.02 | 0.002                    | 0.005 | 0.002                    | 0.000 | 0.001                    |       |                          |       |                       |       |

$\beta$  Movements in the directions marked with red are improbable from the topological point of view because of the molecules overlapping during the translations.

$\gamma$  Probability of movements in the directions marked with yellow are very low because of the compression of material / molecules rapprochement.

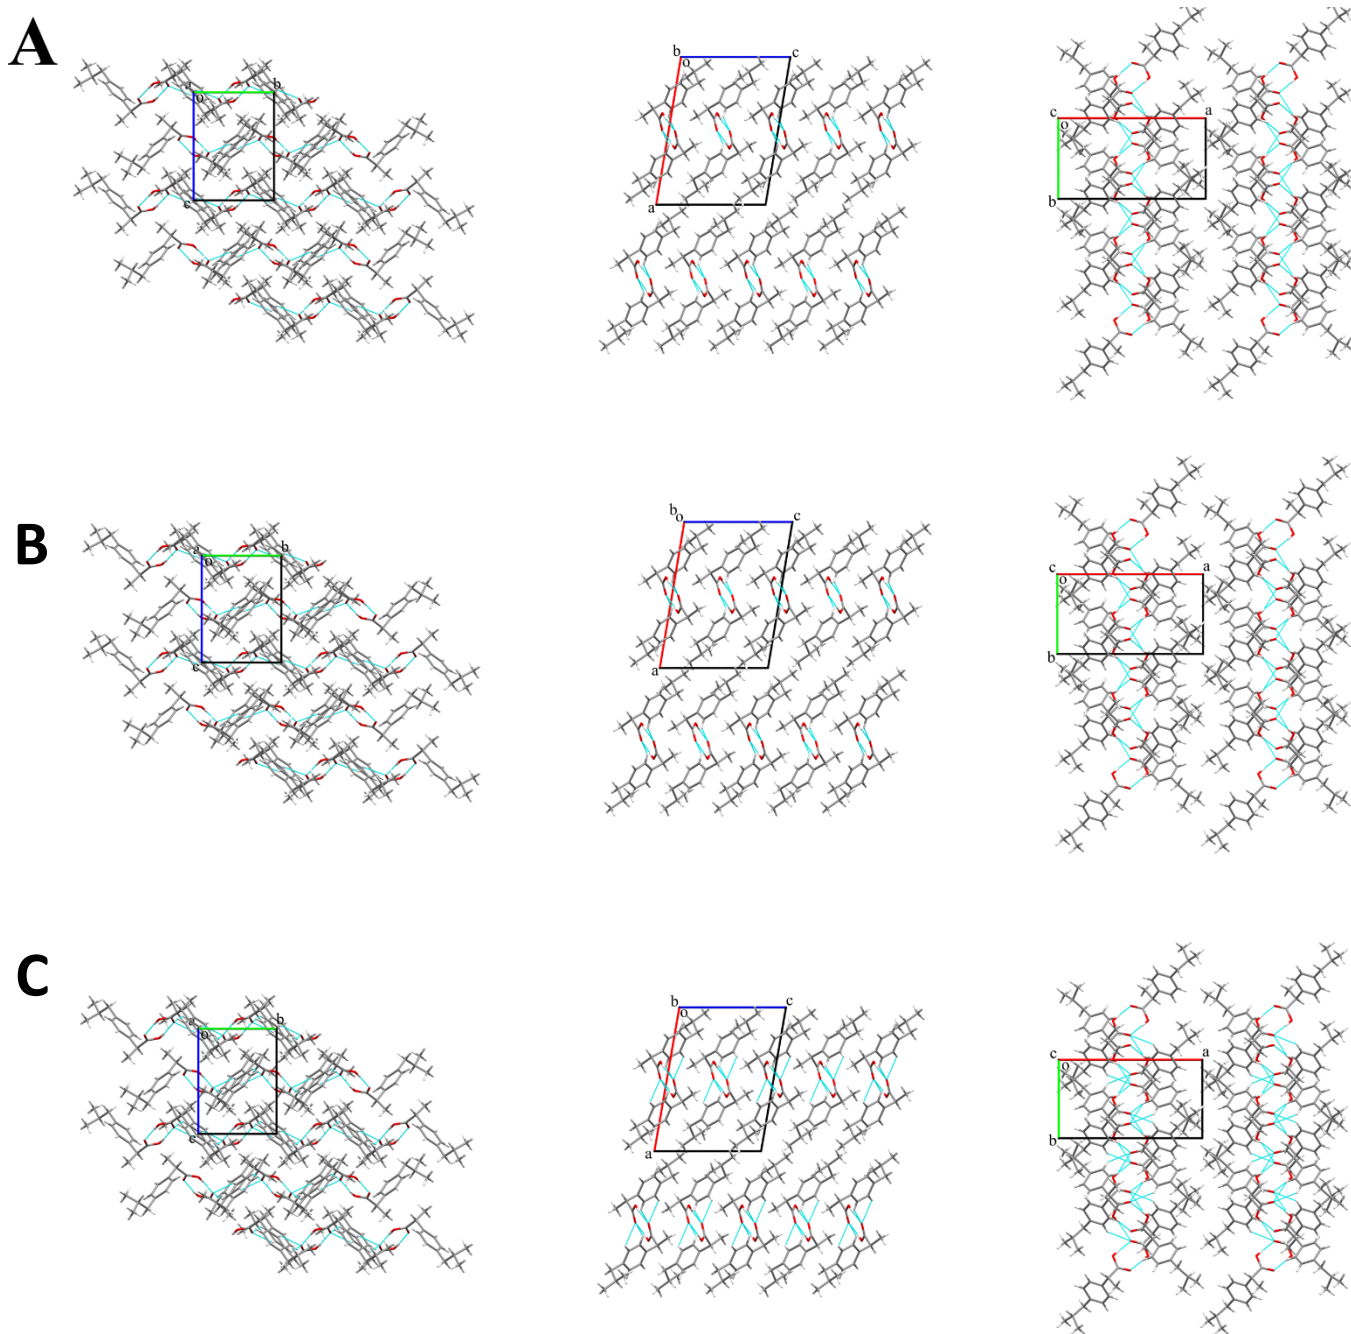

**Figure S1.** Packing of the molecules in the crystals of ibuprofen polymorphs **I** at **ambient pressure** and under the pressure of **0.23** and **0.60 GPa**. The projections in *a* (right), *b* (middle), *c* (left) crystallographic directions are represented

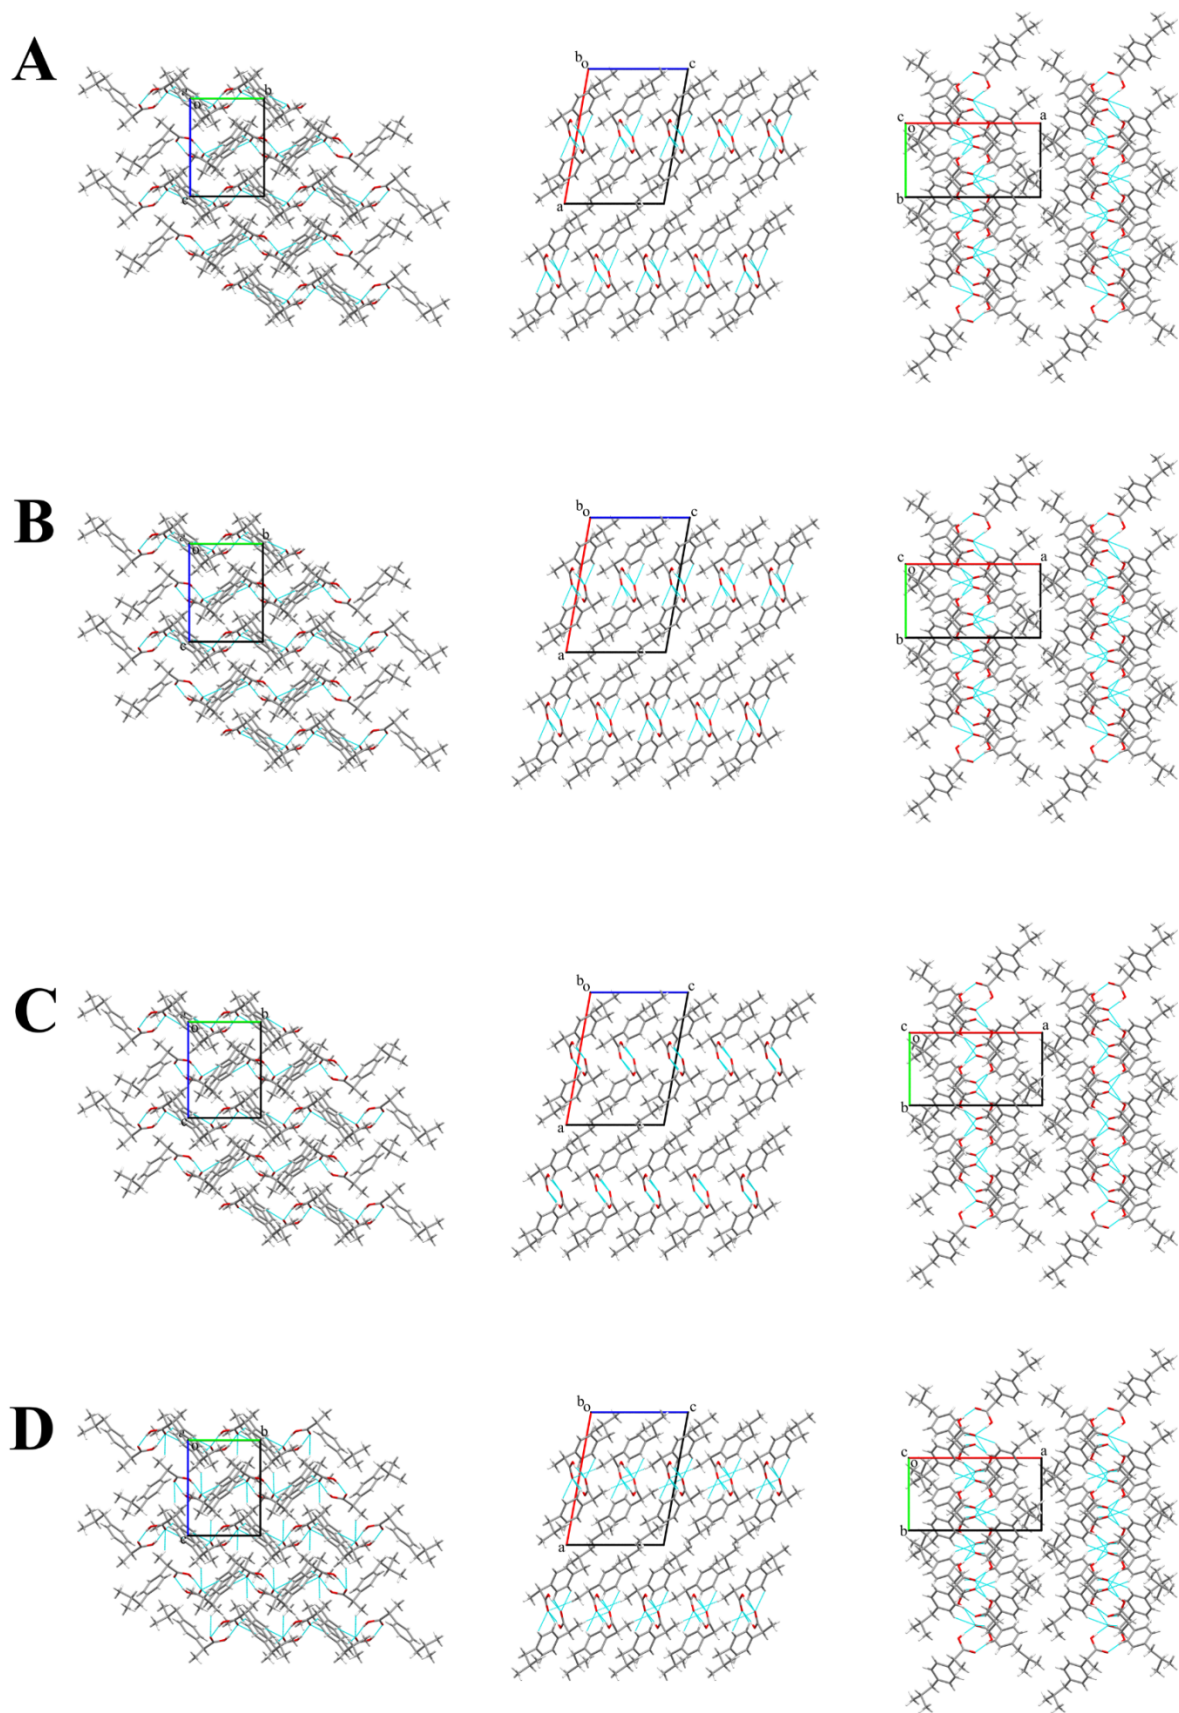

**Figure S2.** Packing of the molecules in the crystals of ibuprofen polymorph **I** under the pressure of **0.80 (A)**, **0.88 (B)**, **1.70 (C)** and **1.89 GPa (D)**. The projections in *a* (right), *b* (middle), *c* (left) crystallographic directions are represented.



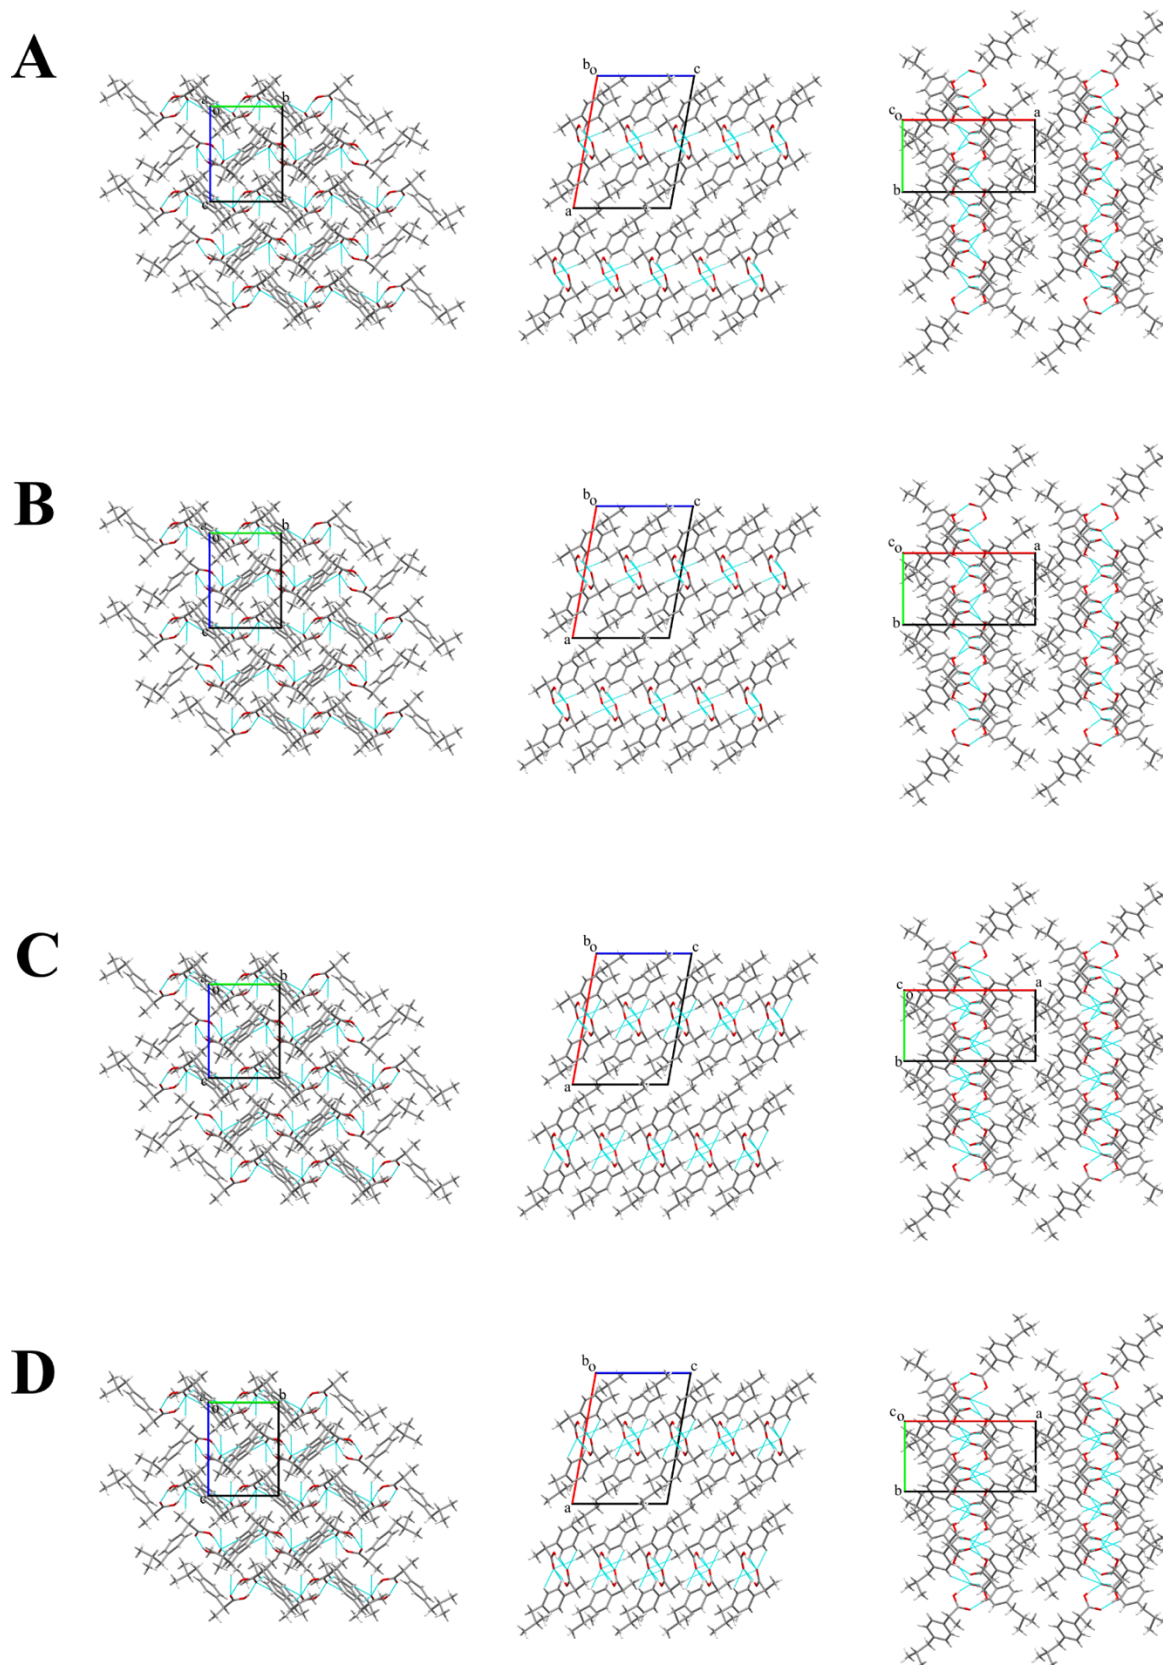

**Figure S3.** Packing of the molecules in the crystals of ibuprofen polymorph **I** under the pressure of 2.32 (A), 2.65 (B), 3.46 (C) and 4.00 GPa (D). The projections in *a* (right), *b* (middle), *c* (left) crystallographic directions are represented.



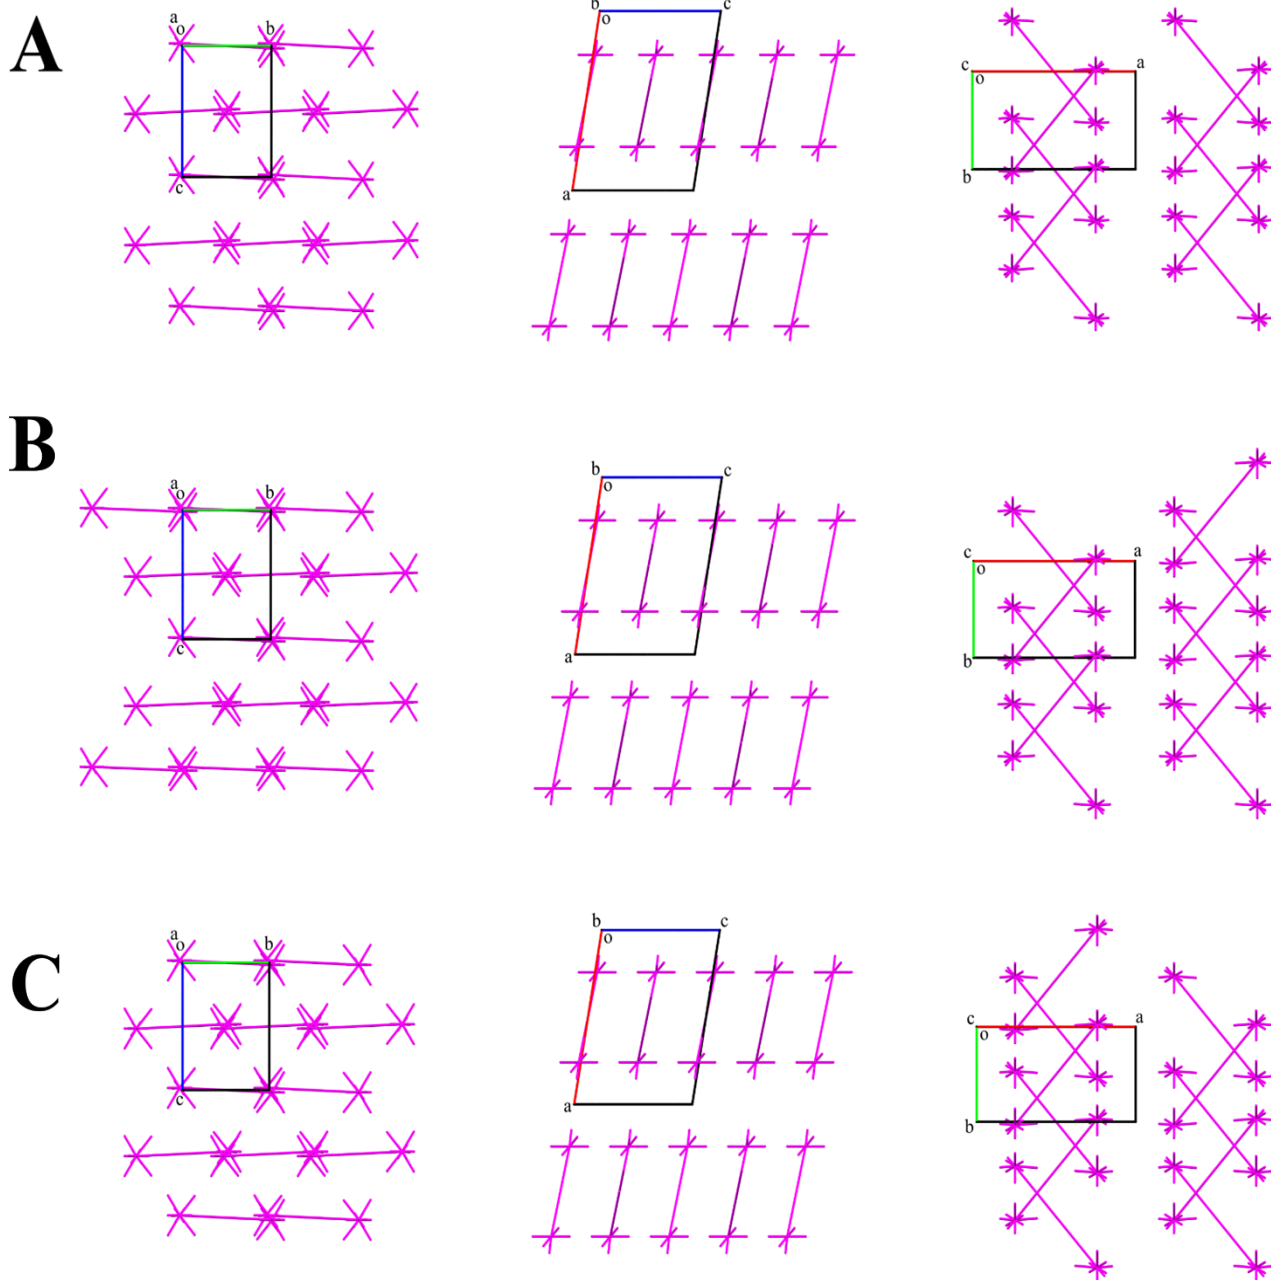

**Figure S4.** Packing of the energy vector diagrams representing the pairwise interaction energy distribution of **monomeric** building units in the crystals of ibuprofen polymorphs **I** **(A)** at **ambient pressure** and under the pressure of **0.23 (B)** and **0.60 GPa (C)**. The projections in *a* (right), *b* (middle), *c* (left) crystallographic directions are represented.

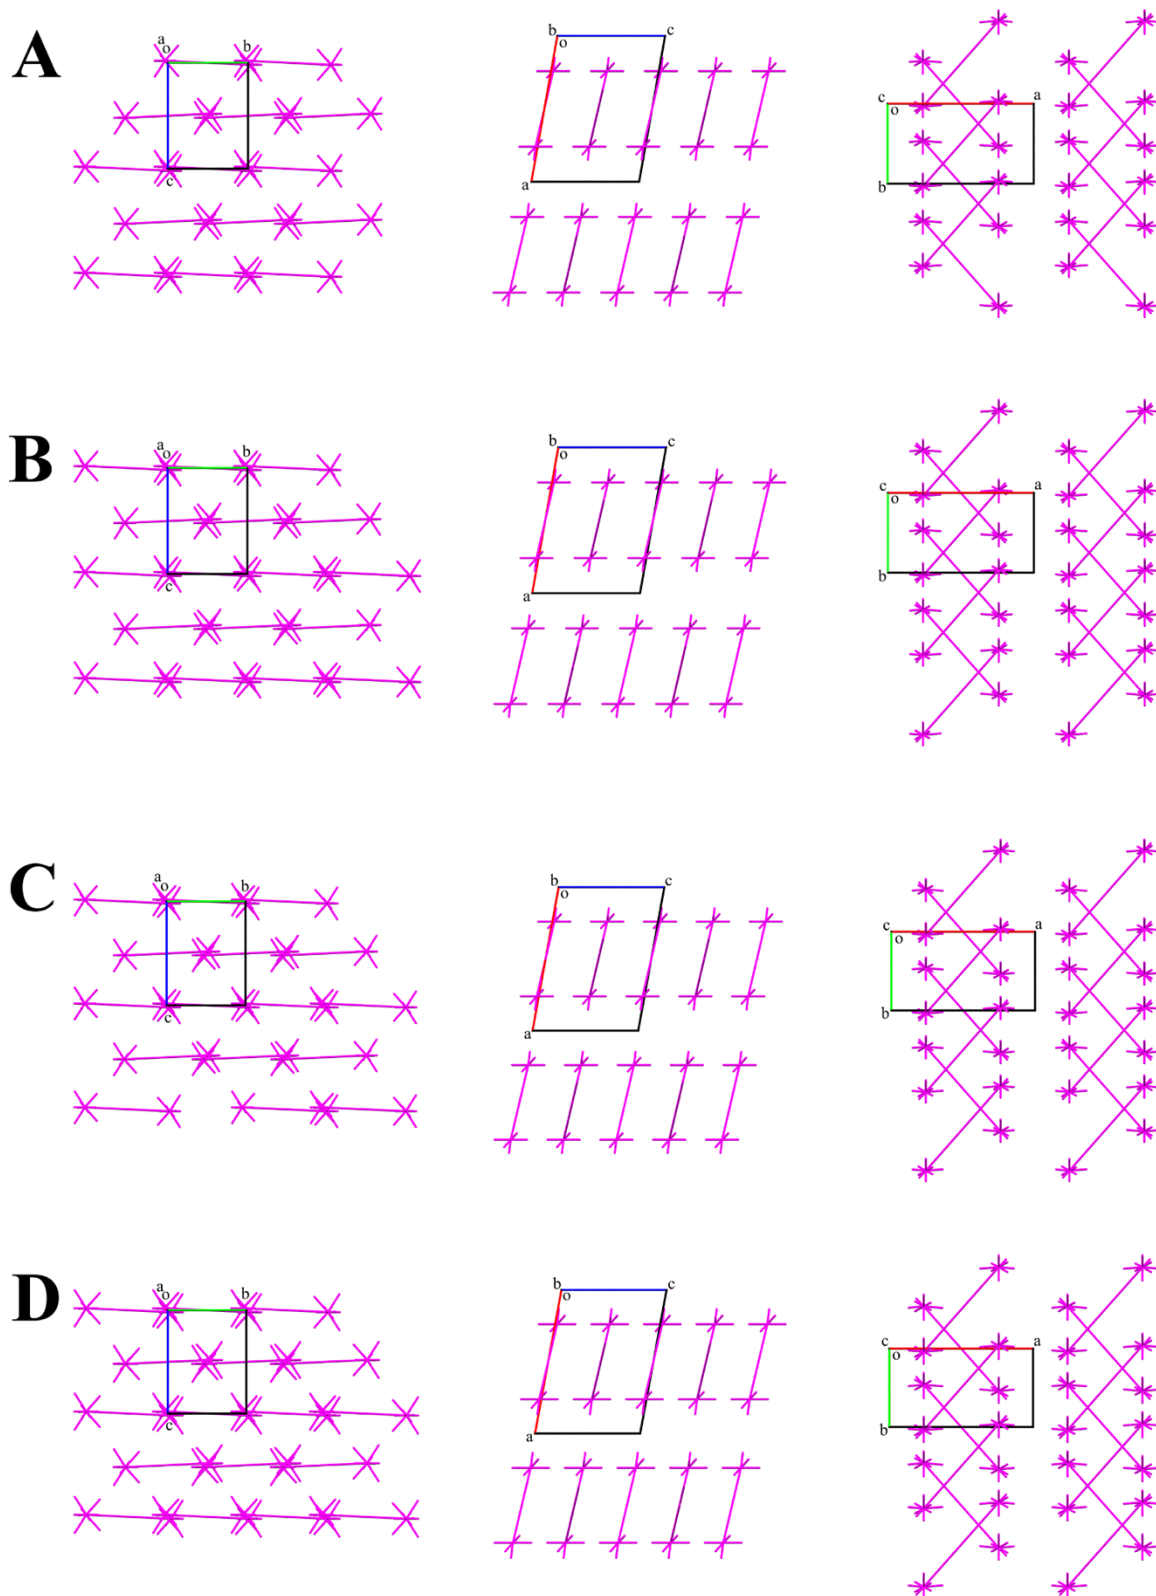

**Figure S5.** Packing of the energy vector diagrams representing the pairwise interaction energy distribution of **monomeric** building units in the crystals of ibuprofen polymorph **I** under the pressure of **0.80 (A)**, **0.88 (B)**, **1.70 (C)** and **1.89 GPa (D)**. The projections in *a* (right), *b* (middle), *c* (left) crystallographic directions are represented.

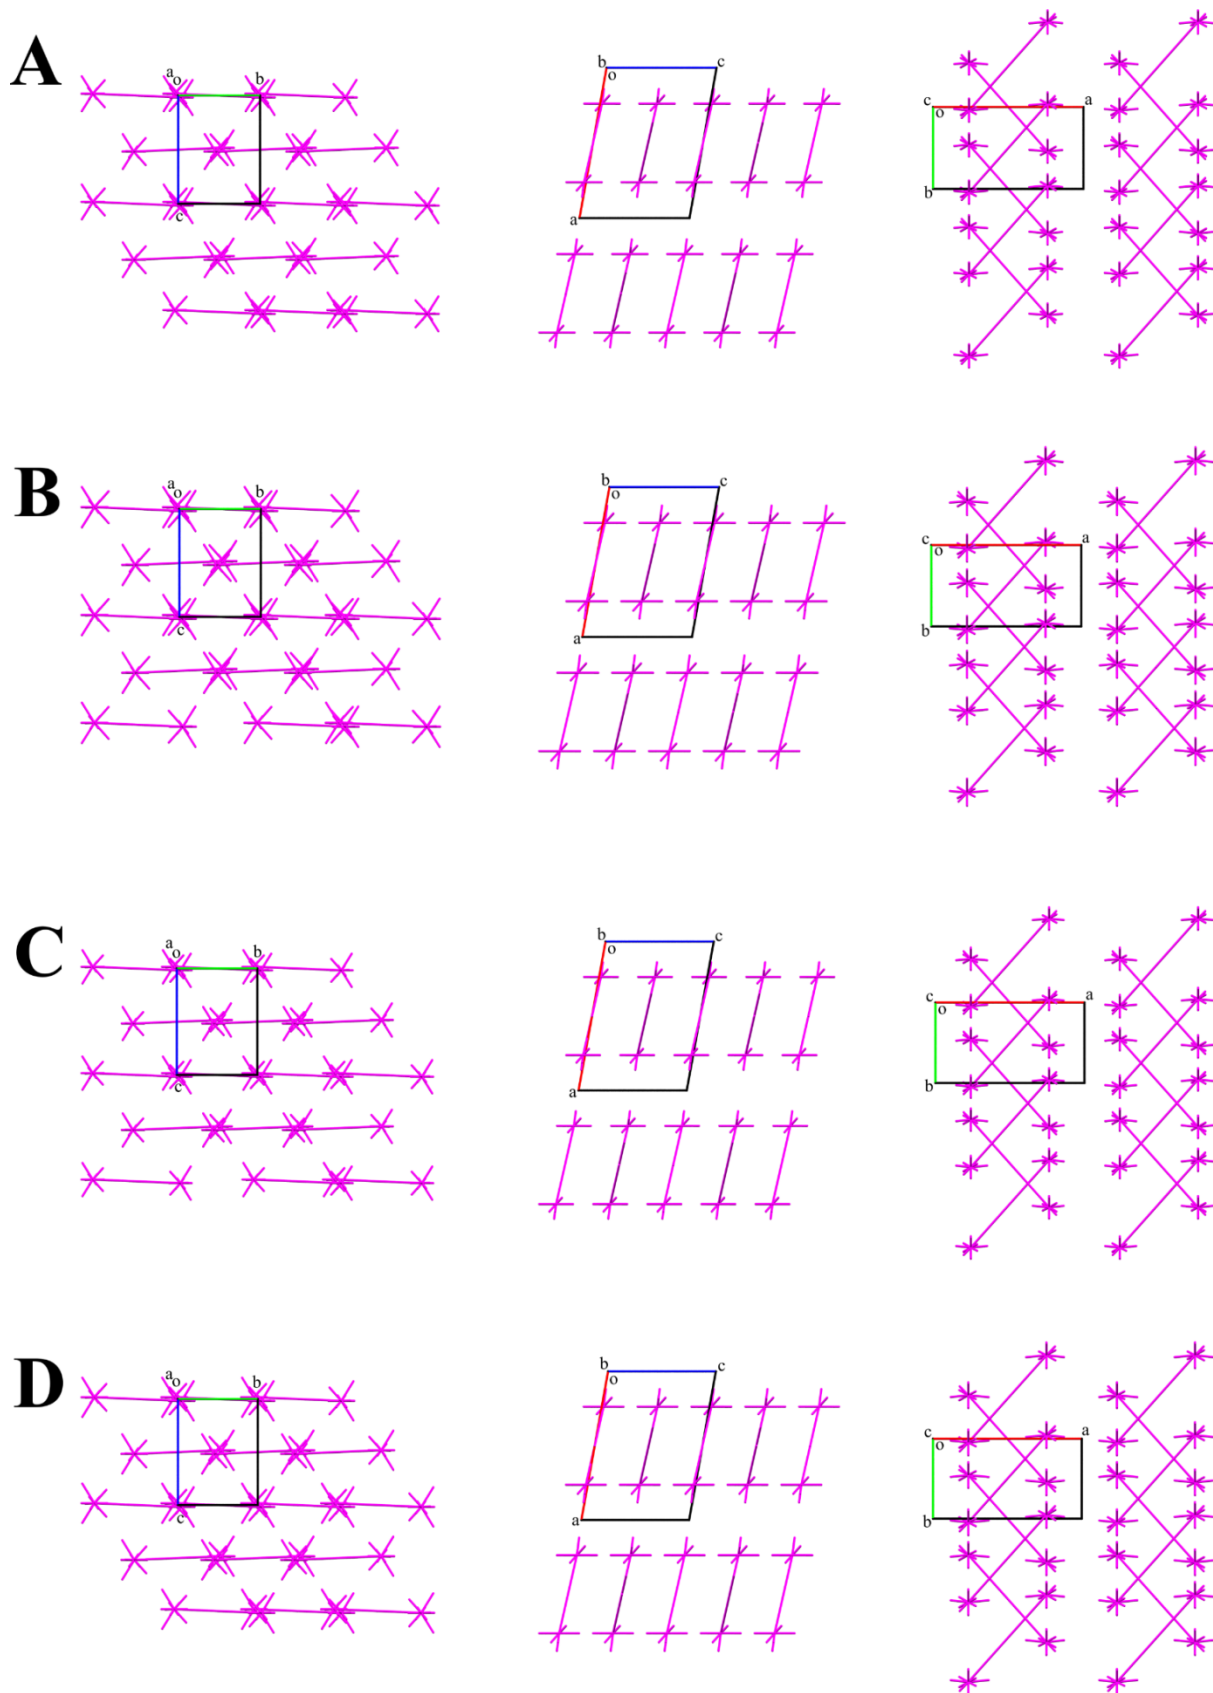

**Figure S6.** Packing of the energy vector diagrams representing the pairwise interaction energy distribution of **monomeric** building units in the crystals of ibuprofen polymorph **I** under the pressure of **2.32 (A)**, **2.65 (B)**, **3.46 (C)** and **4.00 GPa (D)**. The projections in  $a$  (right),  $b$  (middle),  $c$  (left) crystallographic directions are represented.

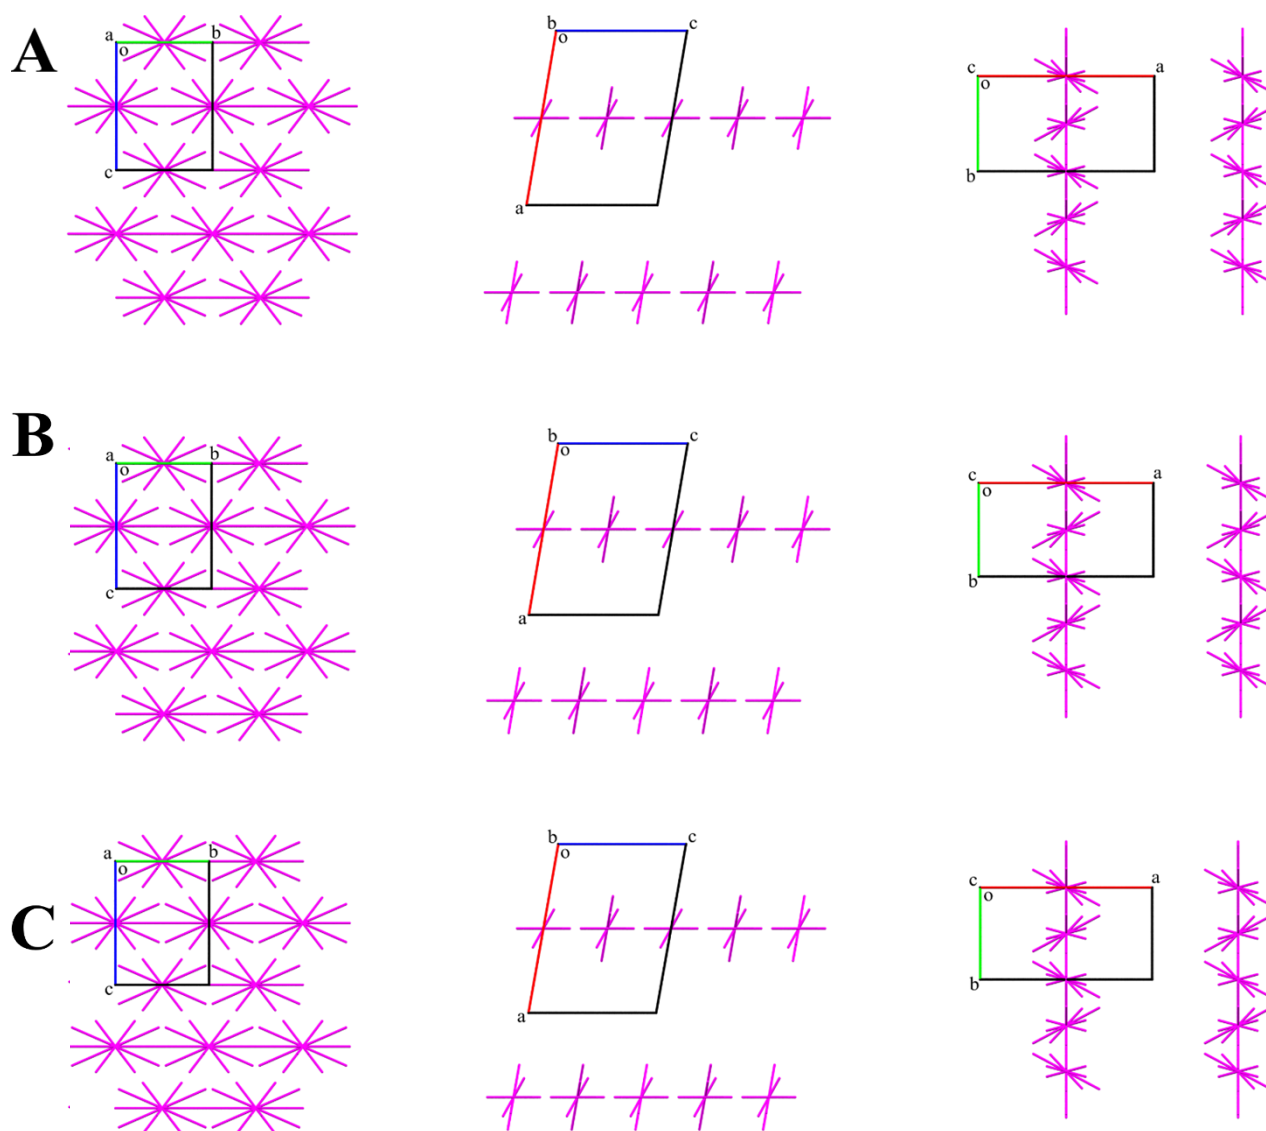

**Figure S7.** Packing of the energy vector diagrams representing the pairwise interaction energy distribution of **dimeric** building units in the crystals of ibuprofen polymorphs **I (A) at ambient pressure** and under the pressure of **0.23 (B)** and **0.60 GPa (C)**. The projections in *a* (right), *b* (middle), *c* (left) crystallographic directions are represented.

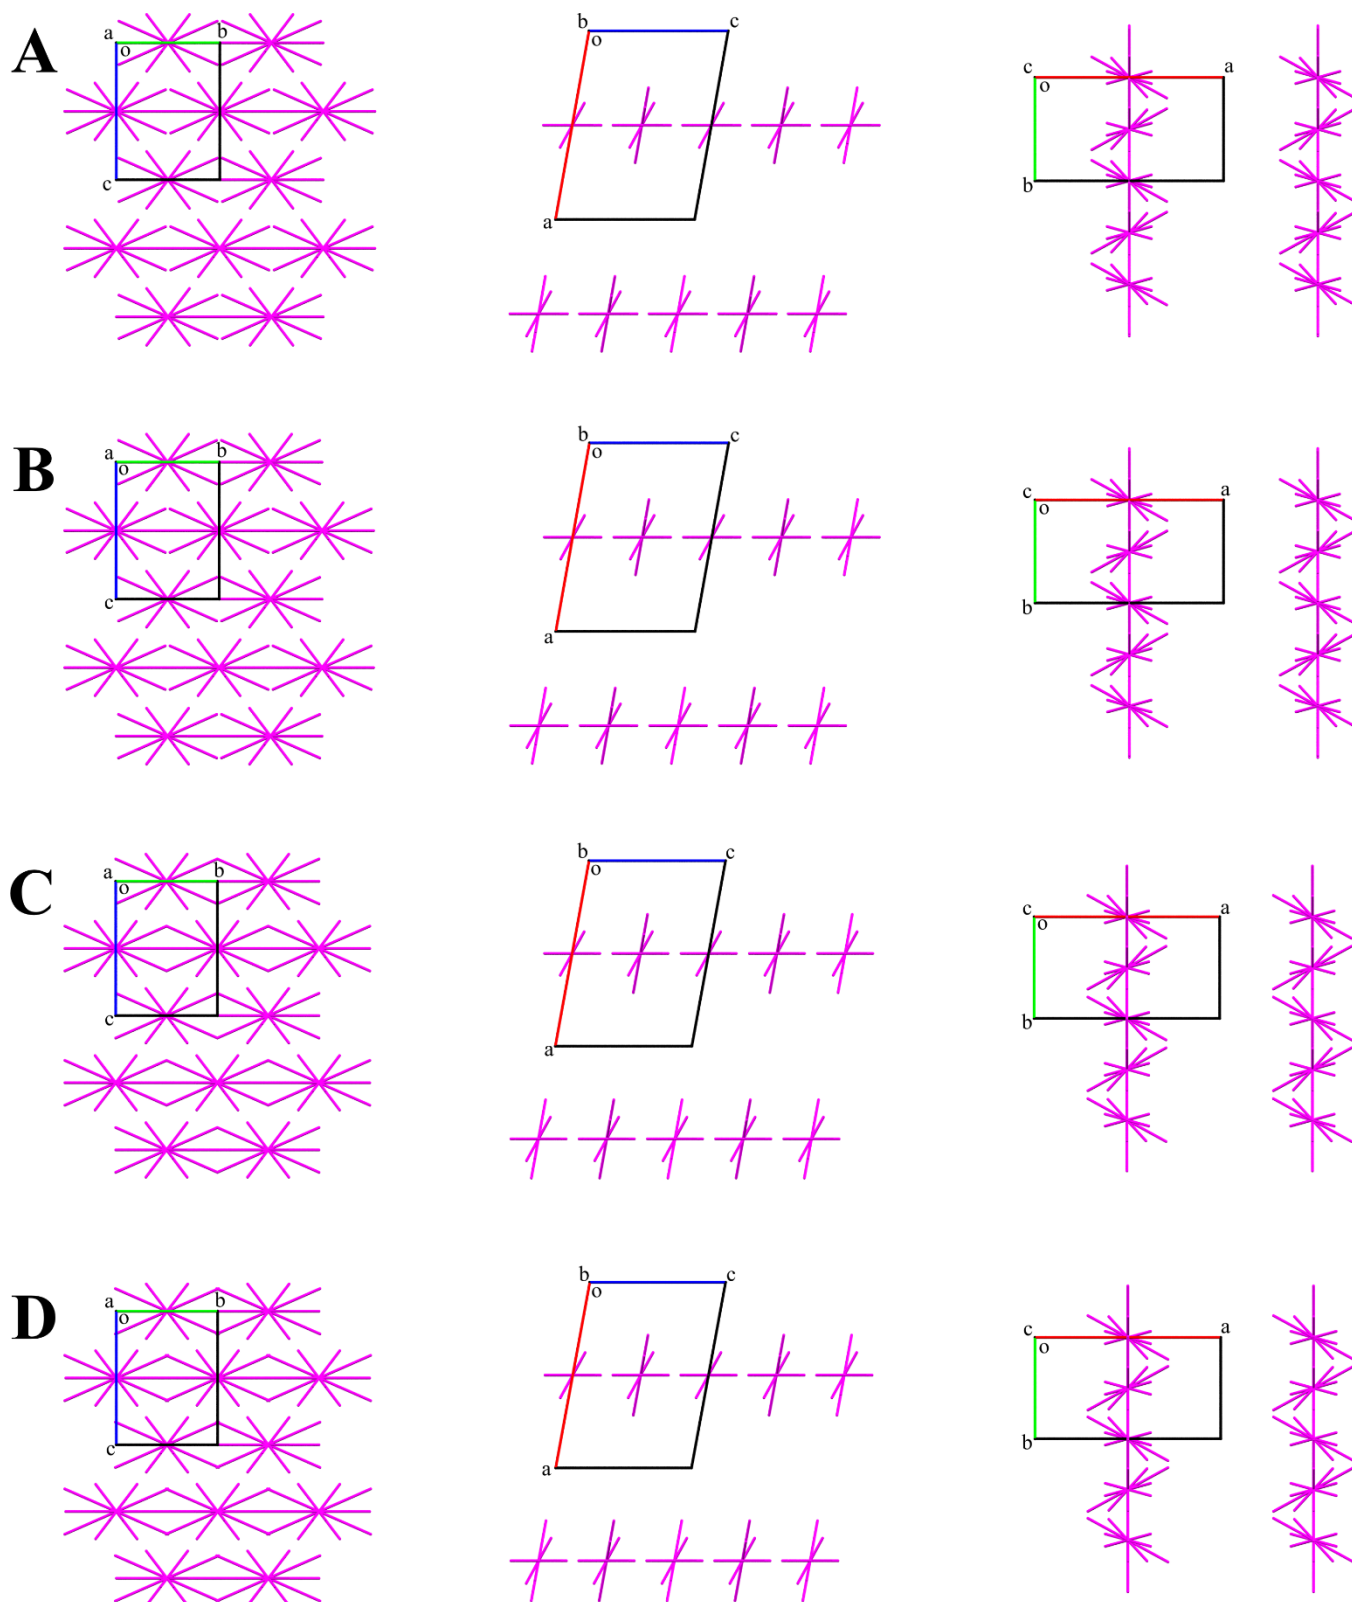

**Figure S8.** Packing of the energy vector diagrams representing the pairwise interaction energy distribution of **dimeric** building units in the crystals of ibuprofen polymorph **I** under the pressure of **0.80 (A)**, **0.88 (B)**, **1.70 (C)** and **1.89 GPa (D)**. The projections in *a* (right), *b* (middle), *c* (left) crystallographic directions are represented.

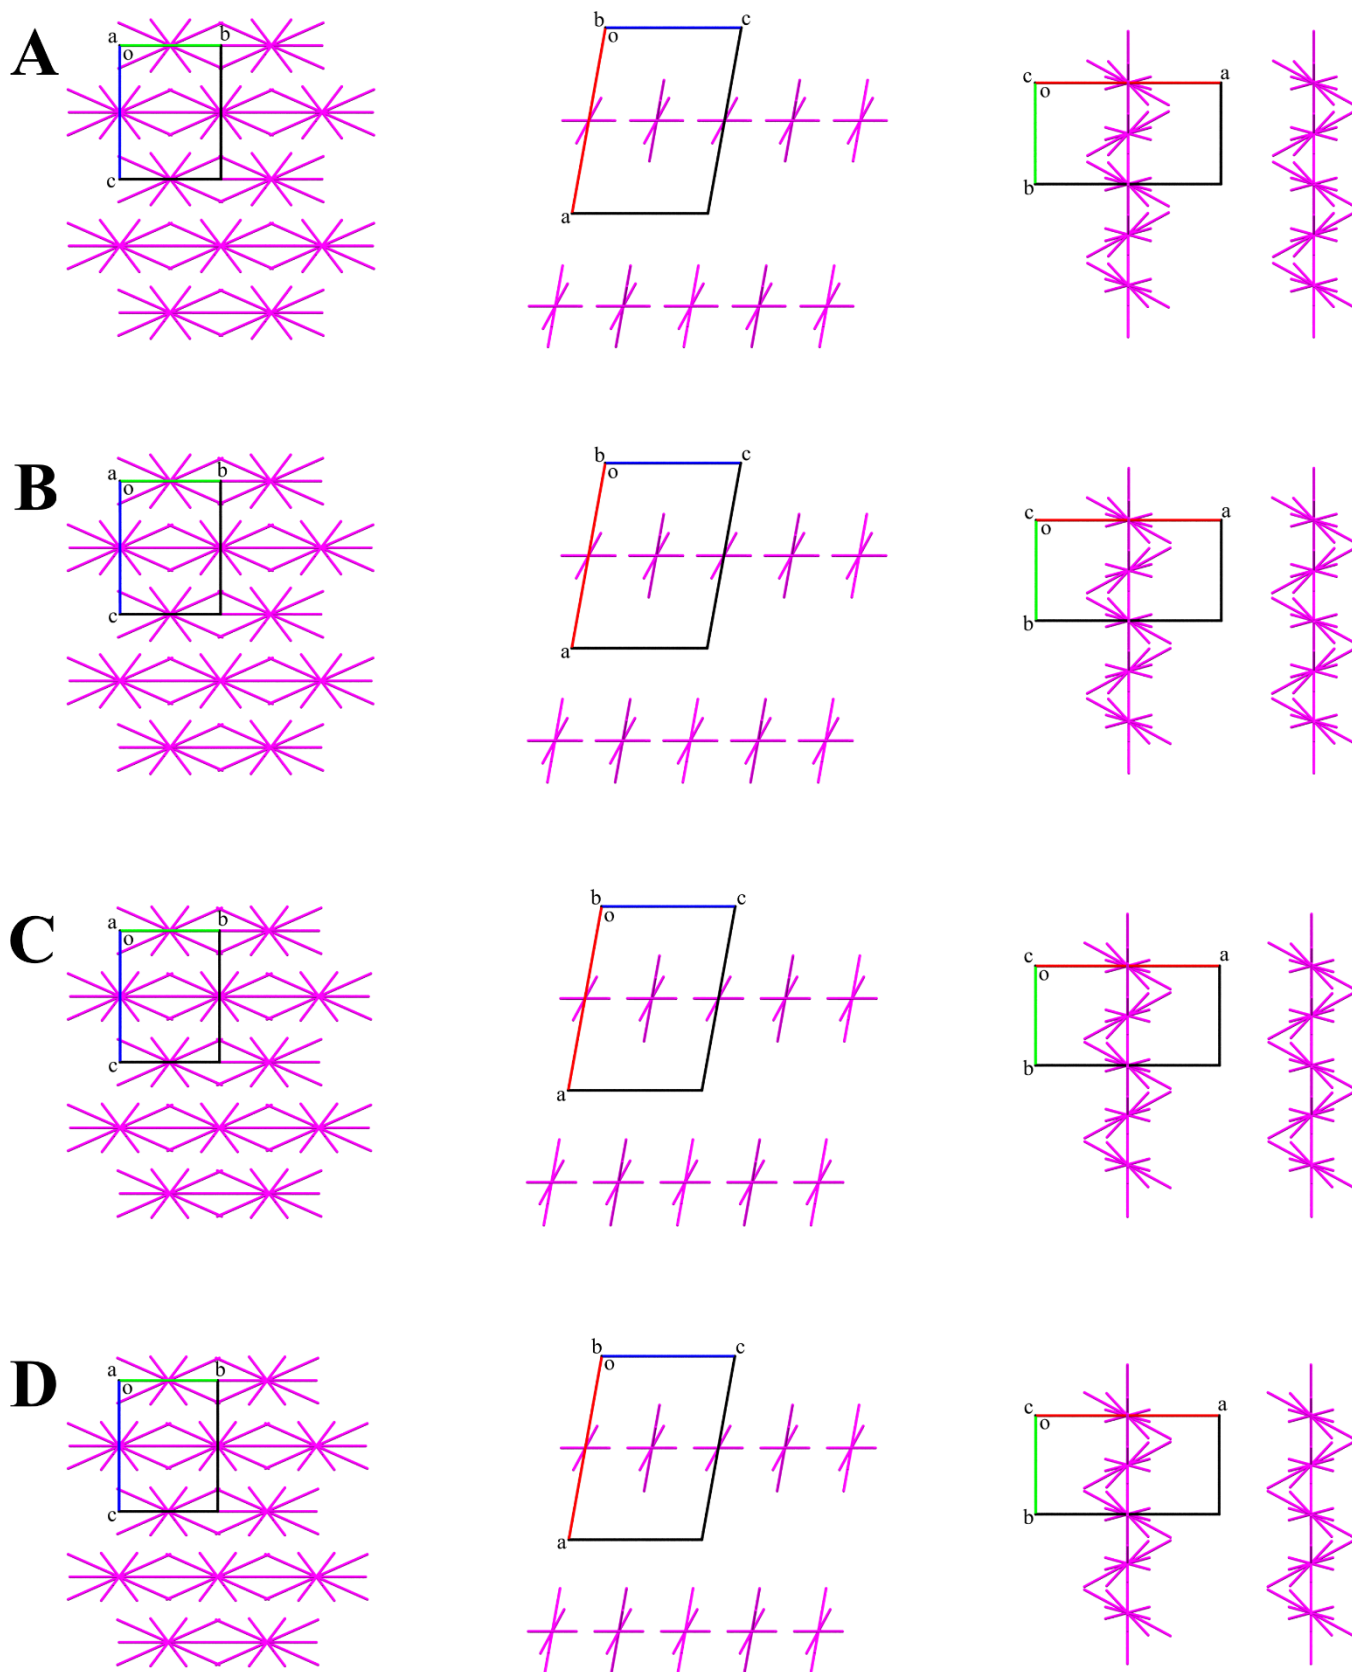

**Figure S9.** Packing of the energy vector diagrams representing the pairwise interaction energy distribution of **dimeric** building units in the crystals of ibuprofen polymorph **I** under the pressure of **2.32 (A)**, **2.65 (B)**, **3.46 (C)** and **4.00 GPa (D)**. The projections in *a* (right), *b* (middle), *c* (left) crystallographic directions are represented.



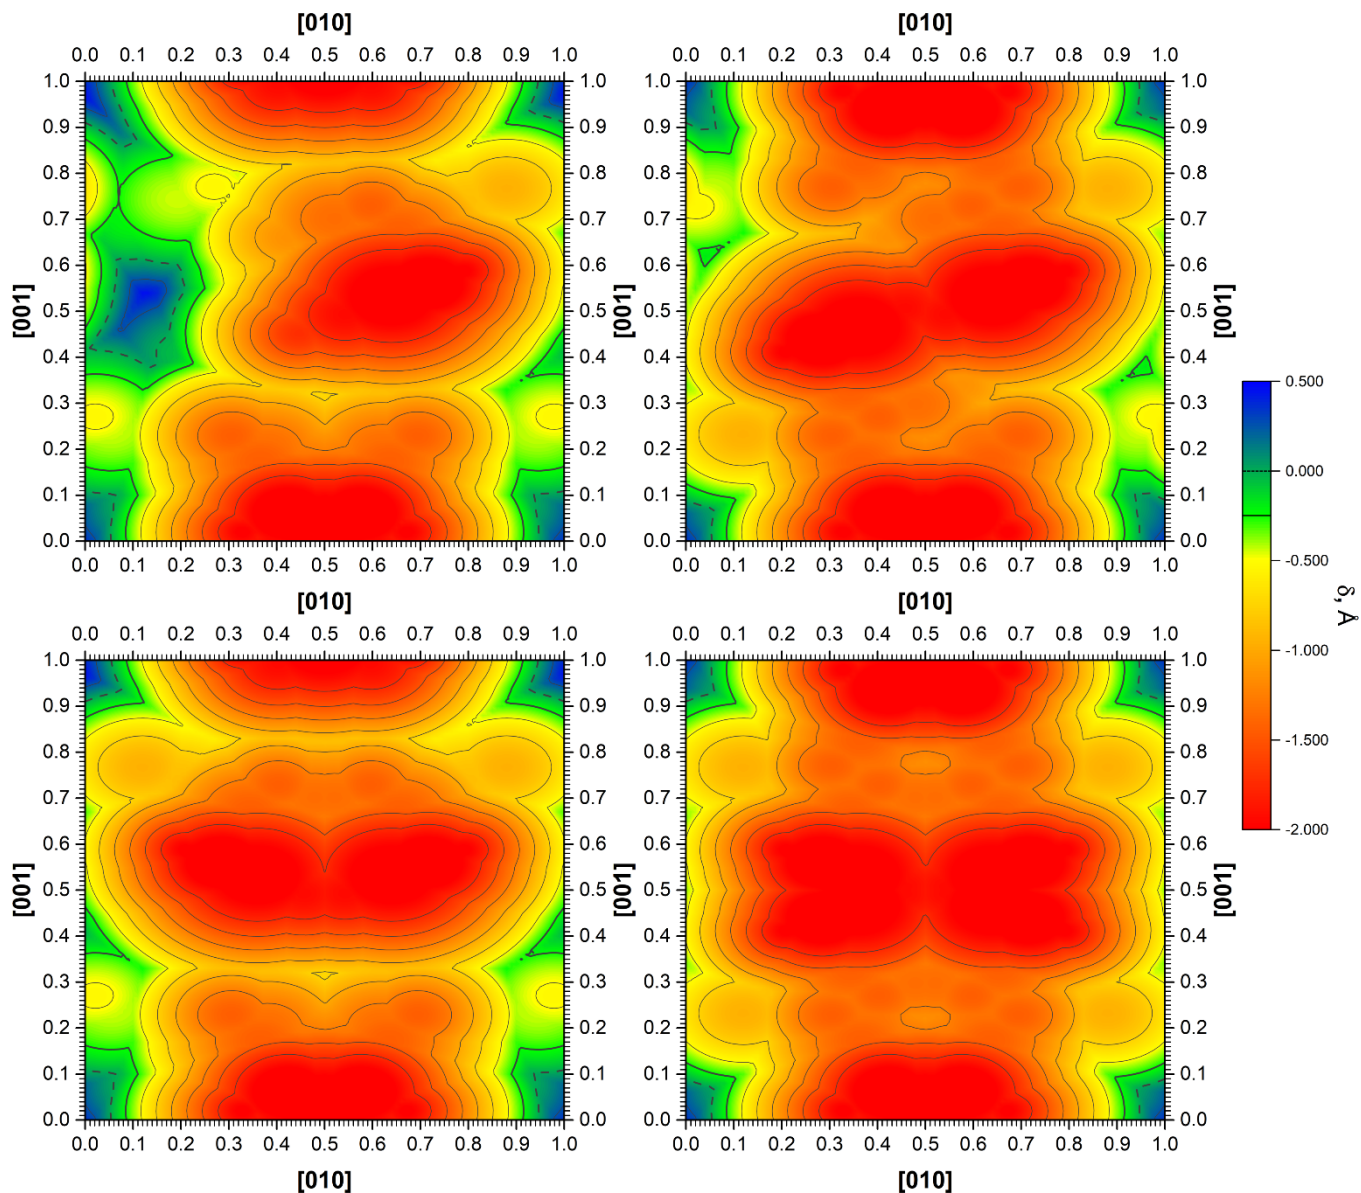

**Figure S10.** 2D-maps of the parameter  $\delta$  during the displacement of the mobile DBU to the fixed part within the (100) crystallographic layer calculated using four model systems extracted from the crystal structure of the ibuprofen polymorphic form I at **ambient pressure**.

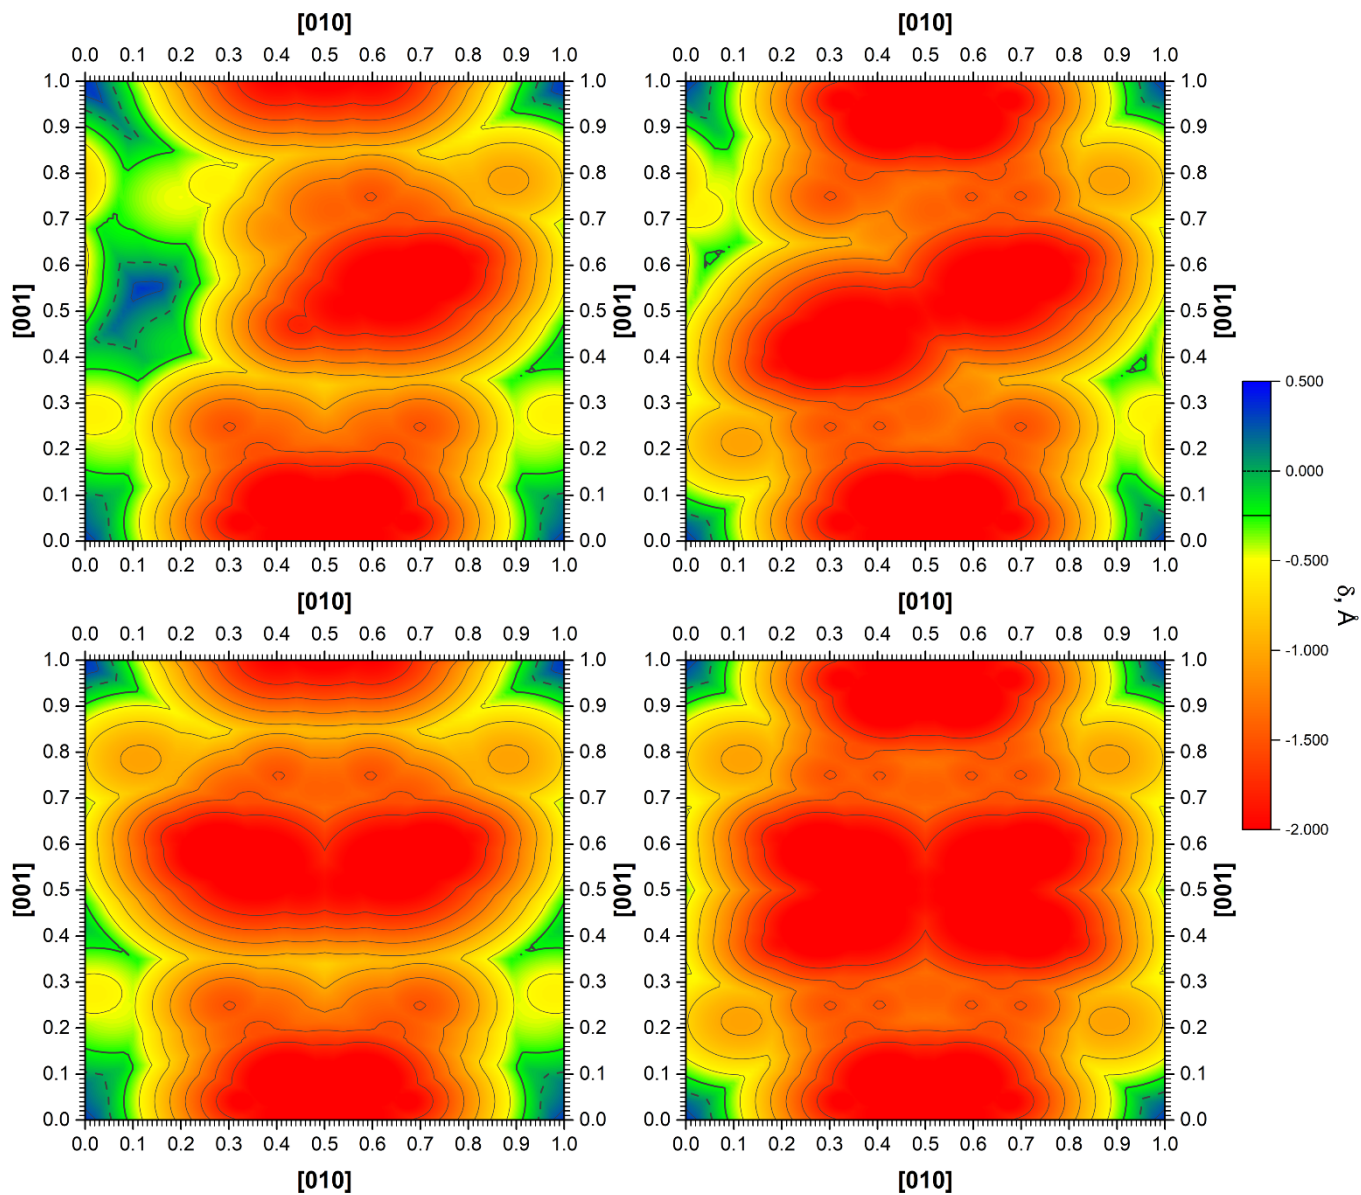

**Figure S11.** 2D-maps of the parameter  $\delta$  during the displacement of the mobile DBU to the fixed part within the (100) crystallographic layer calculated using four model systems extracted from the crystal structure of the ibuprofen polymorphic form **I** under the pressure of **0.23 GPa**.



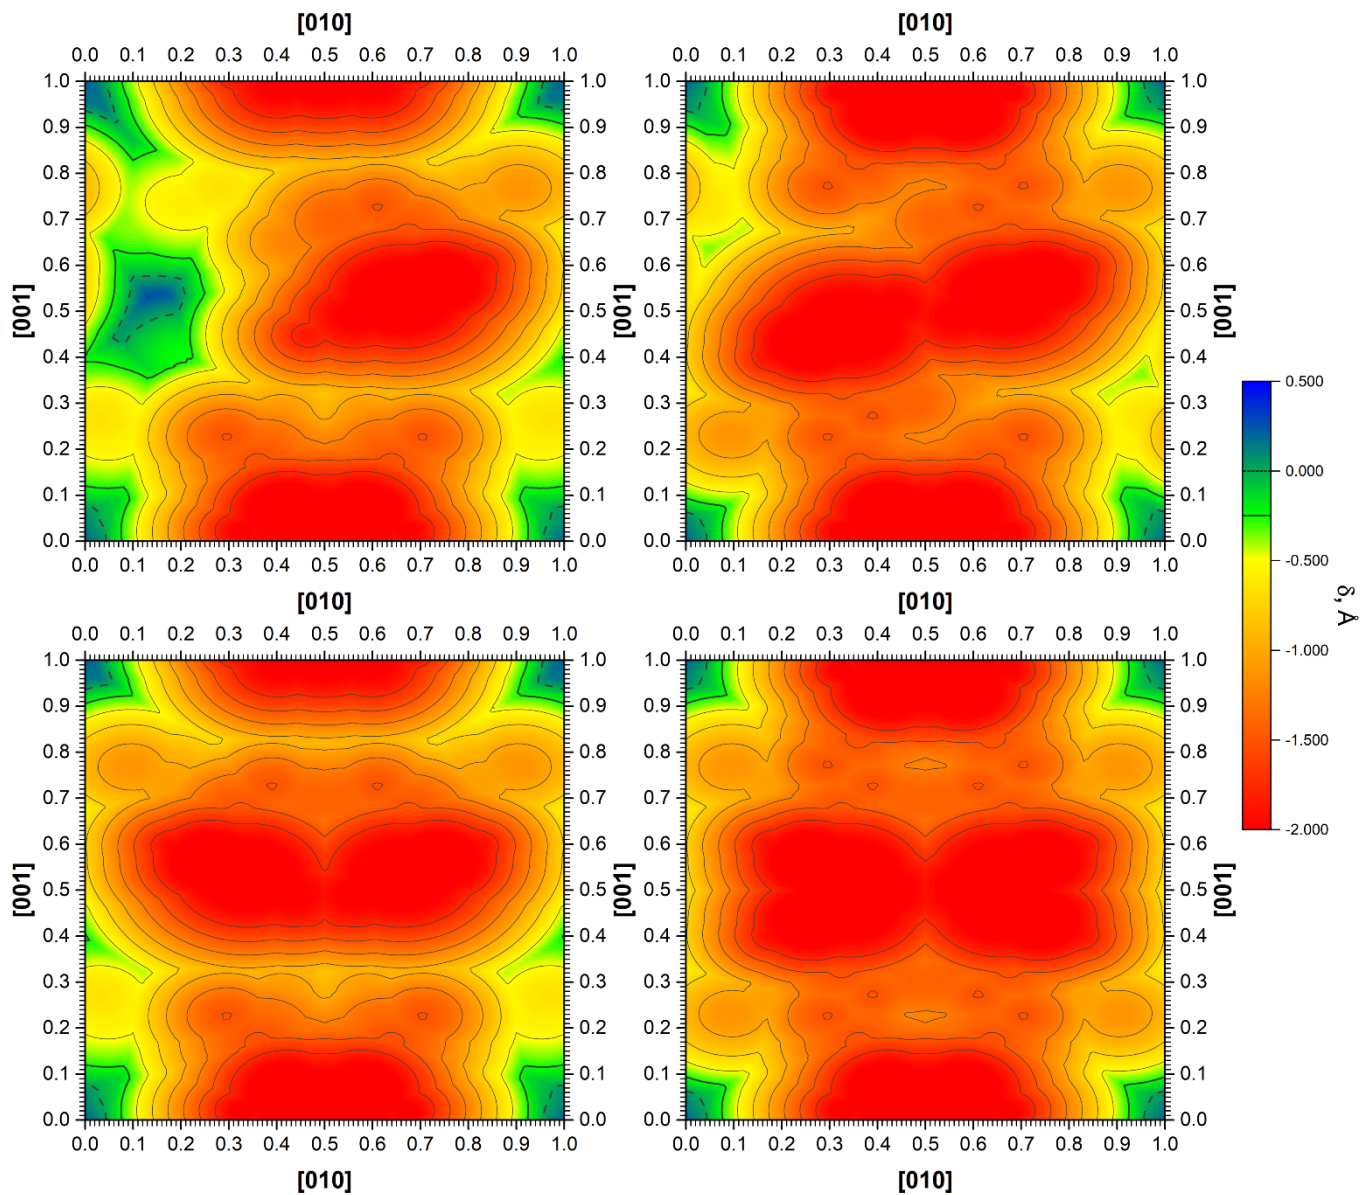

**Figure S12.** 2D-maps of the parameter  $\delta$  during the displacement of the mobile DBU to the fixed part within the (100) crystallographic layer calculated using four model systems extracted from the crystal structure of the ibuprofen polymorphic form **I** under the pressure of **0.60 GPa**.

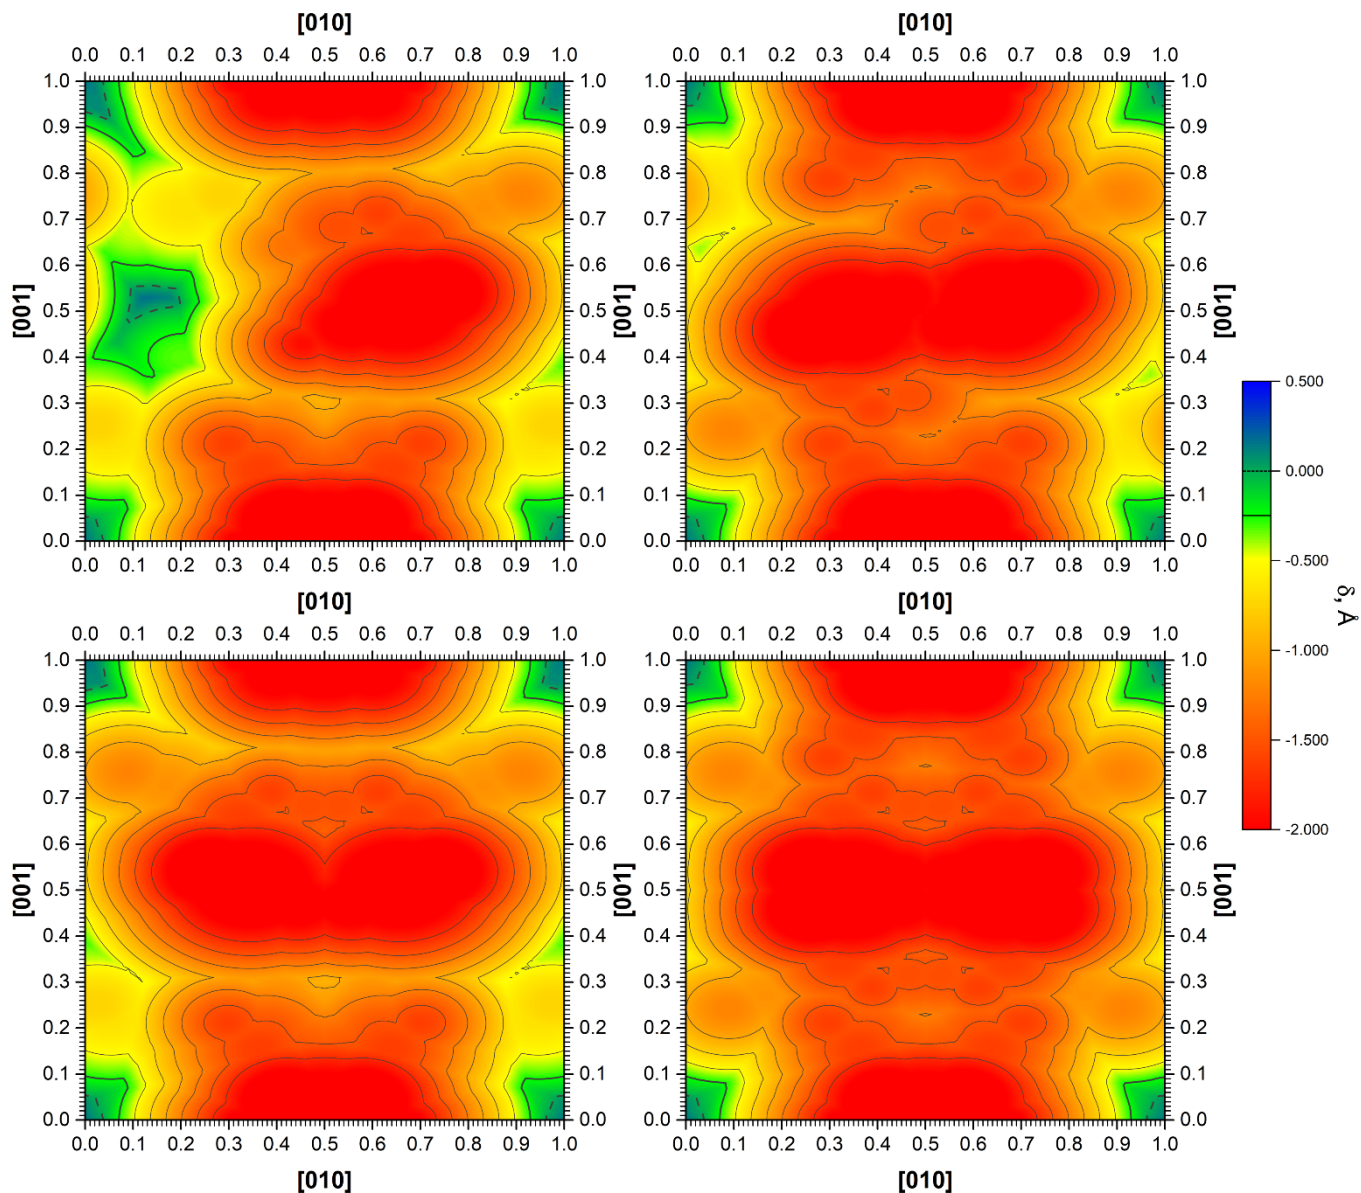

**Figure S13.** 2D-maps of the parameter  $\delta$  during the displacement of the mobile DBU to the fixed part within the (100) crystallographic layer calculated using four model systems extracted from the crystal structure of the ibuprofen polymorphic form **I** under the pressure of **0.80 GPa**.

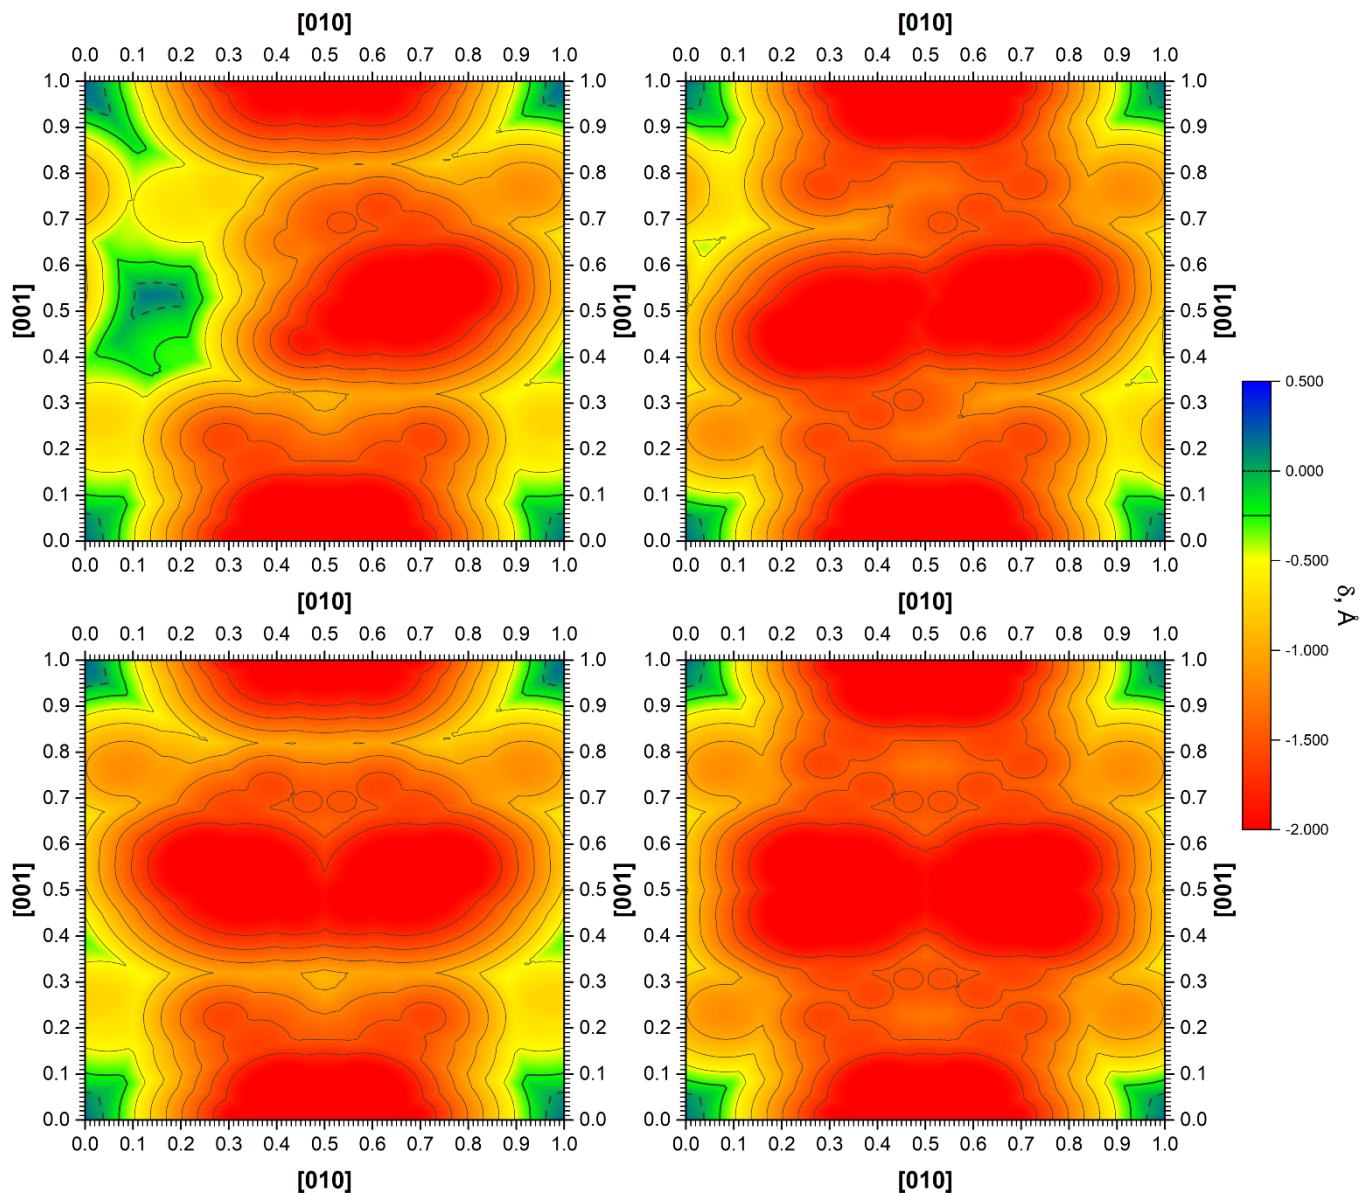

**Figure S14.** 2D-maps of the parameter  $\delta$  during the displacement of the mobile DBU to the fixed part within the (100) crystallographic layer calculated using four model systems extracted from the crystal structure of the ibuprofen polymorphic form **I** under the pressure of **0.88 GPa**.

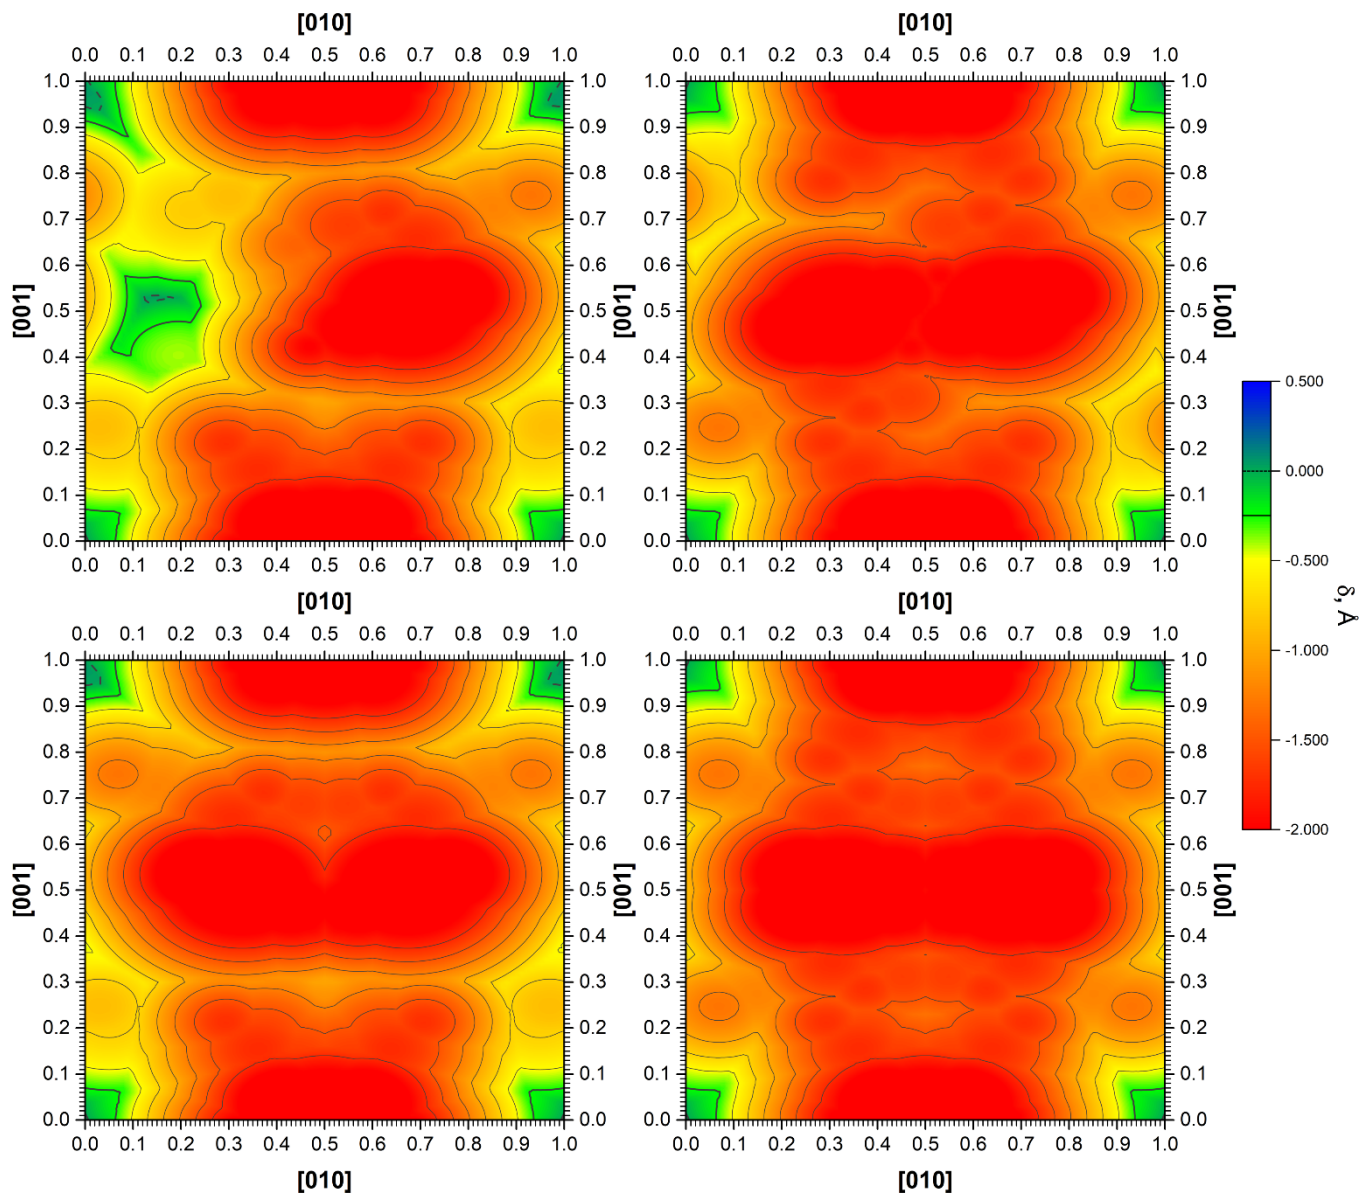

**Figure S15.** 2D-maps of the parameter  $\delta$  during the displacement of the mobile DBU to the fixed part within the (100) crystallographic layer calculated using four model systems extracted from the crystal structure of the ibuprofen polymorphic form **I** under the pressure of 1.70 GPa.



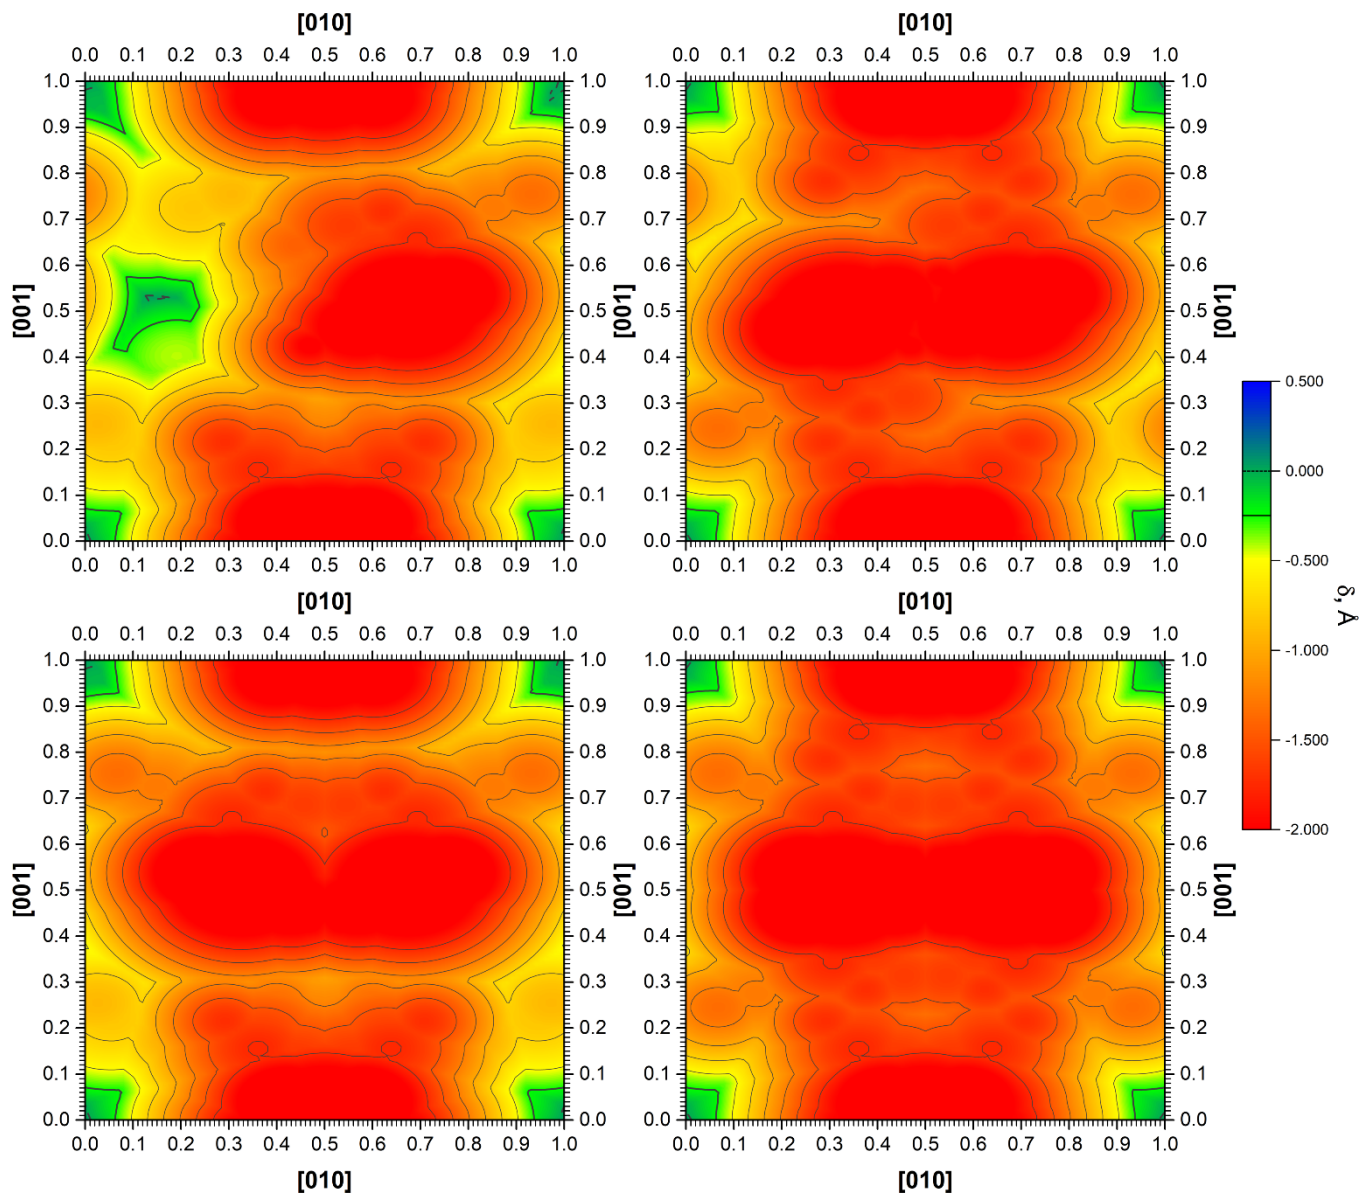

**Figure S16.** 2D-maps of the parameter  $\delta$  during the displacement of the mobile DBU to the fixed part within the (100) crystallographic layer calculated using four model systems extracted from the crystal structure of the ibuprofen polymorphic form **I** under the pressure of 1.89 GPa.

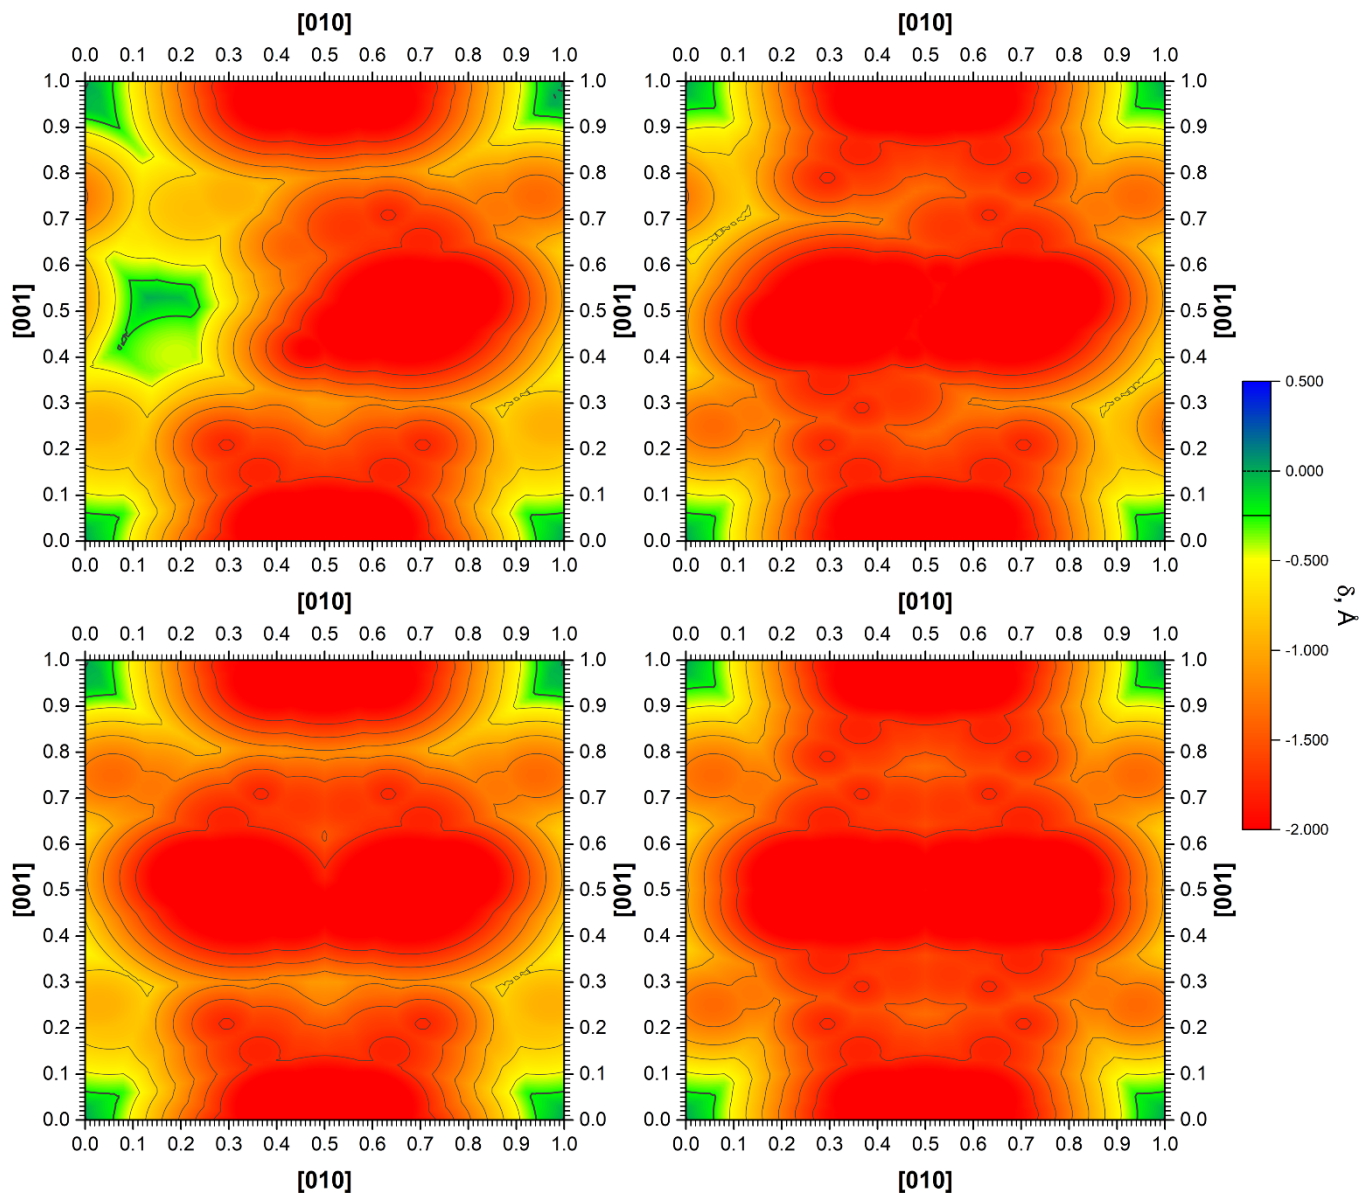

**Figure S17.** 2D-maps of the parameter  $\delta$  during the displacement of the mobile DBU to the fixed part within the (100) crystallographic layer calculated using four model systems extracted from the crystal structure of the ibuprofen polymorphic form **I** under the pressure of 2.32 GPa.

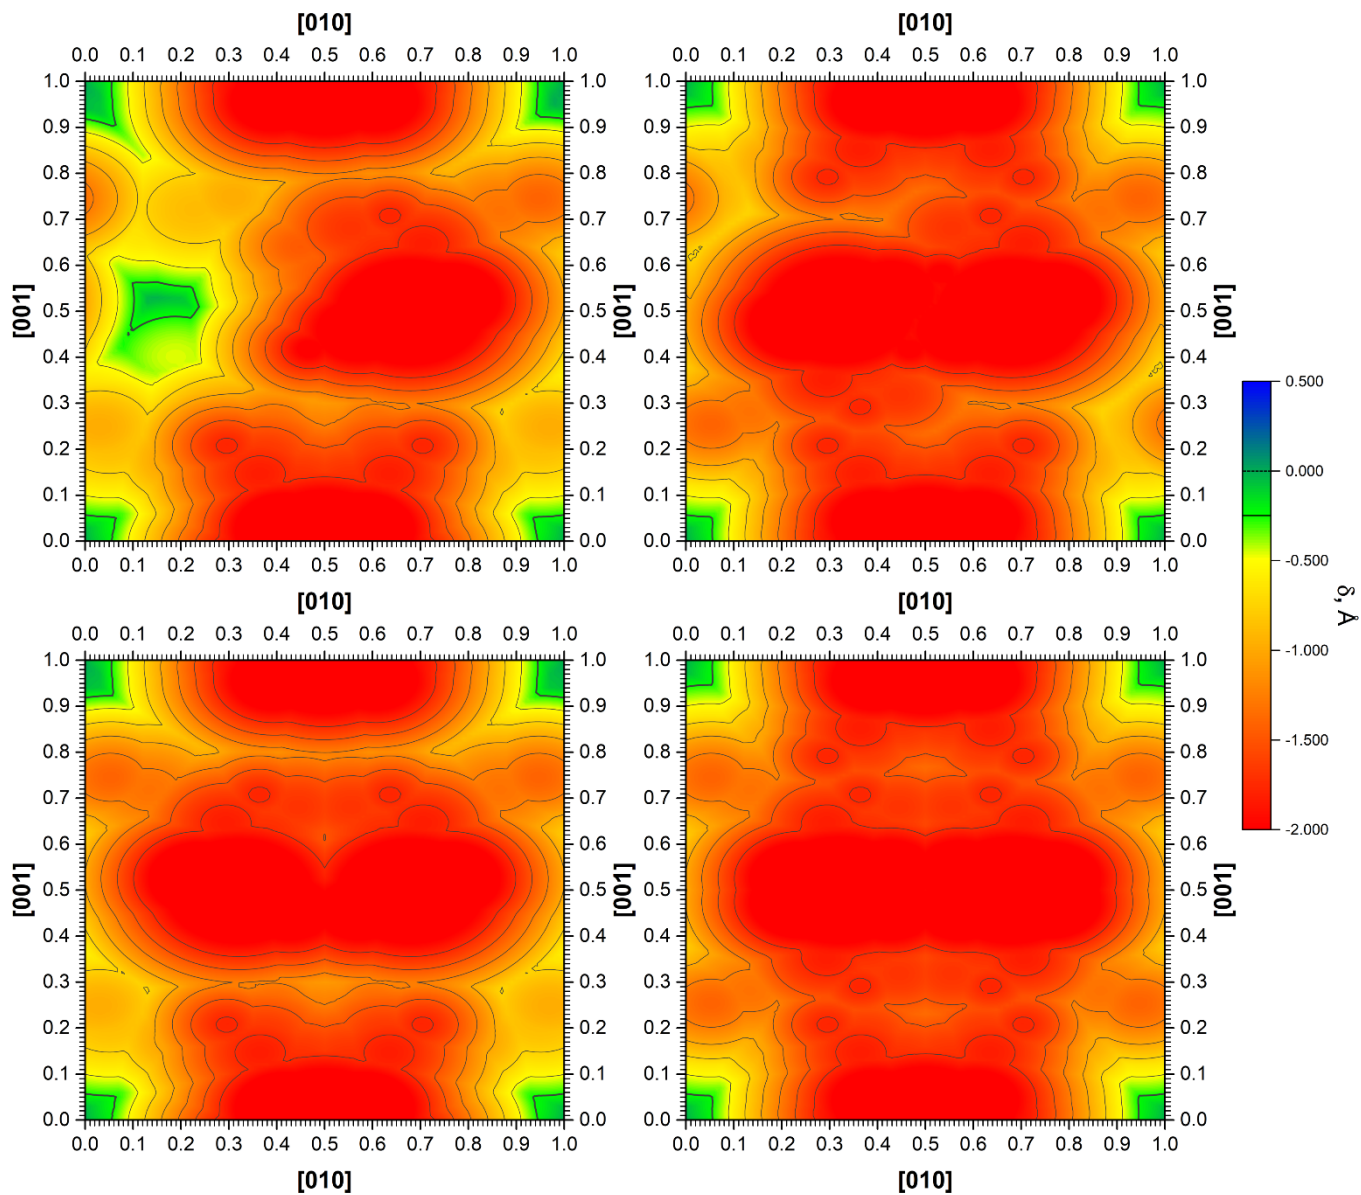

**Figure S18.** 2D-maps of the parameter  $\delta$  during the displacement of the mobile DBU to the fixed part within the (100) crystallographic layer calculated using four model systems extracted from the crystal structure of the ibuprofen polymorphic form **I** under the pressure of 2.65 GPa.

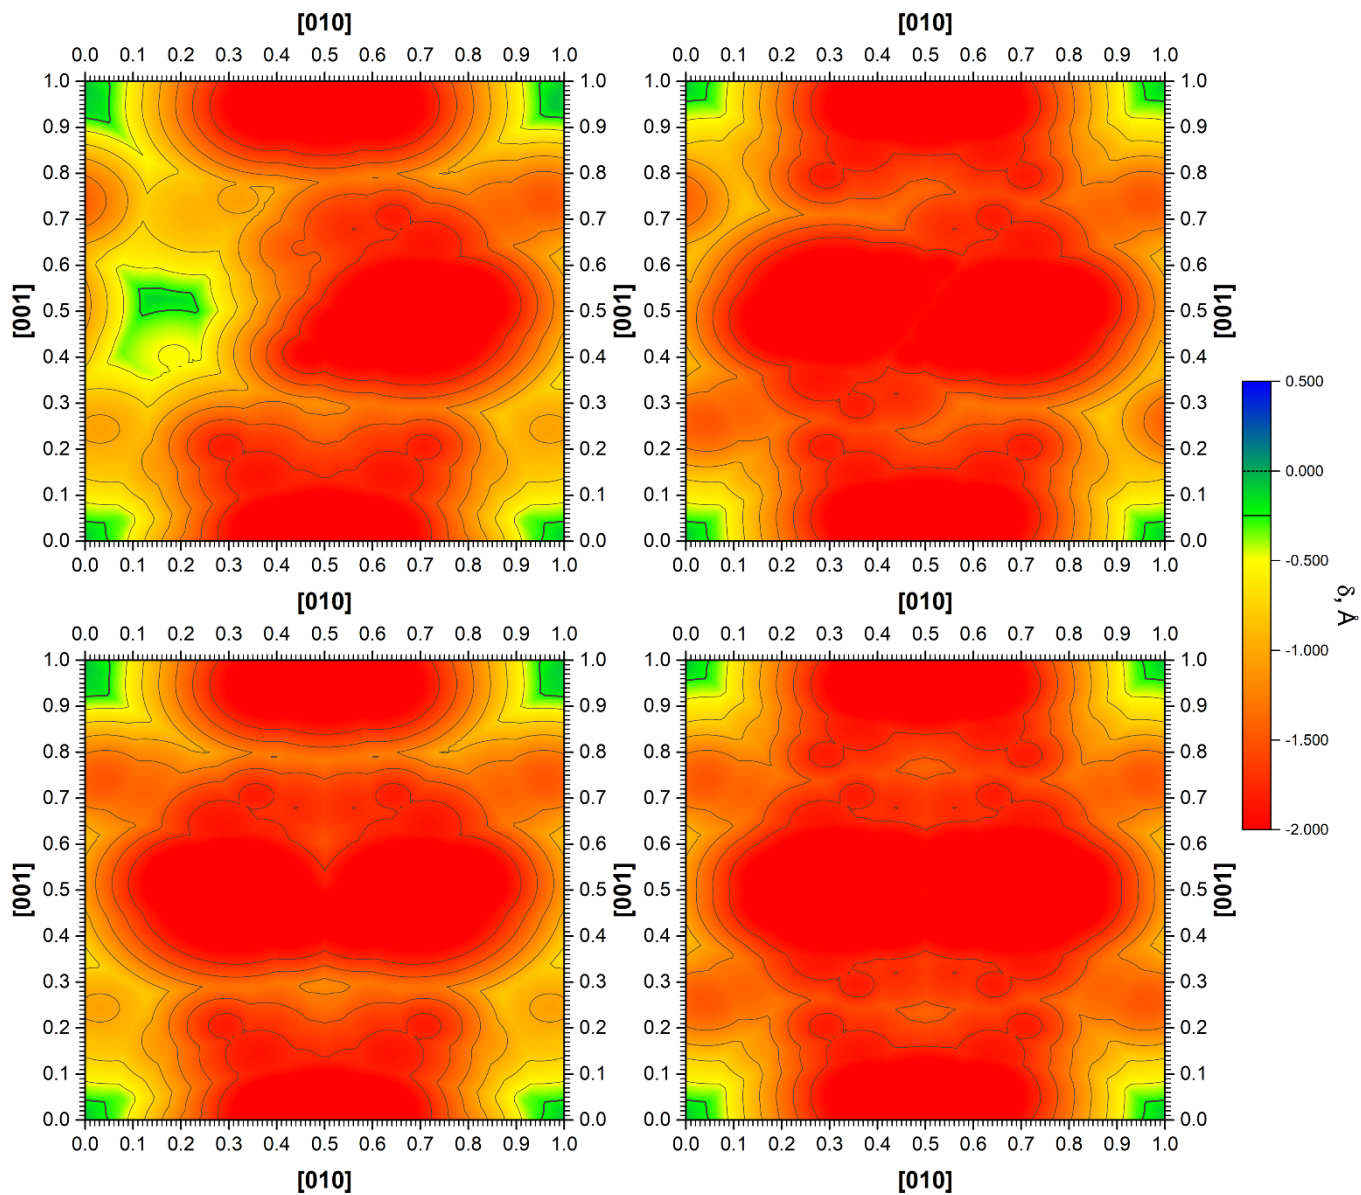

**Figure S19.** 2D-maps of the parameter  $\delta$  during the displacement of the mobile DBU to the fixed part within the (100) crystallographic layer calculated using four model systems extracted from the crystal structure of the ibuprofen polymorphic form **I** under the pressure of 3.46 GPa.



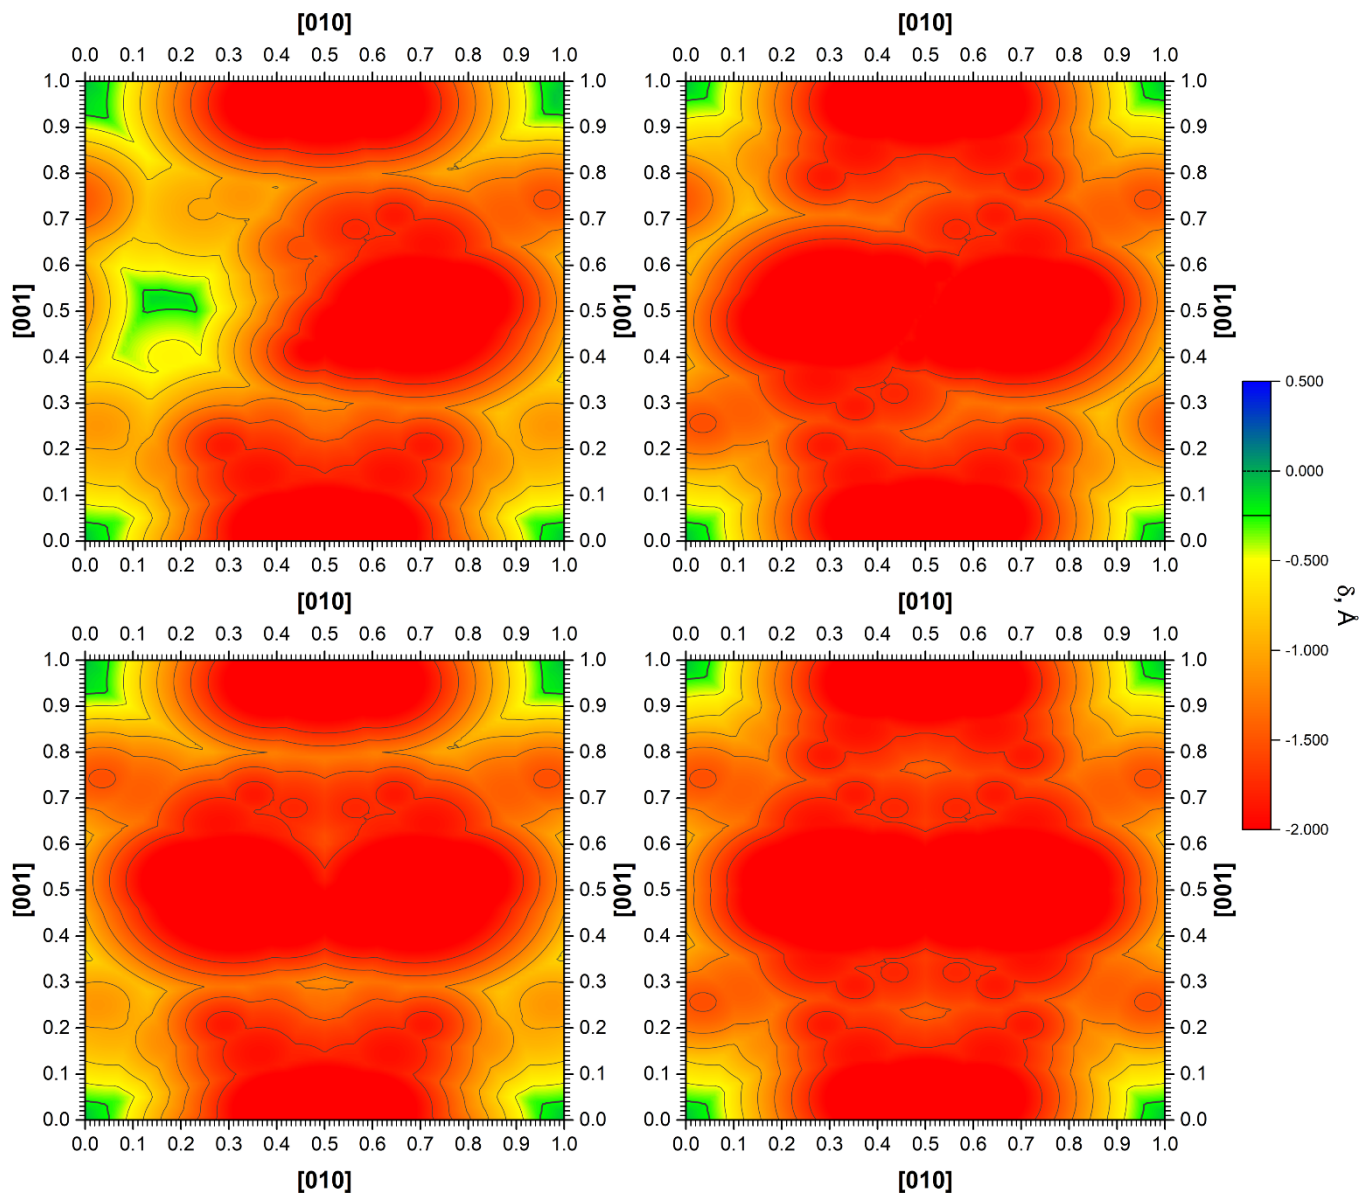

**Figure S20.** 2D-maps of the parameter  $\delta$  during the displacement of the mobile DBU to the fixed part within the (100) crystallographic layer calculated using four model systems extracted from the crystal structure of the ibuprofen polymorphic form **I** under the pressure of 4.00 GPa.

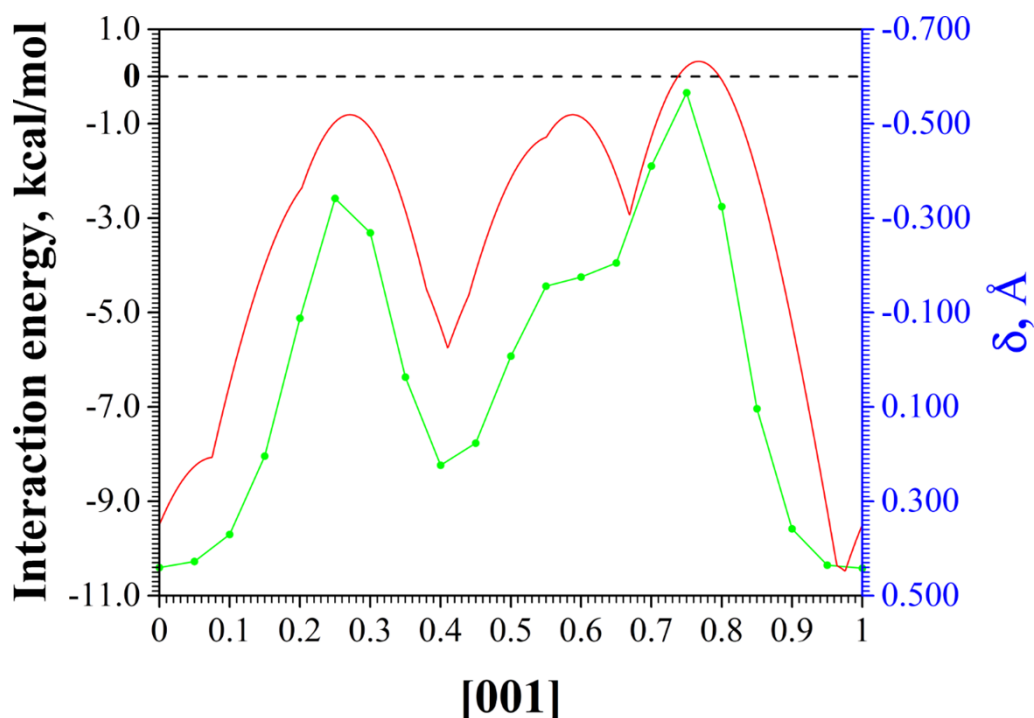

**Figure S21.** Profiles of interaction energy (bright green) and topological parameter  $\delta$  (red) occurring during the shear of the dimeric building unit(s) along the direction **[001]** in parallel to a neighboring layer (**100**) with lower coordinate  $a$  in the crystals of the polymorphic modification **I** of ibuprofen **under ambient pressure**. The line of zero energy is marked as the black dashed one.

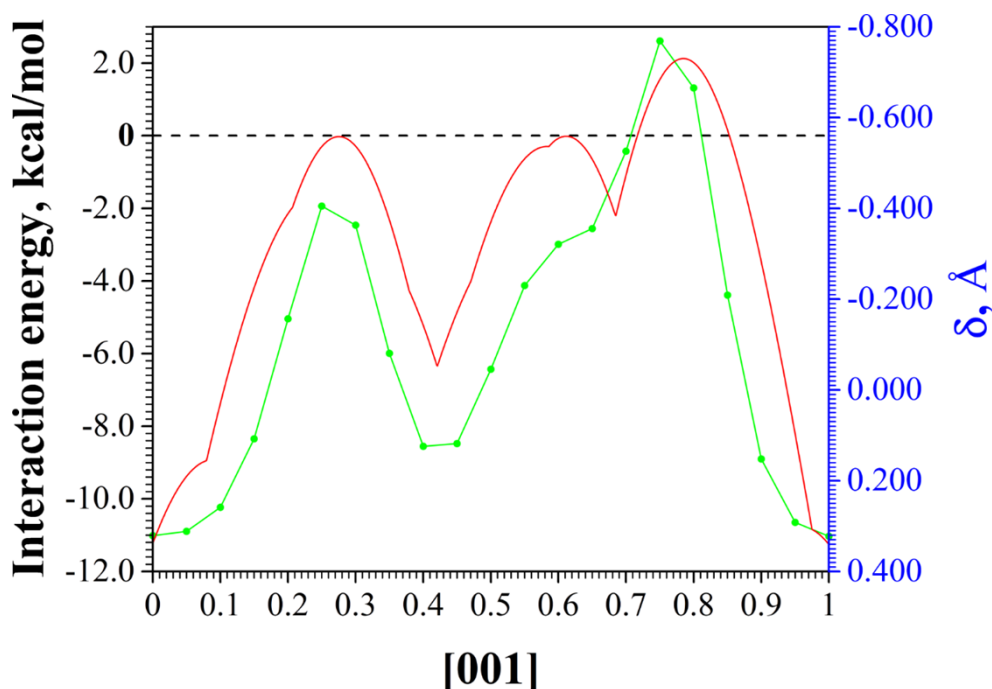

**Figure S22.** Profiles of interaction energy (bright green) and topological parameter  $\delta$  (red) occurring during the shear of the dimeric building unit(s) along the direction **[001]** in parallel to a neighboring layer (**100**) with lower coordinate  $a$  in the crystals of the polymorphic modification **I** of ibuprofen at the pressure of **0.23 GPa**. The line of zero energy is marked as the black dashed one.

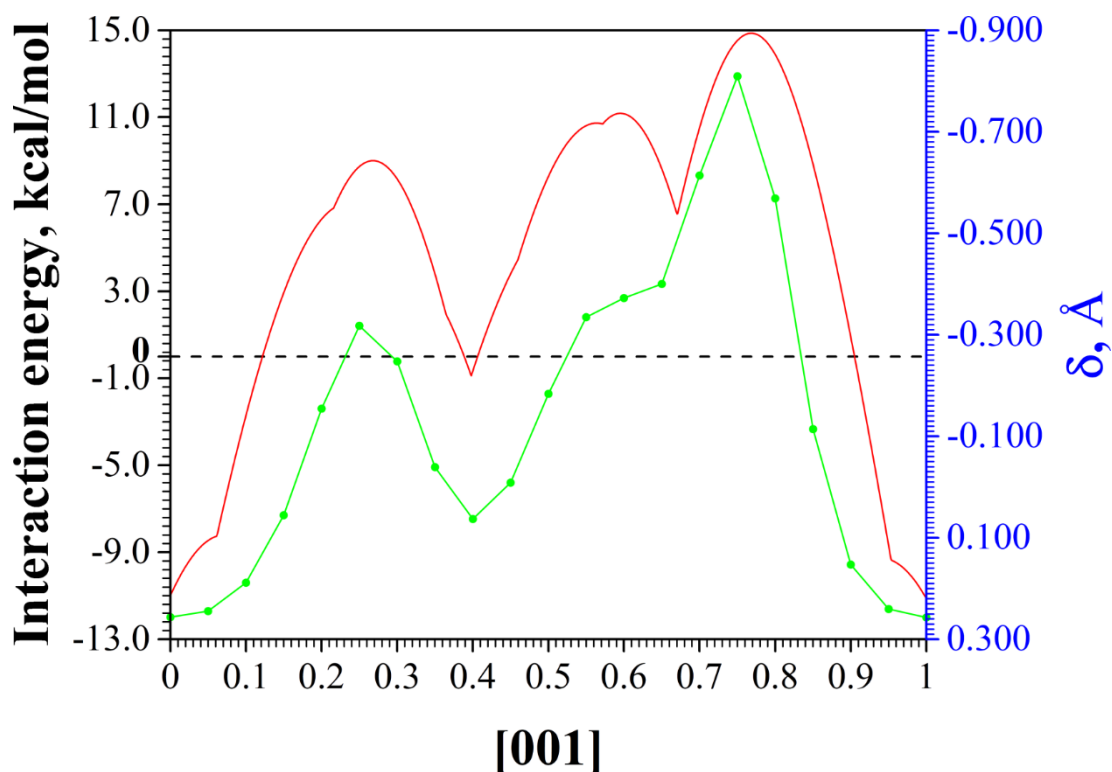

**Figure S23.** Profiles of interaction energy (bright green) and topological parameter  $\delta$  (red) occurring during the shear of the dimeric building unit(s) along the direction  $[001]$  in parallel to a neighboring layer (100) with lower coordinate  $a$  in the crystals of the polymorphic modification I of ibuprofen at the pressure of **0.60 GPa**. The line of zero energy is marked as the black dashed one.

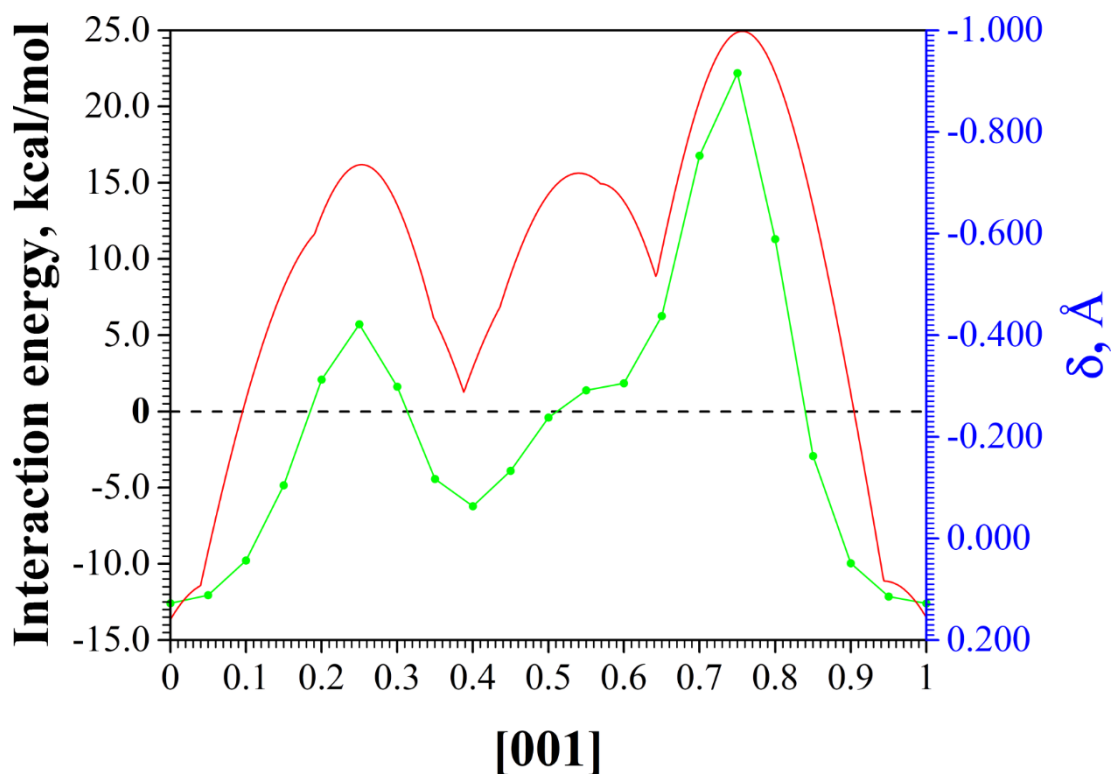

**Figure S24.** Profiles of interaction energy (bright green) and topological parameter  $\delta$  (red) occurring during the shear of the dimeric building unit(s) along the direction  $[001]$  in parallel

to a neighboring layer (**100**) with lower coordinate  $a$  in the crystals of the polymorphic modification **I** of ibuprofen at the pressure of **0.80 GPa**. The line of zero energy is marked as the black dashed one.

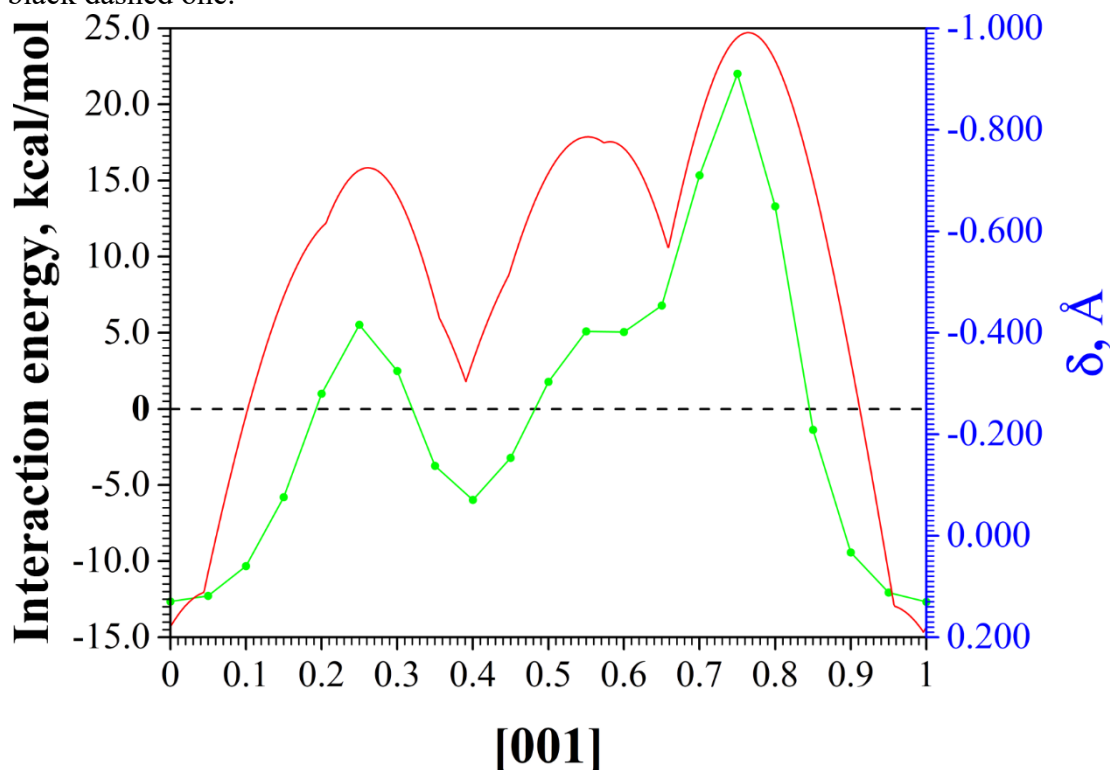

**Figure S25.** Profiles of interaction energy (bright green) and topological parameter  $\delta$  (red) occurring during the shear of the dimeric building unit(s) along the direction **[001]** in parallel to a neighboring layer (**100**) with lower coordinate  $a$  in the crystals of the polymorphic modification **I** of ibuprofen at the pressure of **0.88 GPa**. The line of zero energy is marked as the black dashed one.

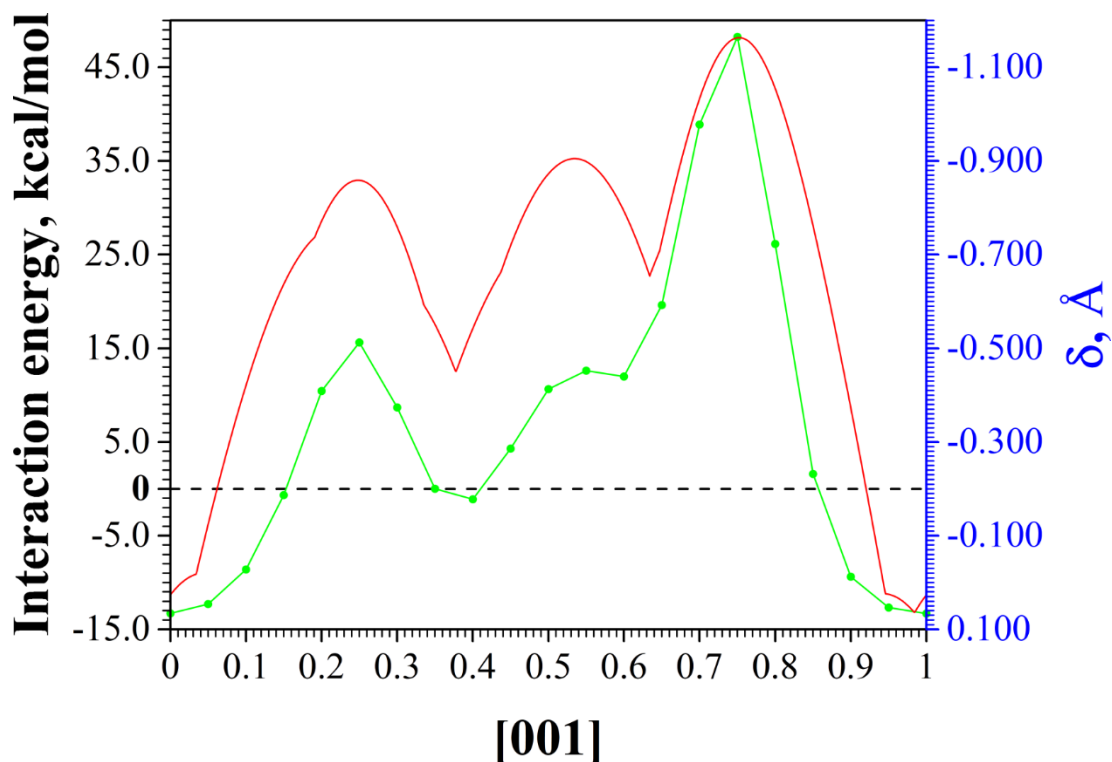

**Figure S26.** Profiles of interaction energy (bright green) and topological parameter  $\delta$  (red) occurring during the shear of the dimeric building unit(s) along the direction **[001]** in parallel to a neighboring layer (**100**) with lower coordinate  $a$  in the crystals of the polymorphic modification I of ibuprofen at the pressure of **1.70 GPa**. The line of zero energy is marked as the black dashed one.

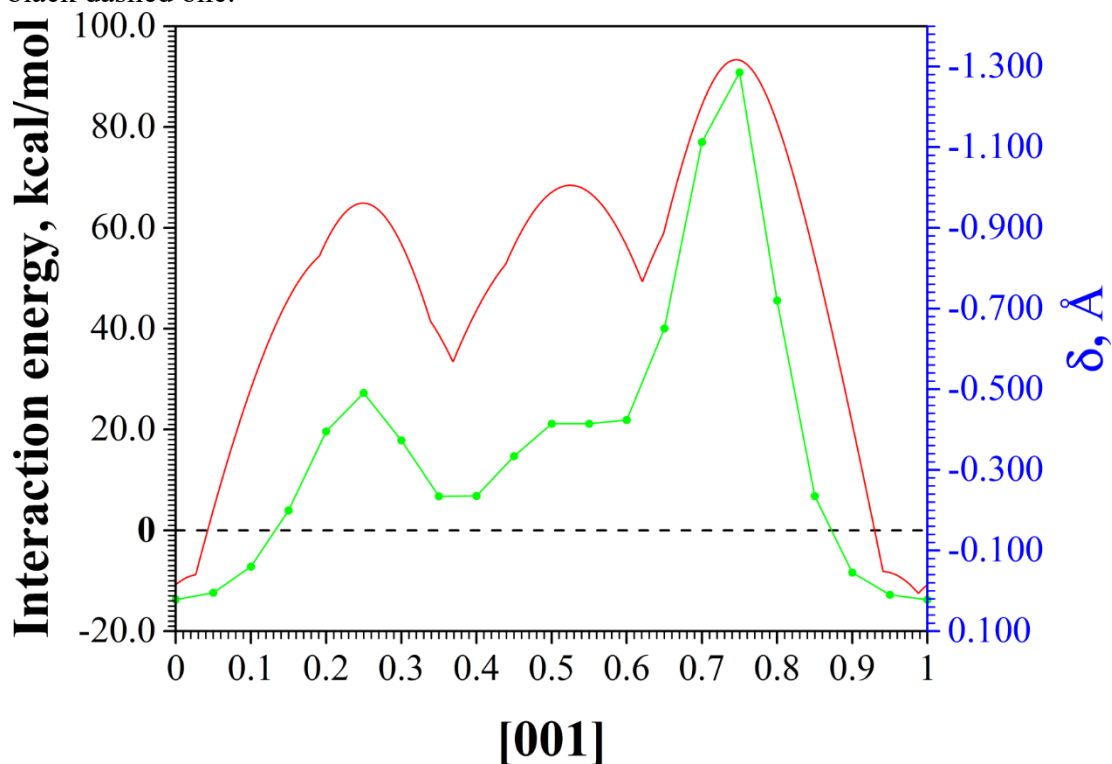

**Figure S27.** Profiles of interaction energy (bright green) and topological parameter  $\delta$  (red) occurring during the shear of the dimeric building unit(s) along the direction **[001]** in parallel to a neighboring layer (**100**) with lower coordinate  $a$  in the crystals of the polymorphic

modification **I** of ibuprofen at the pressure of **2.65 GPa**. The line of zero energy is marked as the black dashed one.

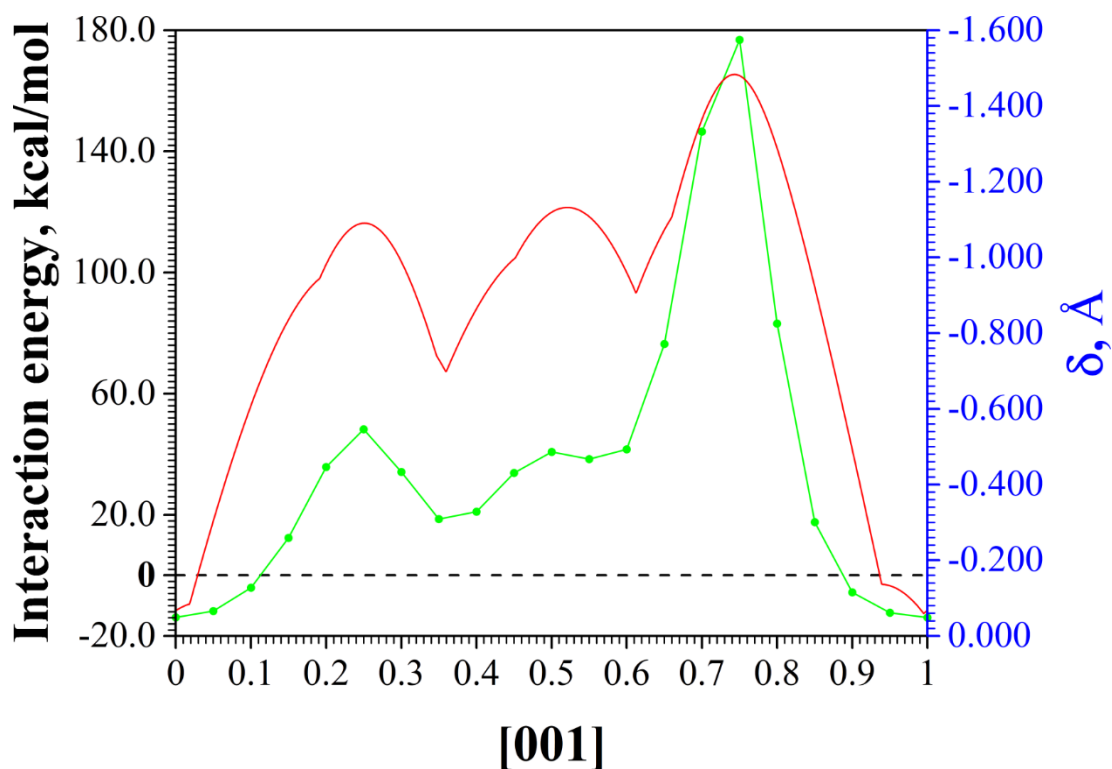

**Figure S28.** Profiles of interaction energy (bright green) and topological parameter  $\delta$  (red) occurring during the shear of the dimeric building unit(s) along the direction **[001]** in parallel to a neighboring layer (**100**) with lower coordinate  $a$  in the crystals of the polymorphic modification **I** of ibuprofen at the pressure of **4.00 GPa**. The line of zero energy is marked as the black dashed one.
